# Supplementary material for: Klf5 Deletion Promotes Pten Deletion–Initiated Luminal-Type Mouse Prostate Tumors through Multiple Oncogenic Signaling Pathways
Source: PubMed Central journal article supplement — Neoplasia. 2014 Nov 20;16(11):883–99. doi: 10.1016/j.neo.2014.09.006 (PMC4240924; doi:10.1016/j.neo.2014.09.006), 2014-11-20

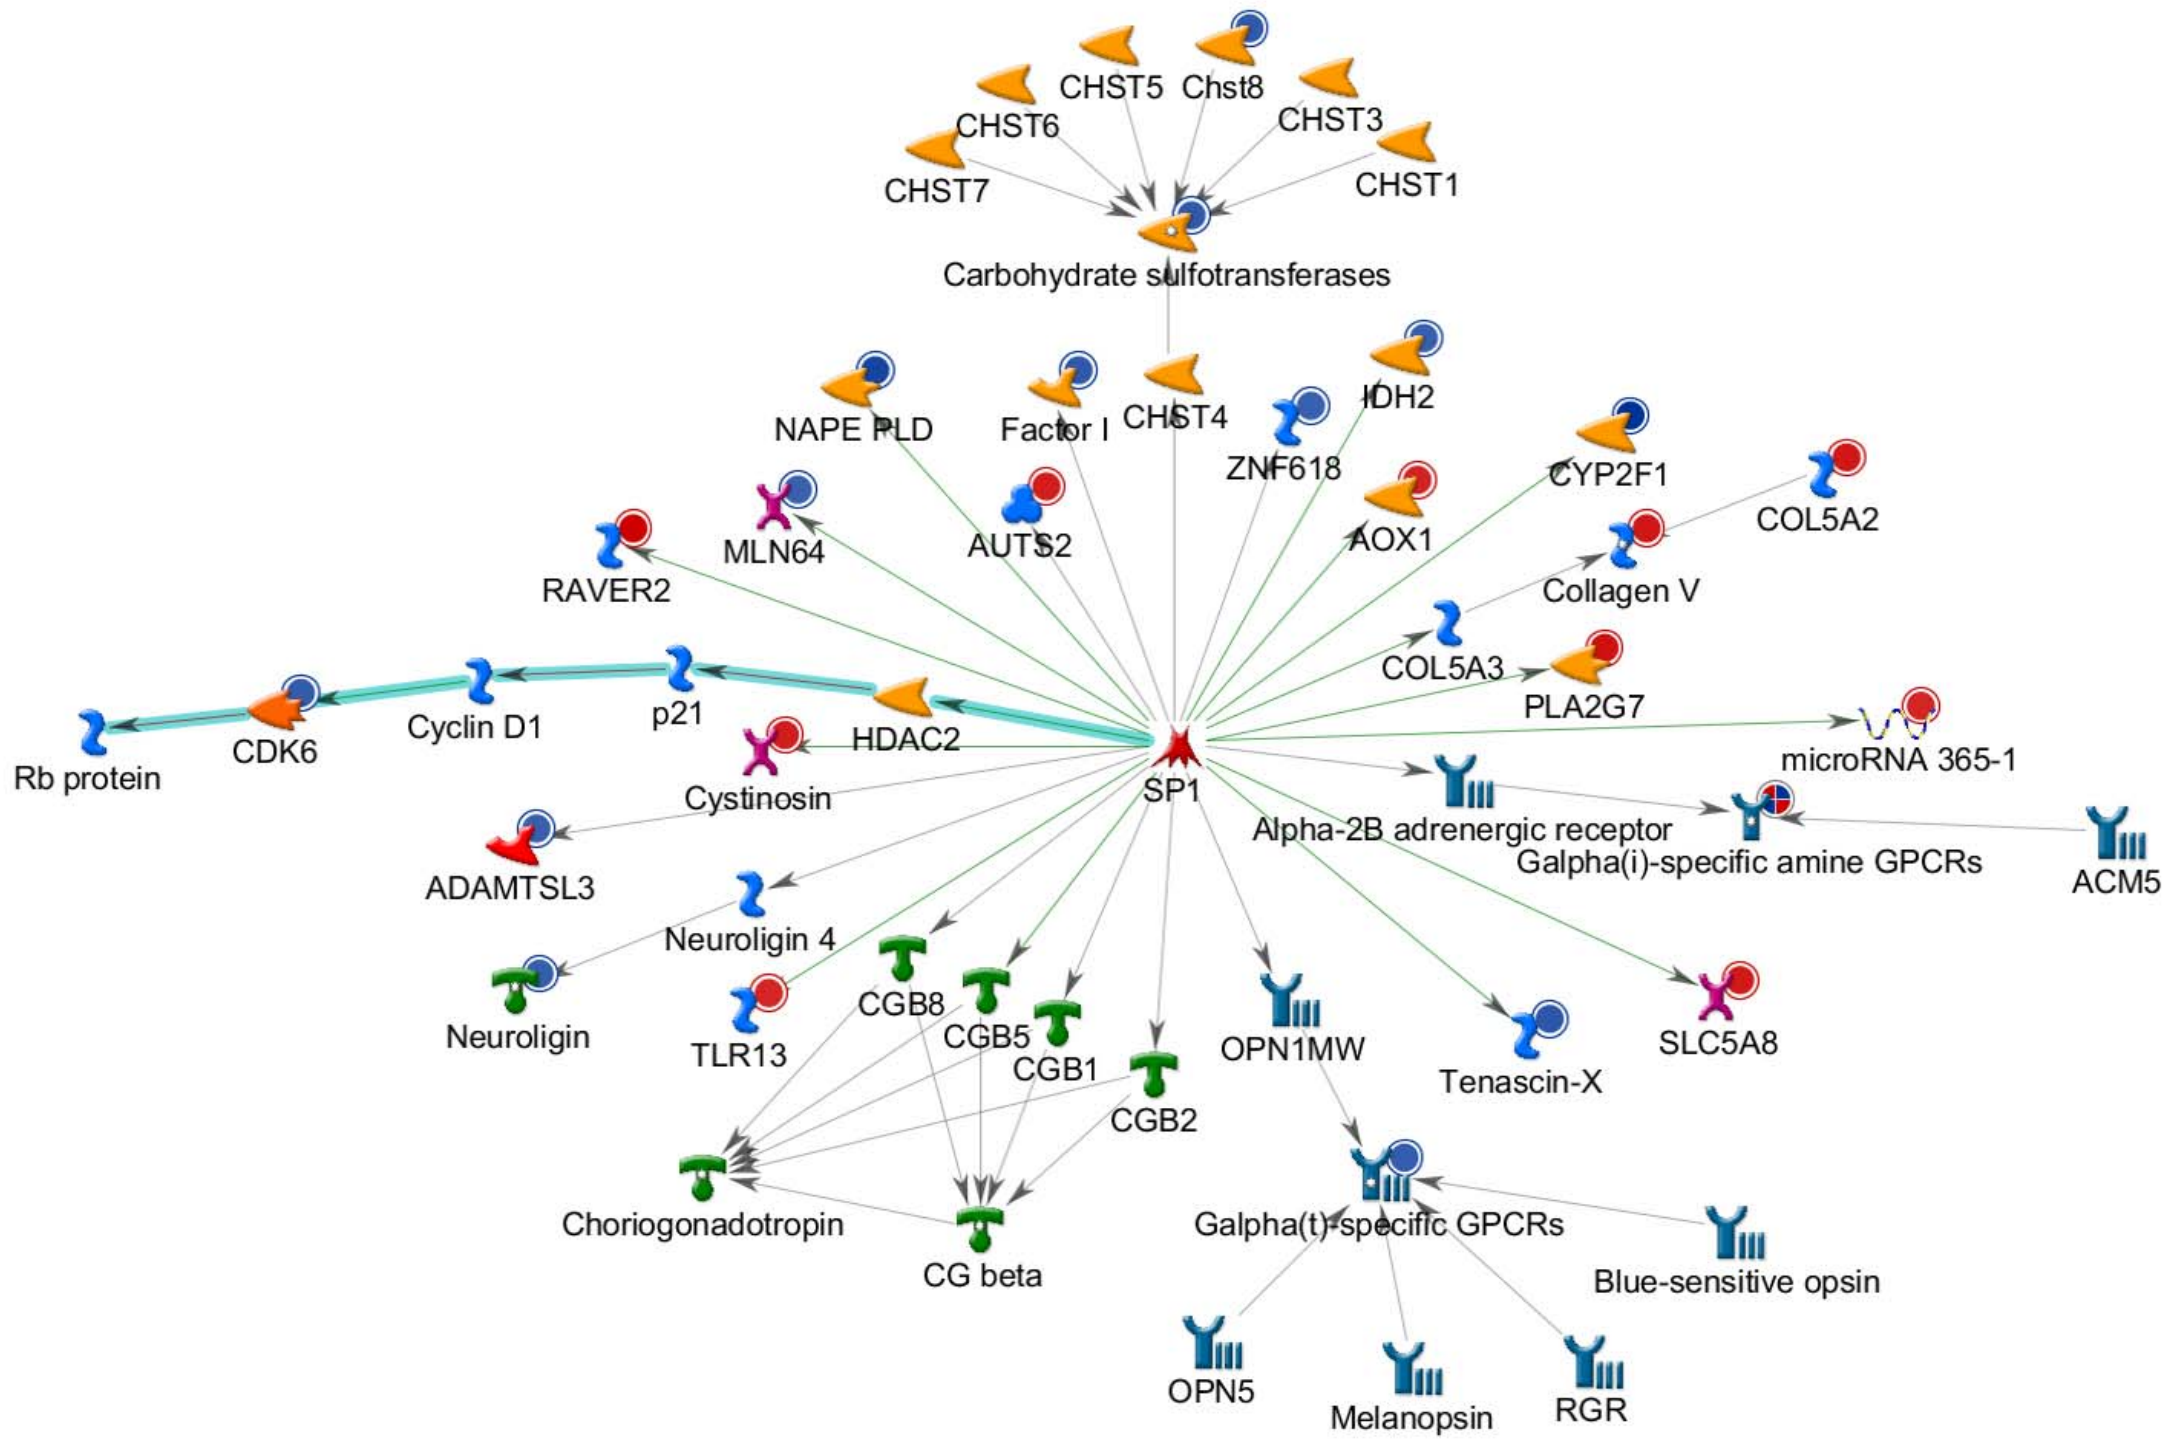

Carbohydrate sulfotransferases

SP1

CG beta

OPN5

Melanopsin

RGR

Blue-sensitive opsin

Galpha(t)-specific GPCRs

Galpha(i)-specific amine GPCRs

Tenascin-X

SLC5A8

OPN1MW

Neuroigin

Neuroigin 4

ADAMTSL3

Cystinosin

Alpha-2B adrenergic receptor

Galpha(i)-specific amine GPCRs

microRNA 365-1

COL5A3

Collagen V

COL5A2

CYP2F1

IDH2

ZNF618

AOX1

AUTS2

Factor I

NAPE PLD

CHST4

CHST7

CHST6

CHST5

Chst8

CHST3

CHST1

Rb protein

CDK6

Cyclin D1

p21

HDAC2

RAVER2

MLN64

AUTS2

ZNF618

AOX1

COL5A3

Collagen V

COL5A2

CYP2F1

IDH2

ZNF618

AOX1

AUTS2

Factor I

NAPE PLD

CHST4

CHST7

CHST6

CHST5

Chst8

CHST3

CHST1

Rb protein

CDK6

Cyclin D1

p21

HDAC2

RAVER2

MLN64

AUTS2

ZNF618

AOX1

COL5A3

Collagen V

COL5A2

CYP2F1

IDH2

ZNF618

AOX1

AUTS2

Factor I

NAPE PLD

CHST4

CHST7

CHST6

CHST5

Chst8

CHST3

CHST1

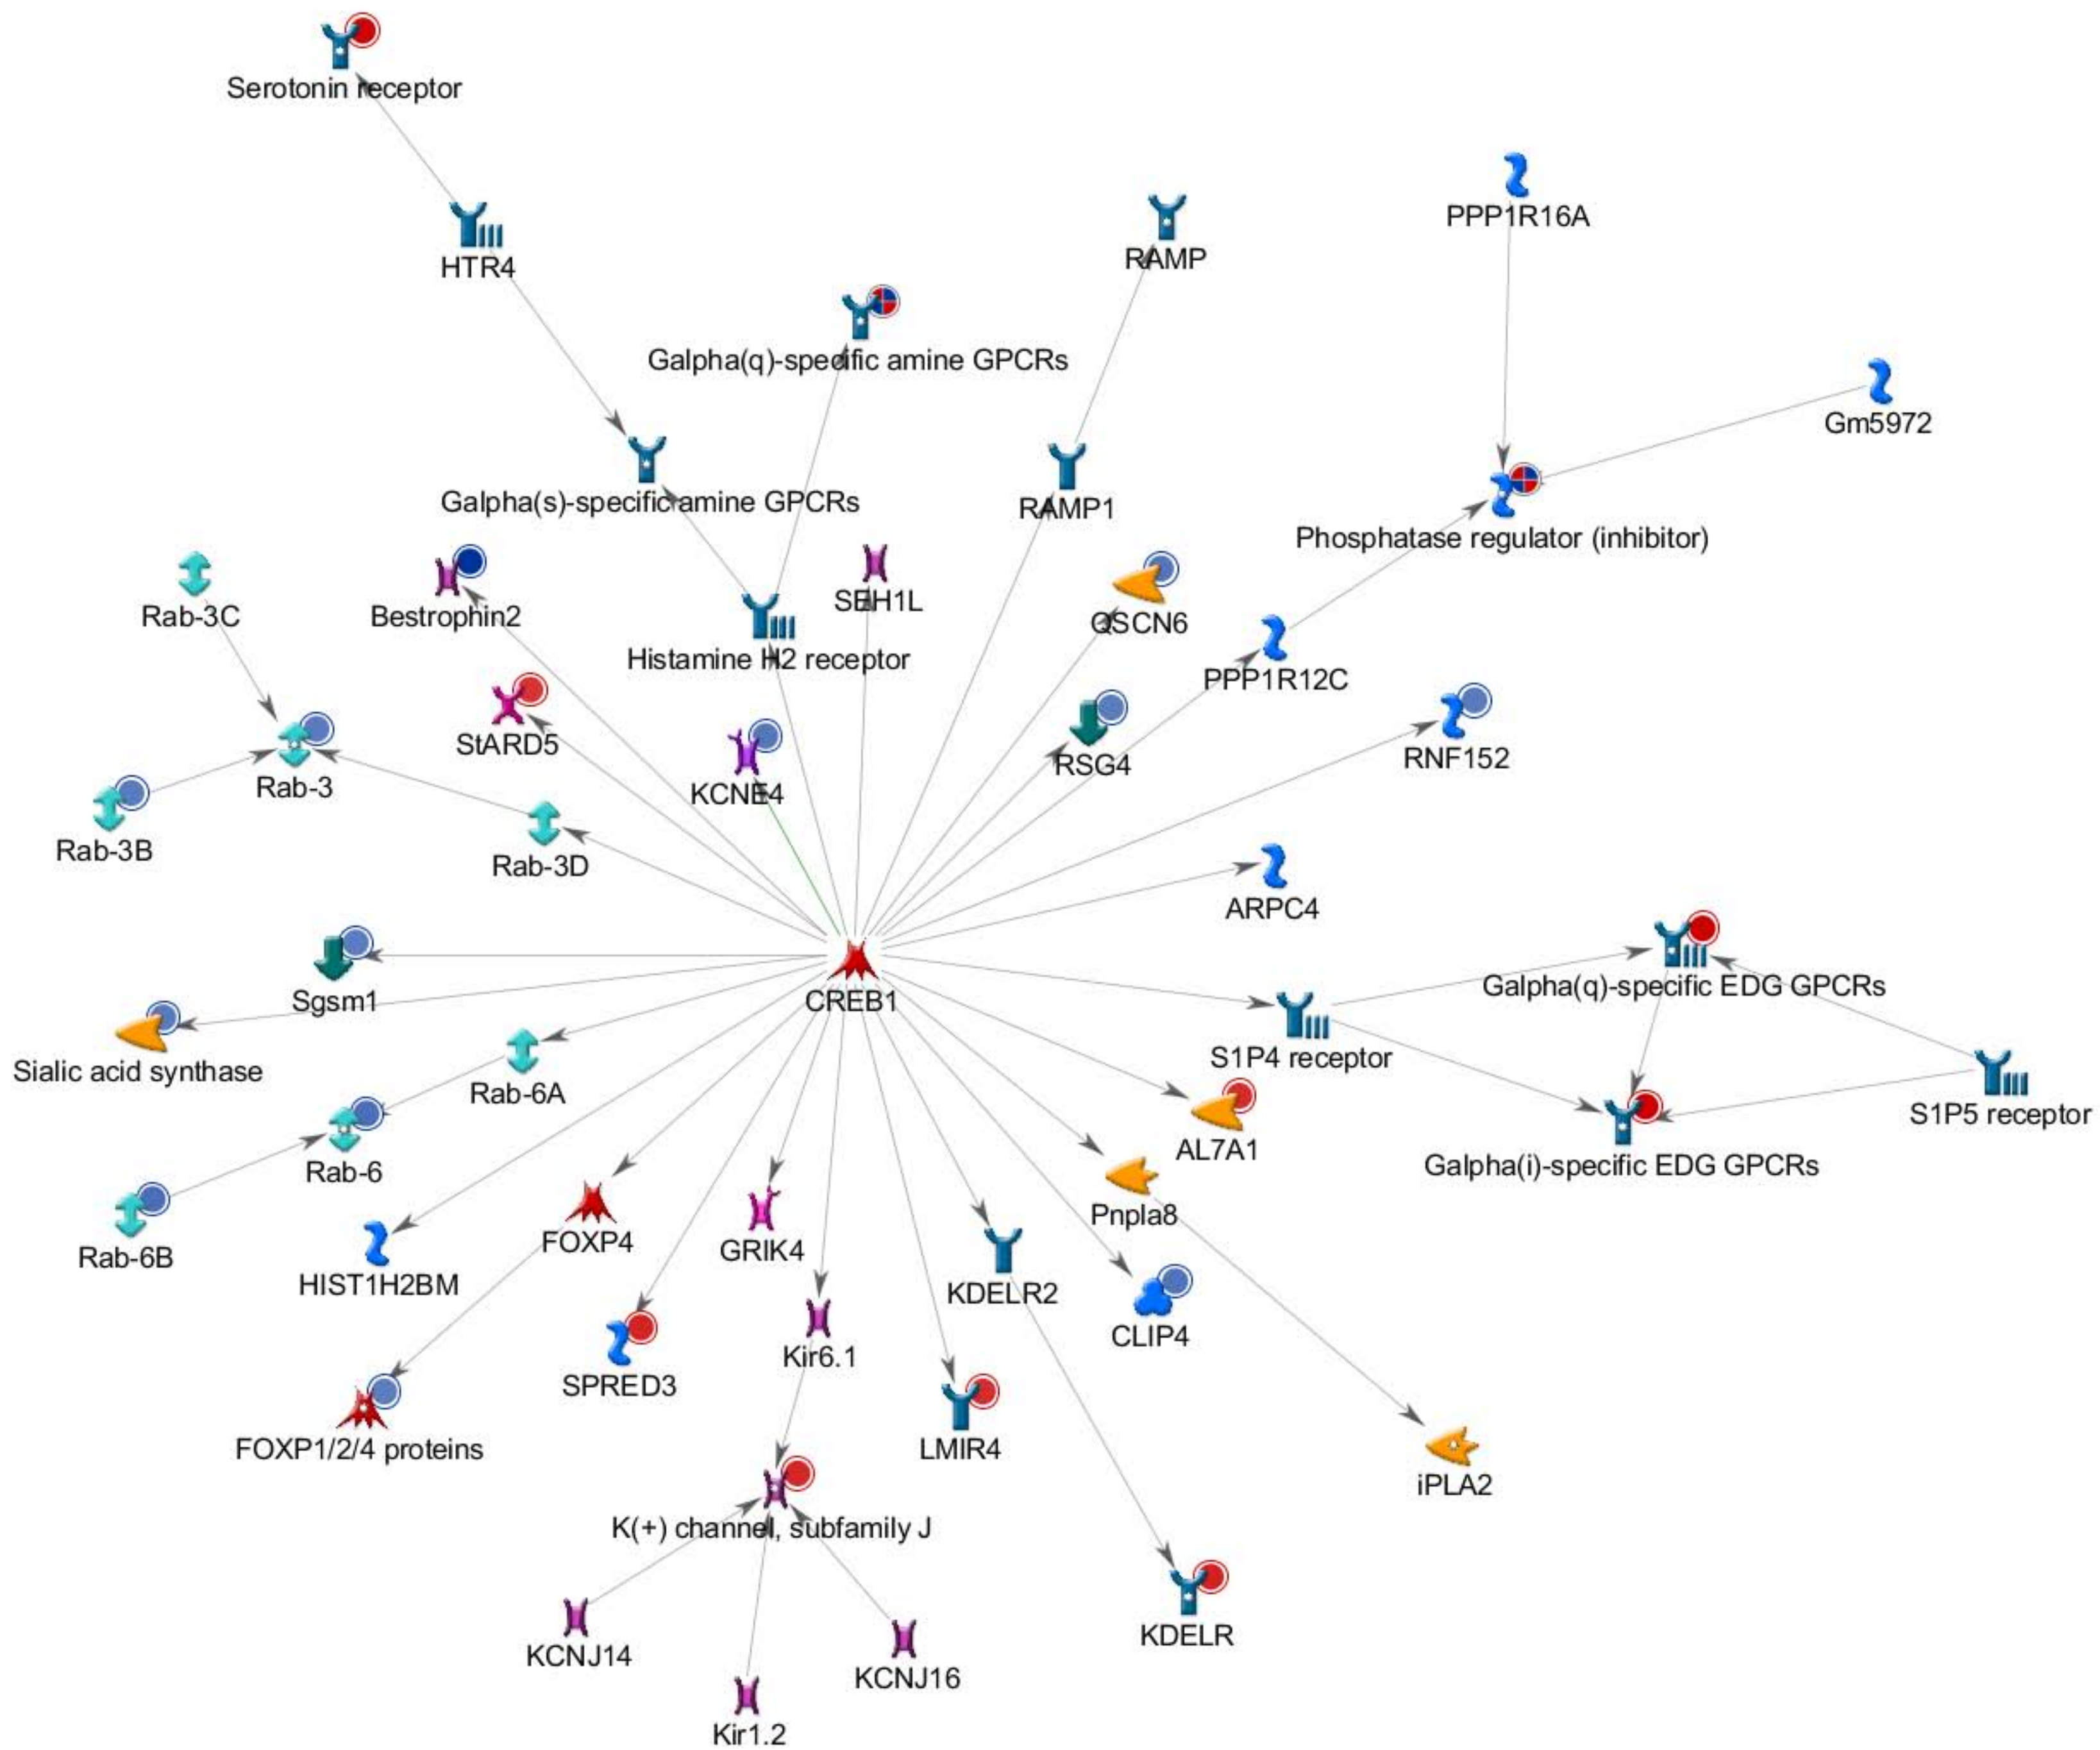







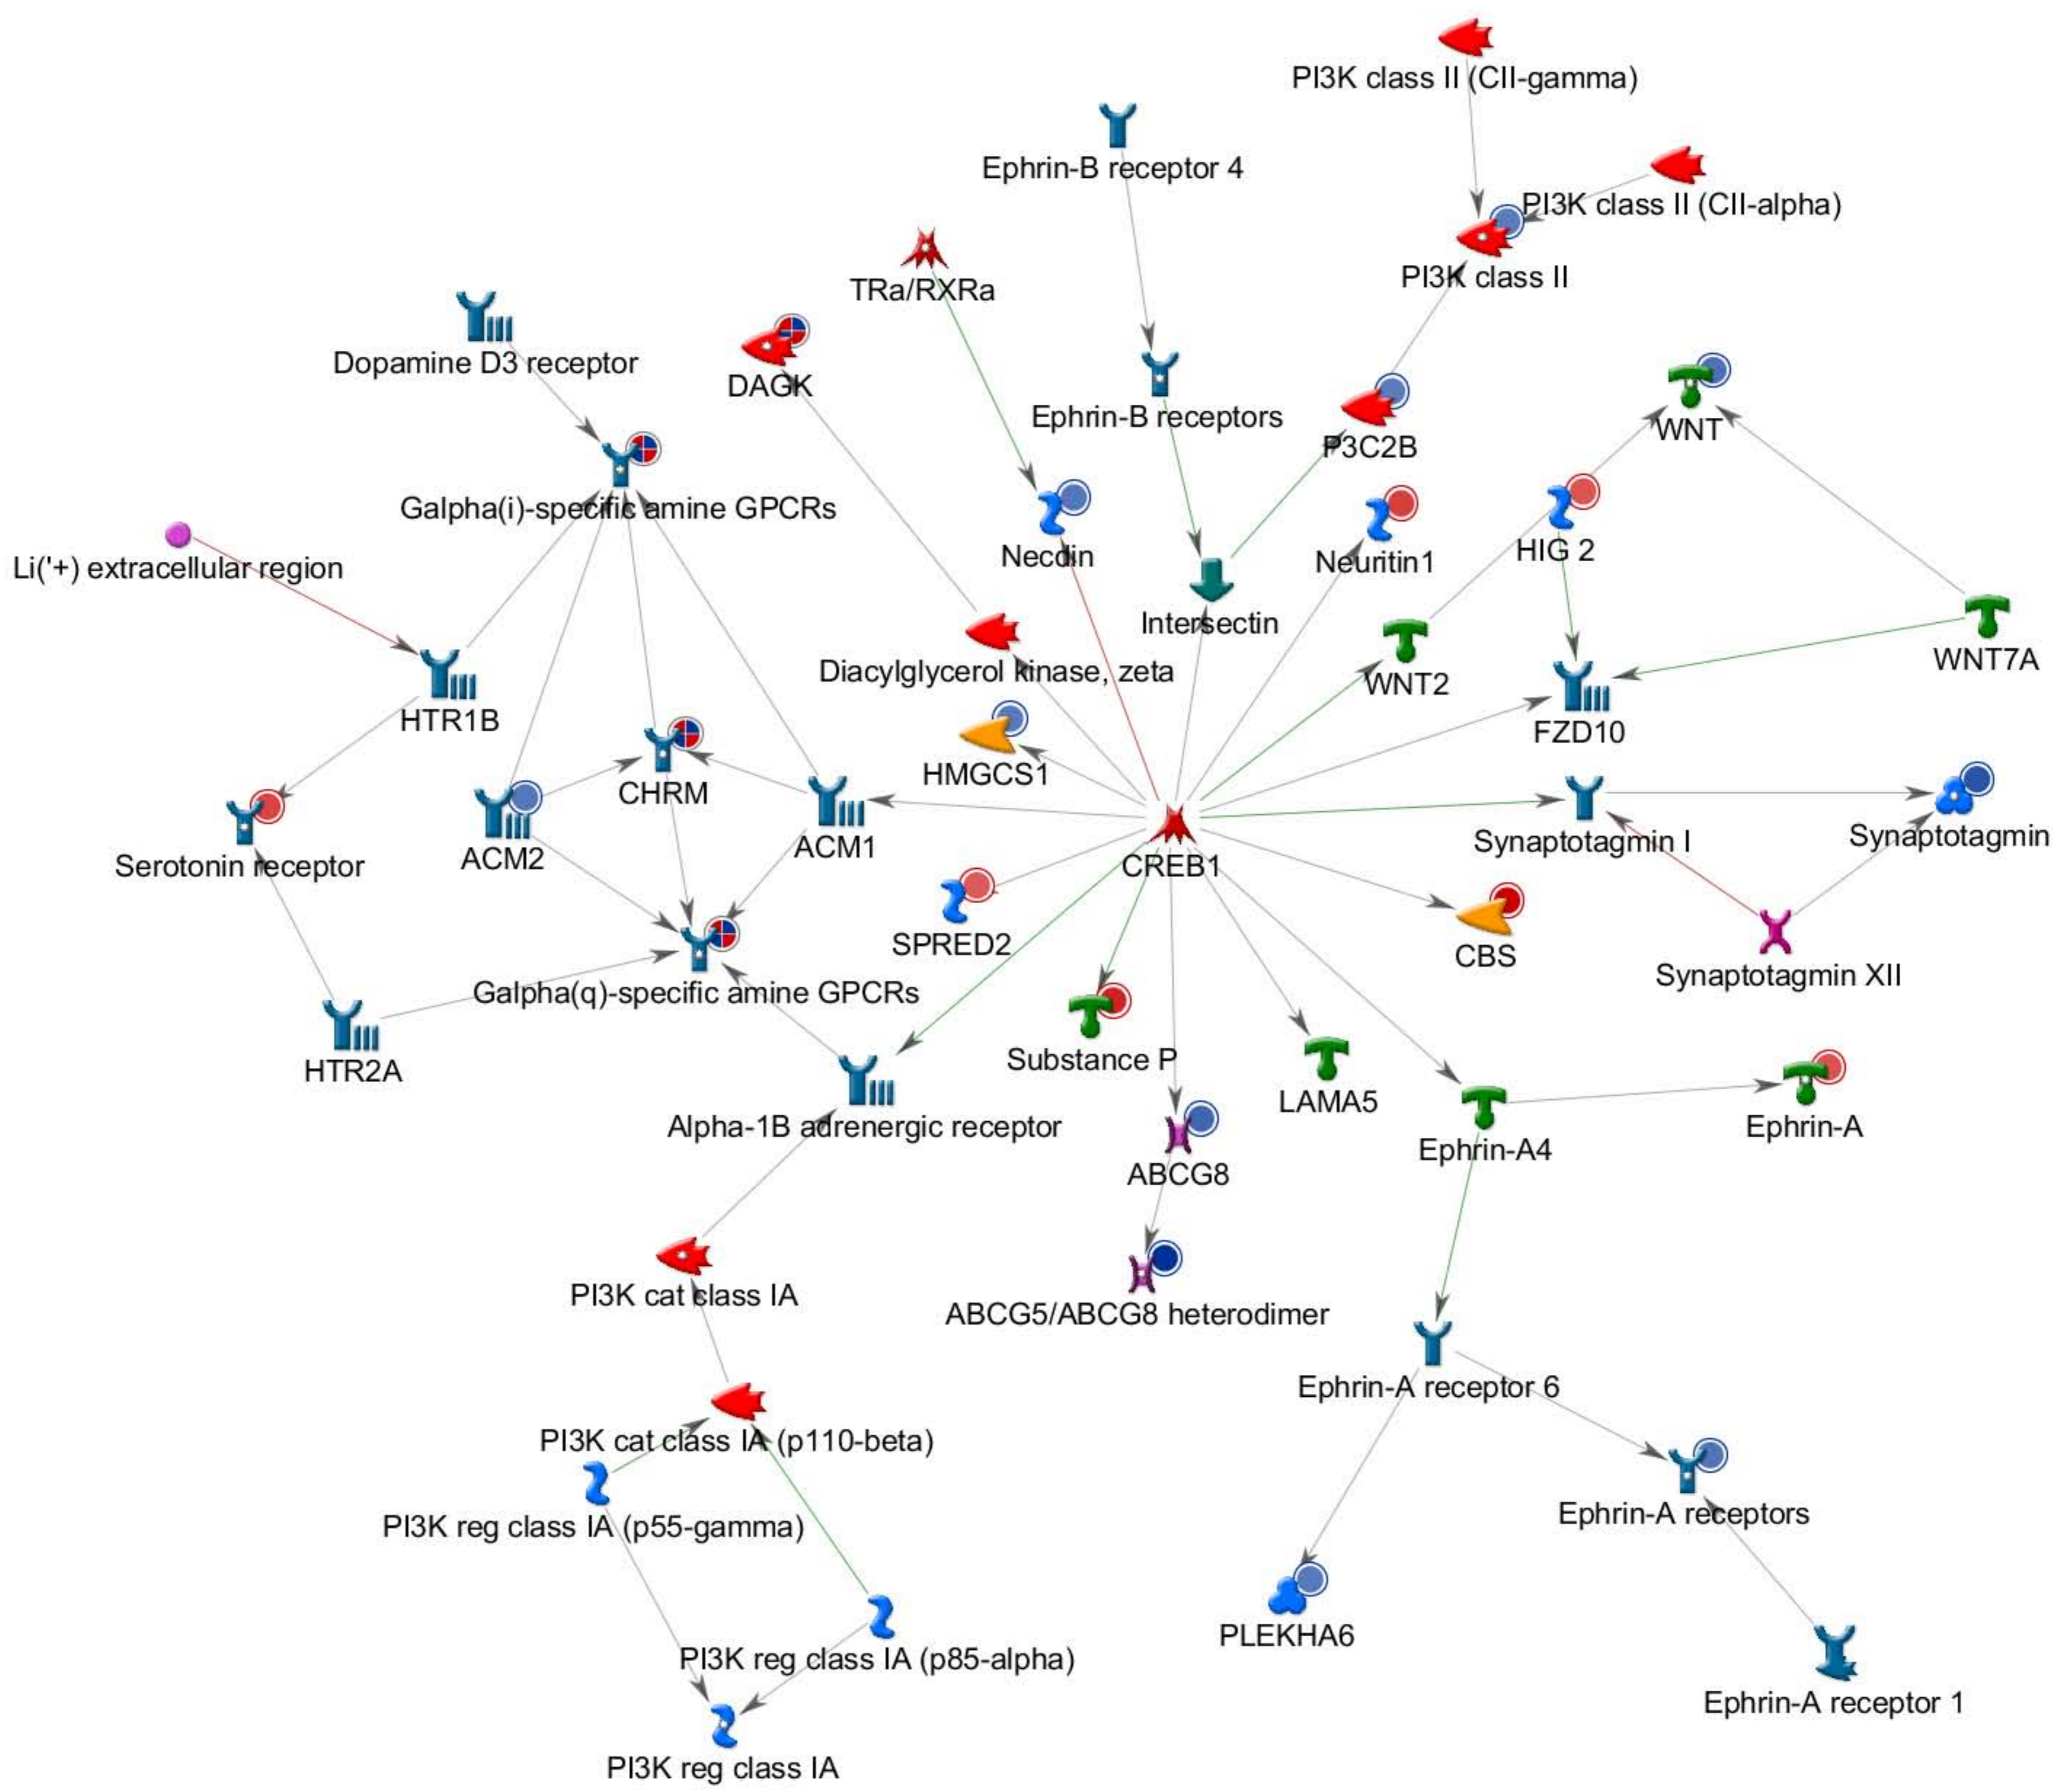



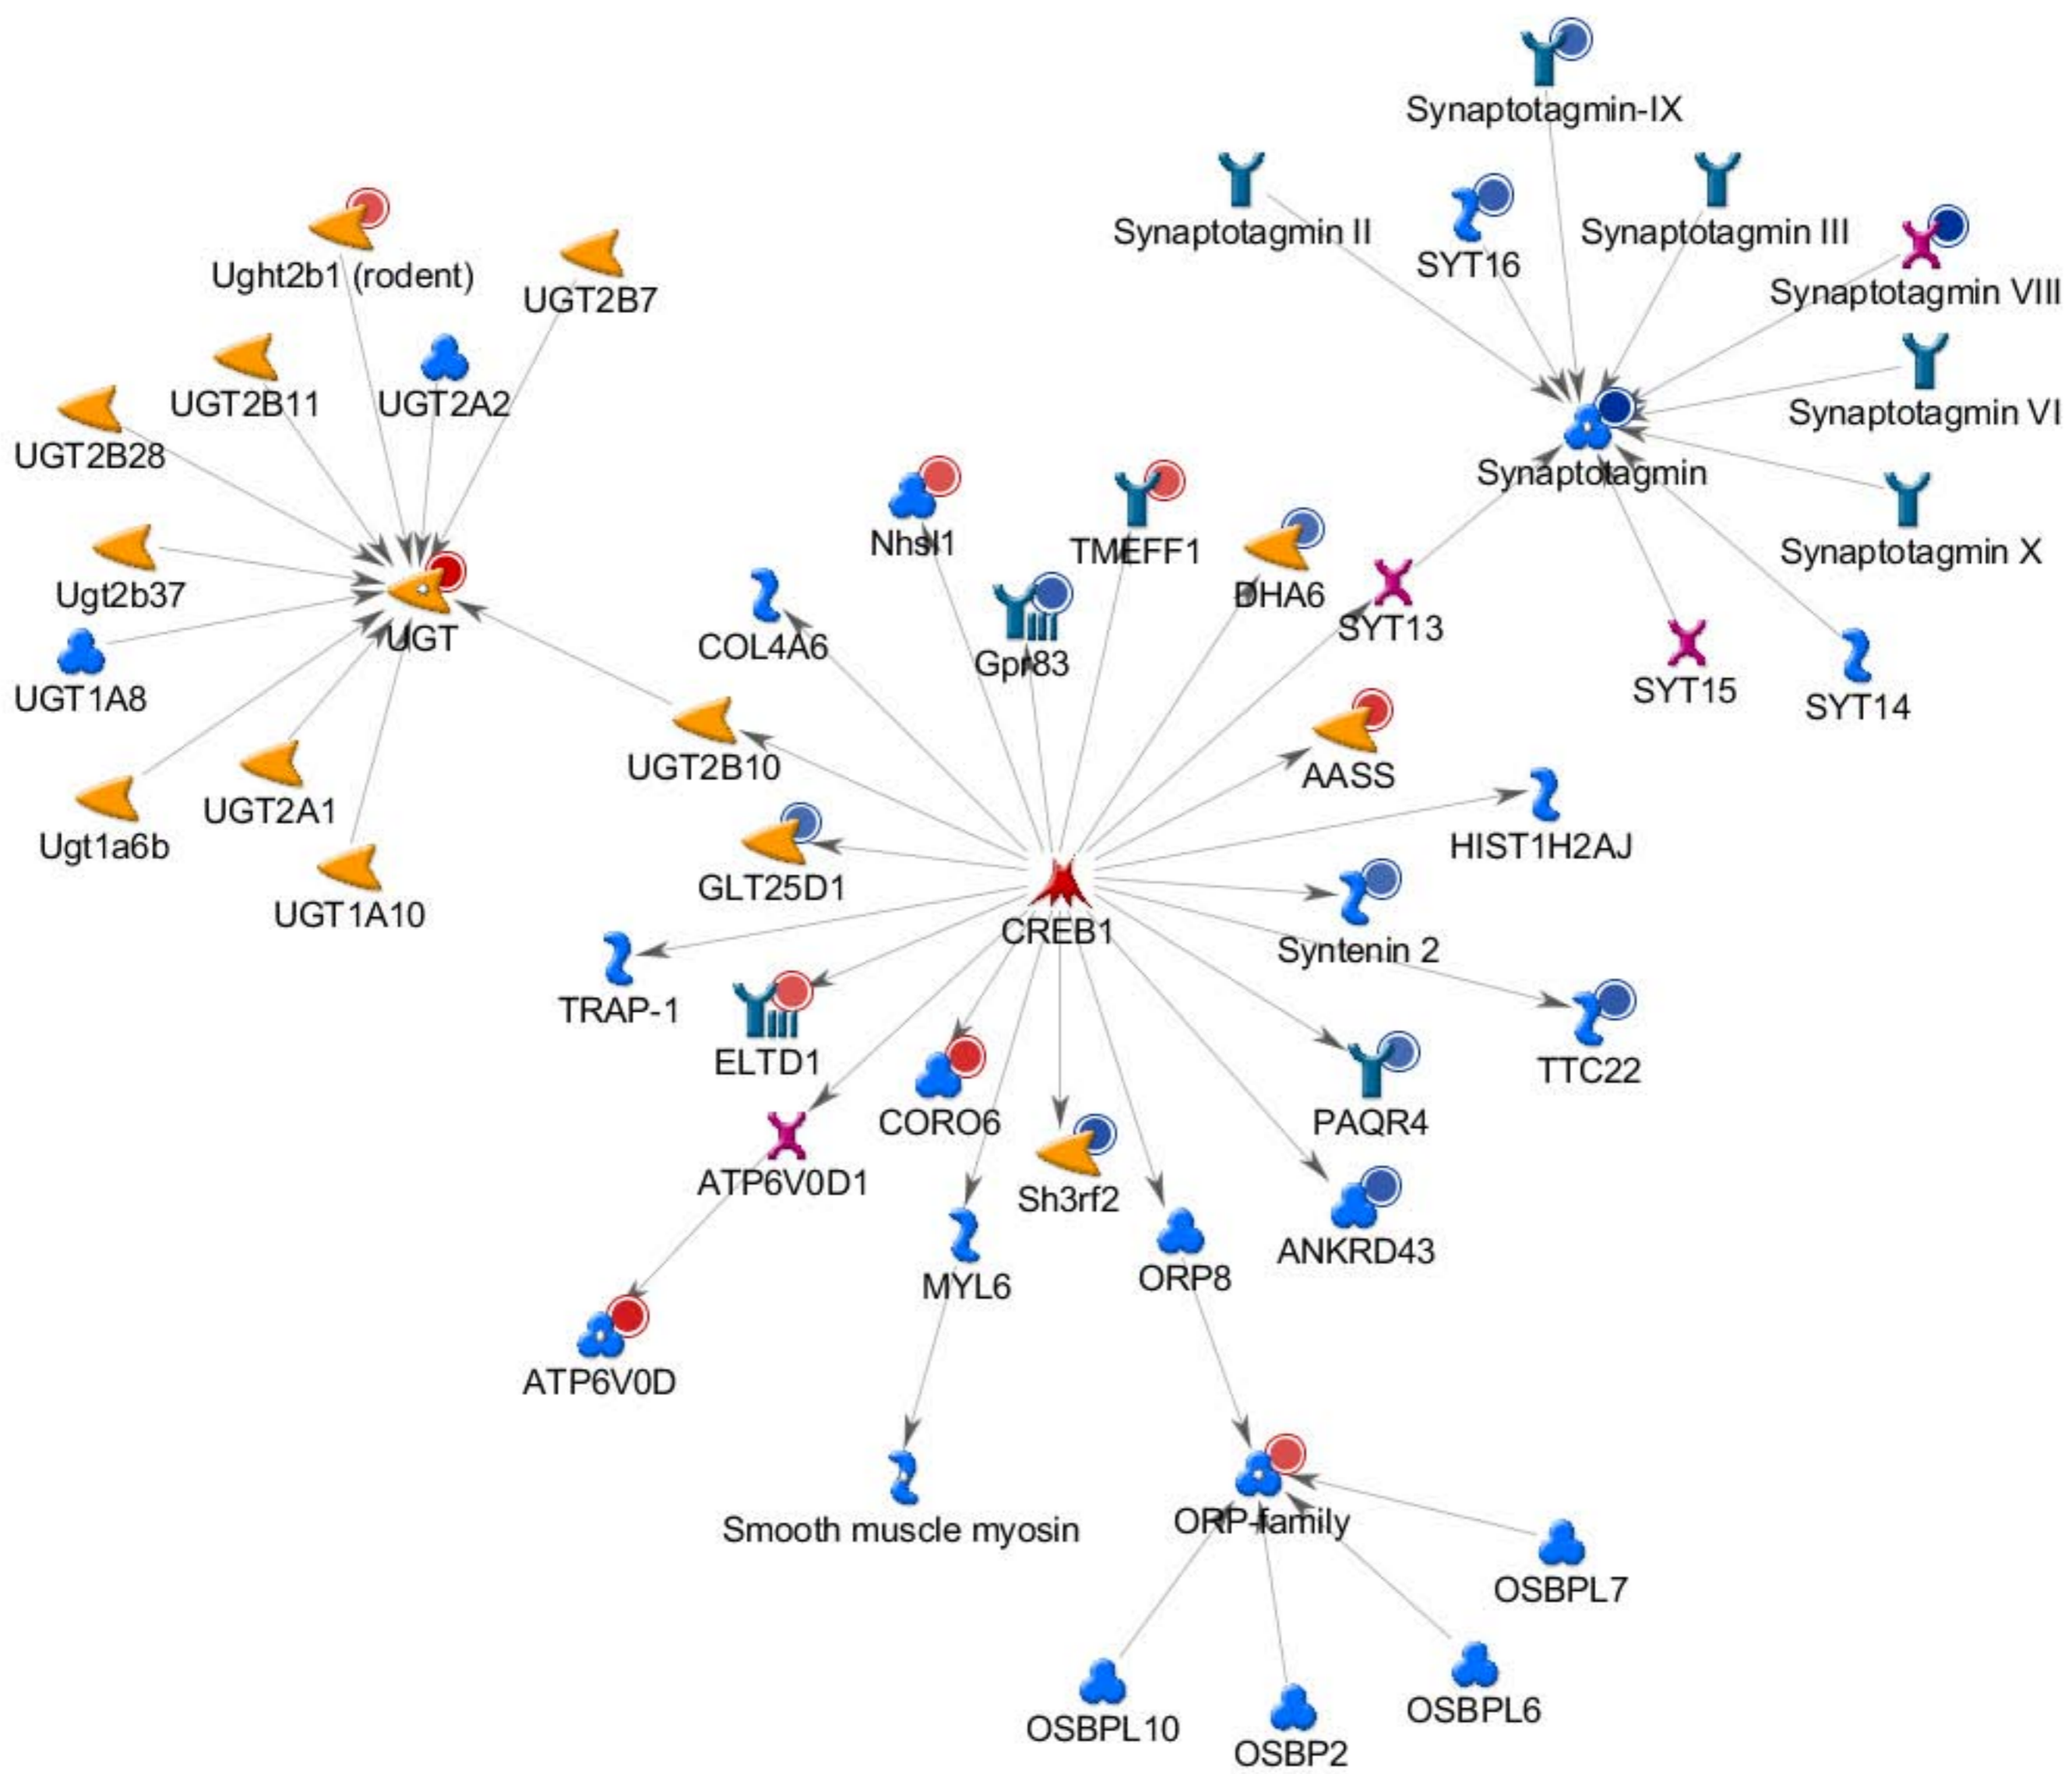



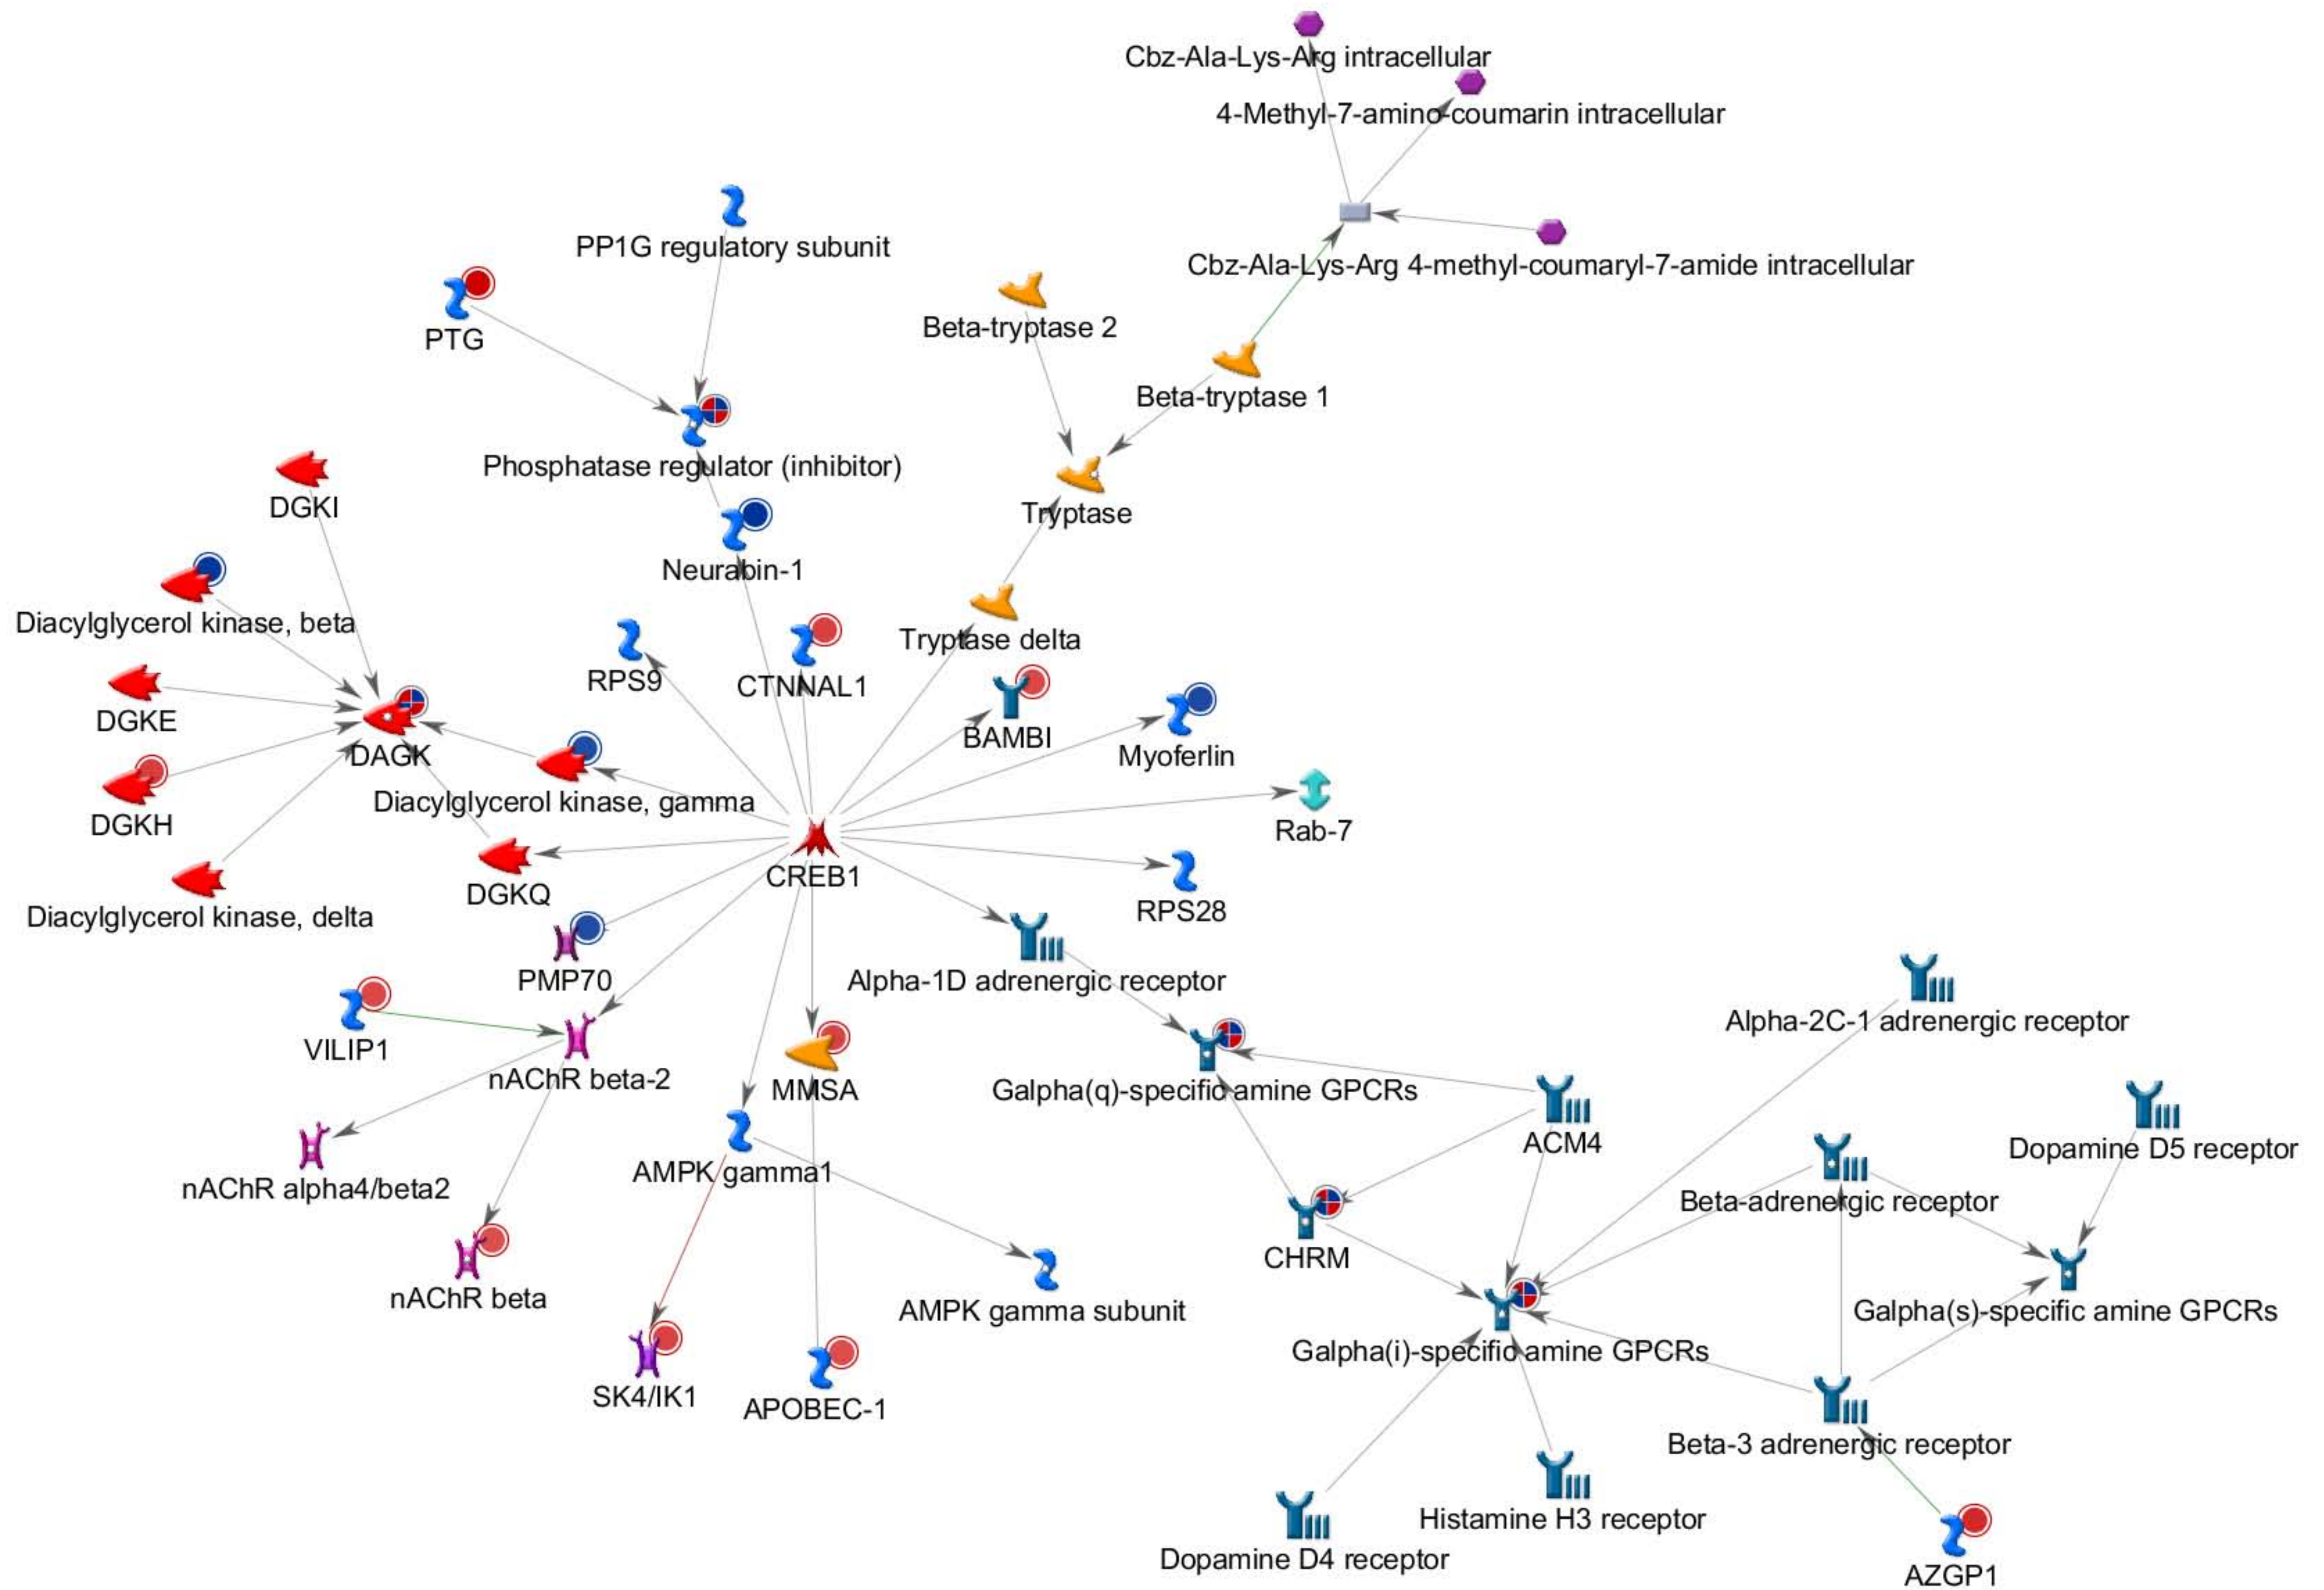



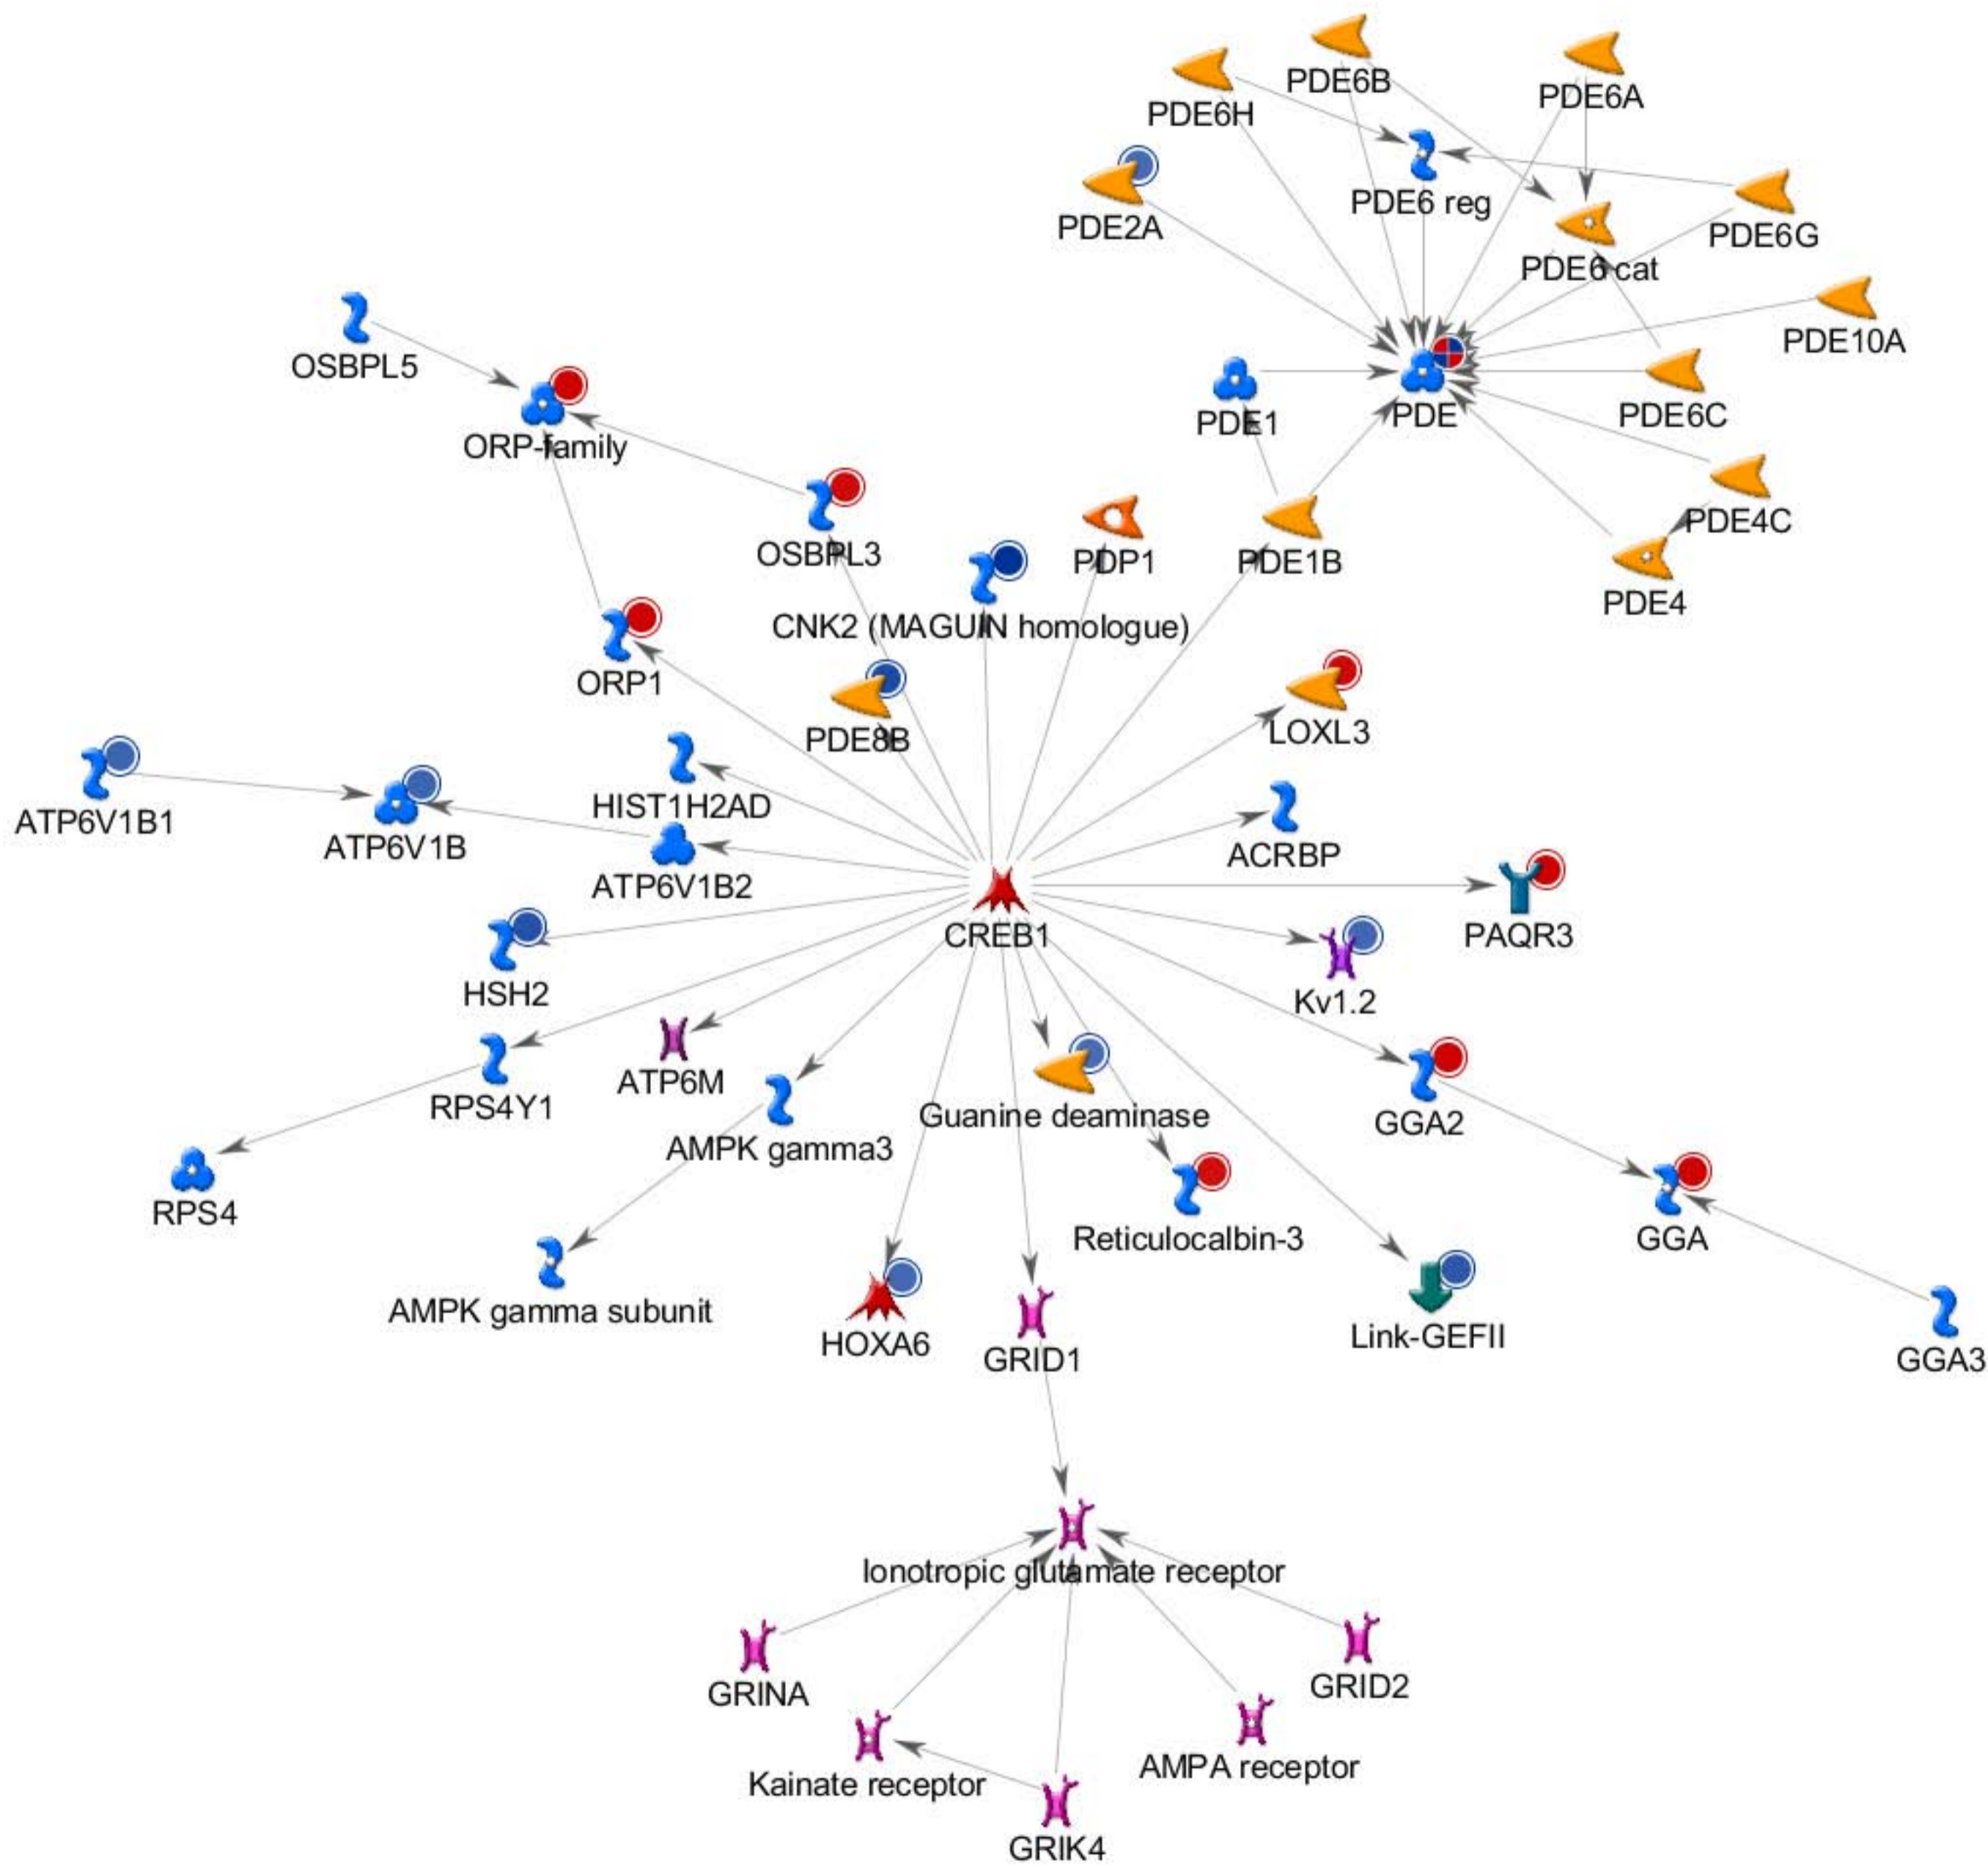



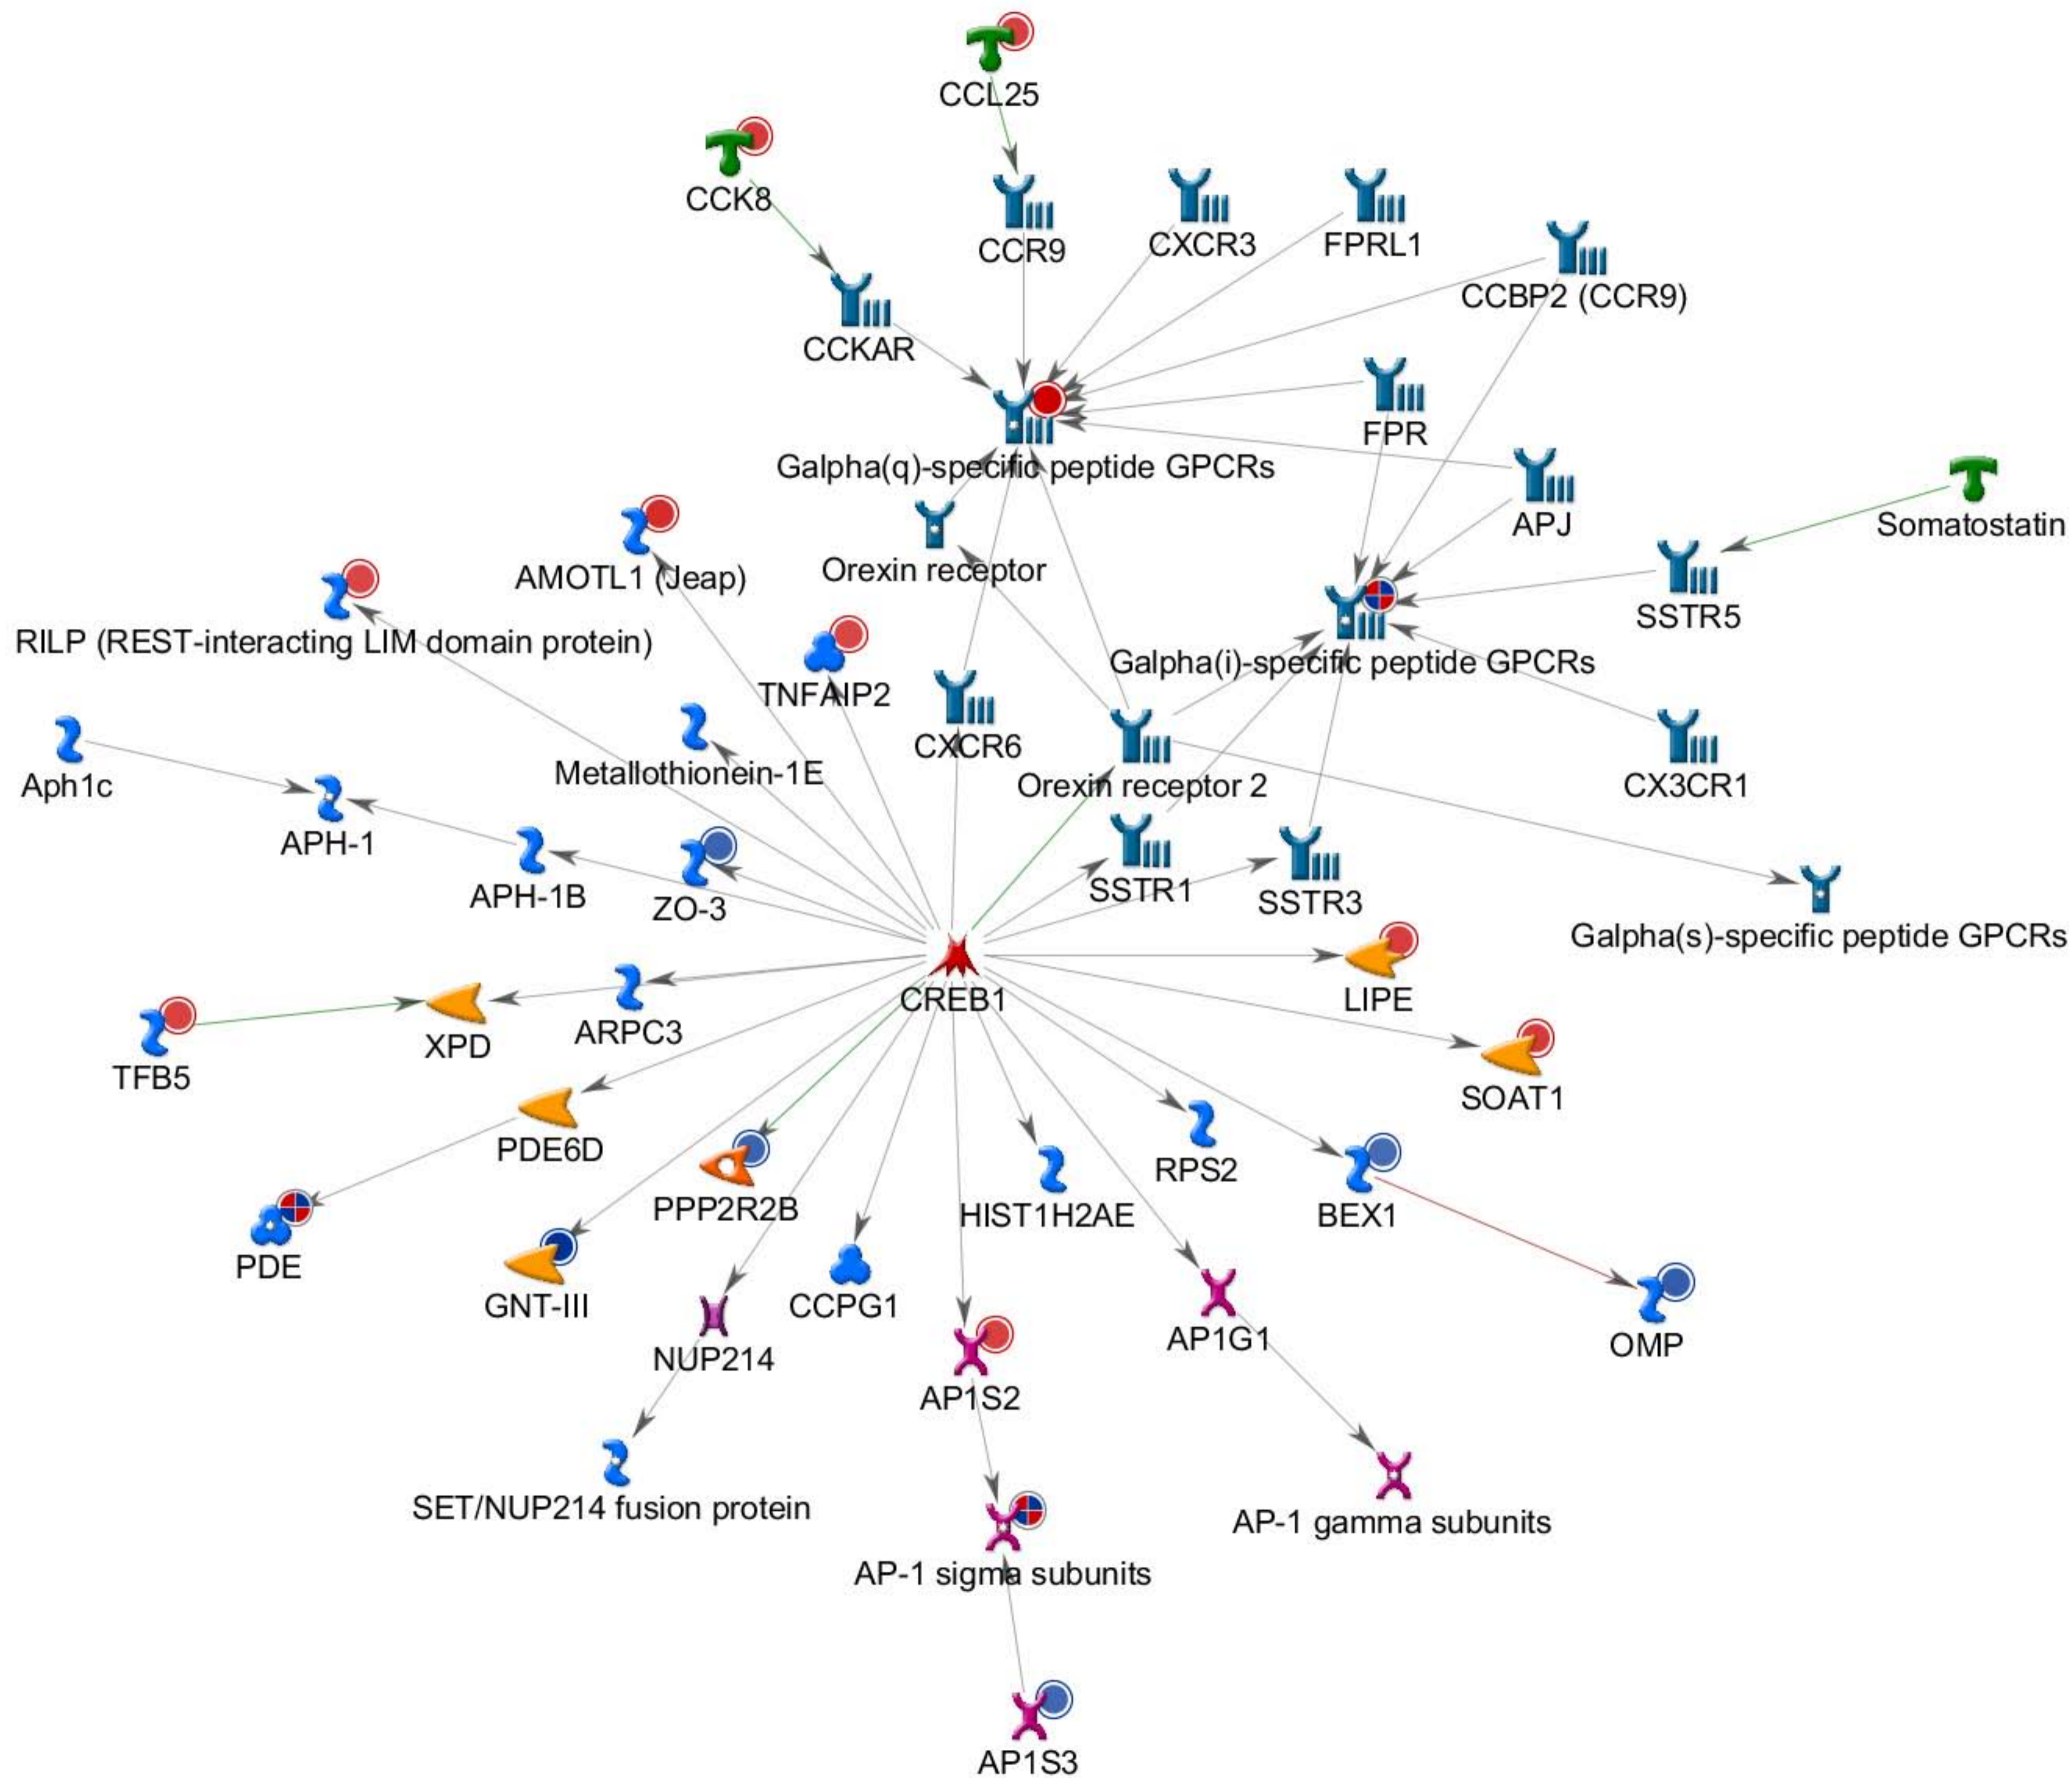







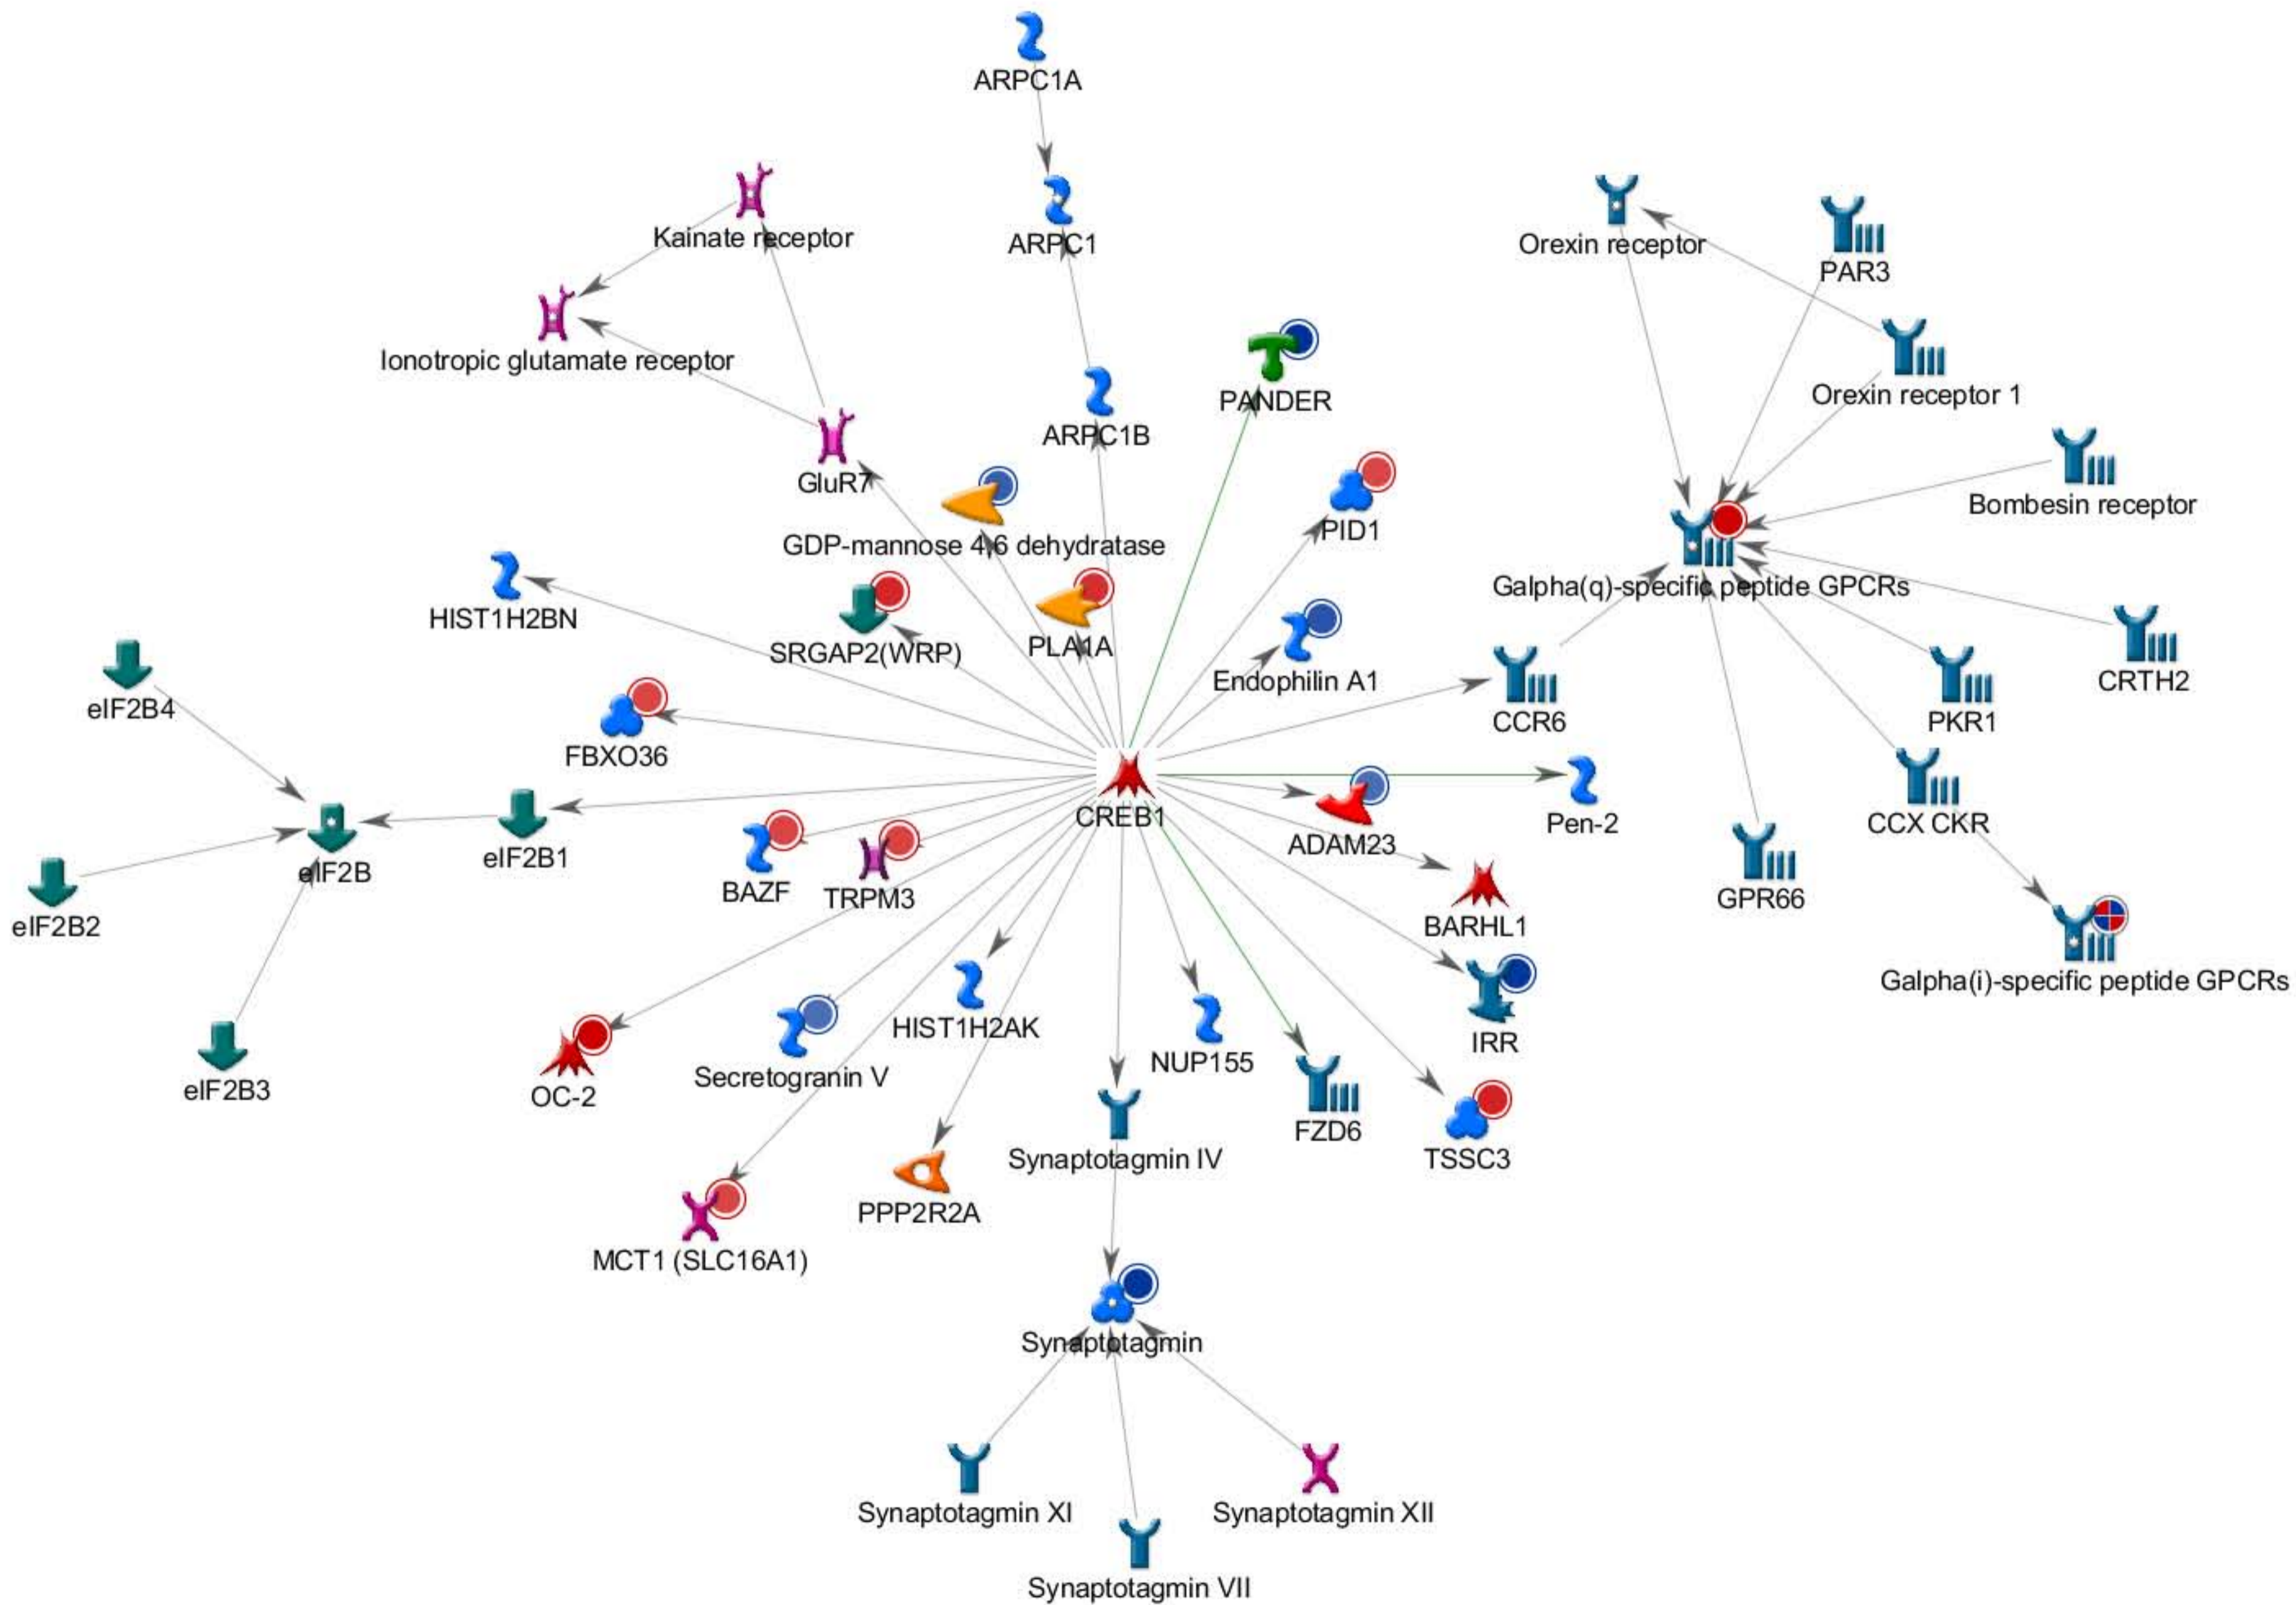



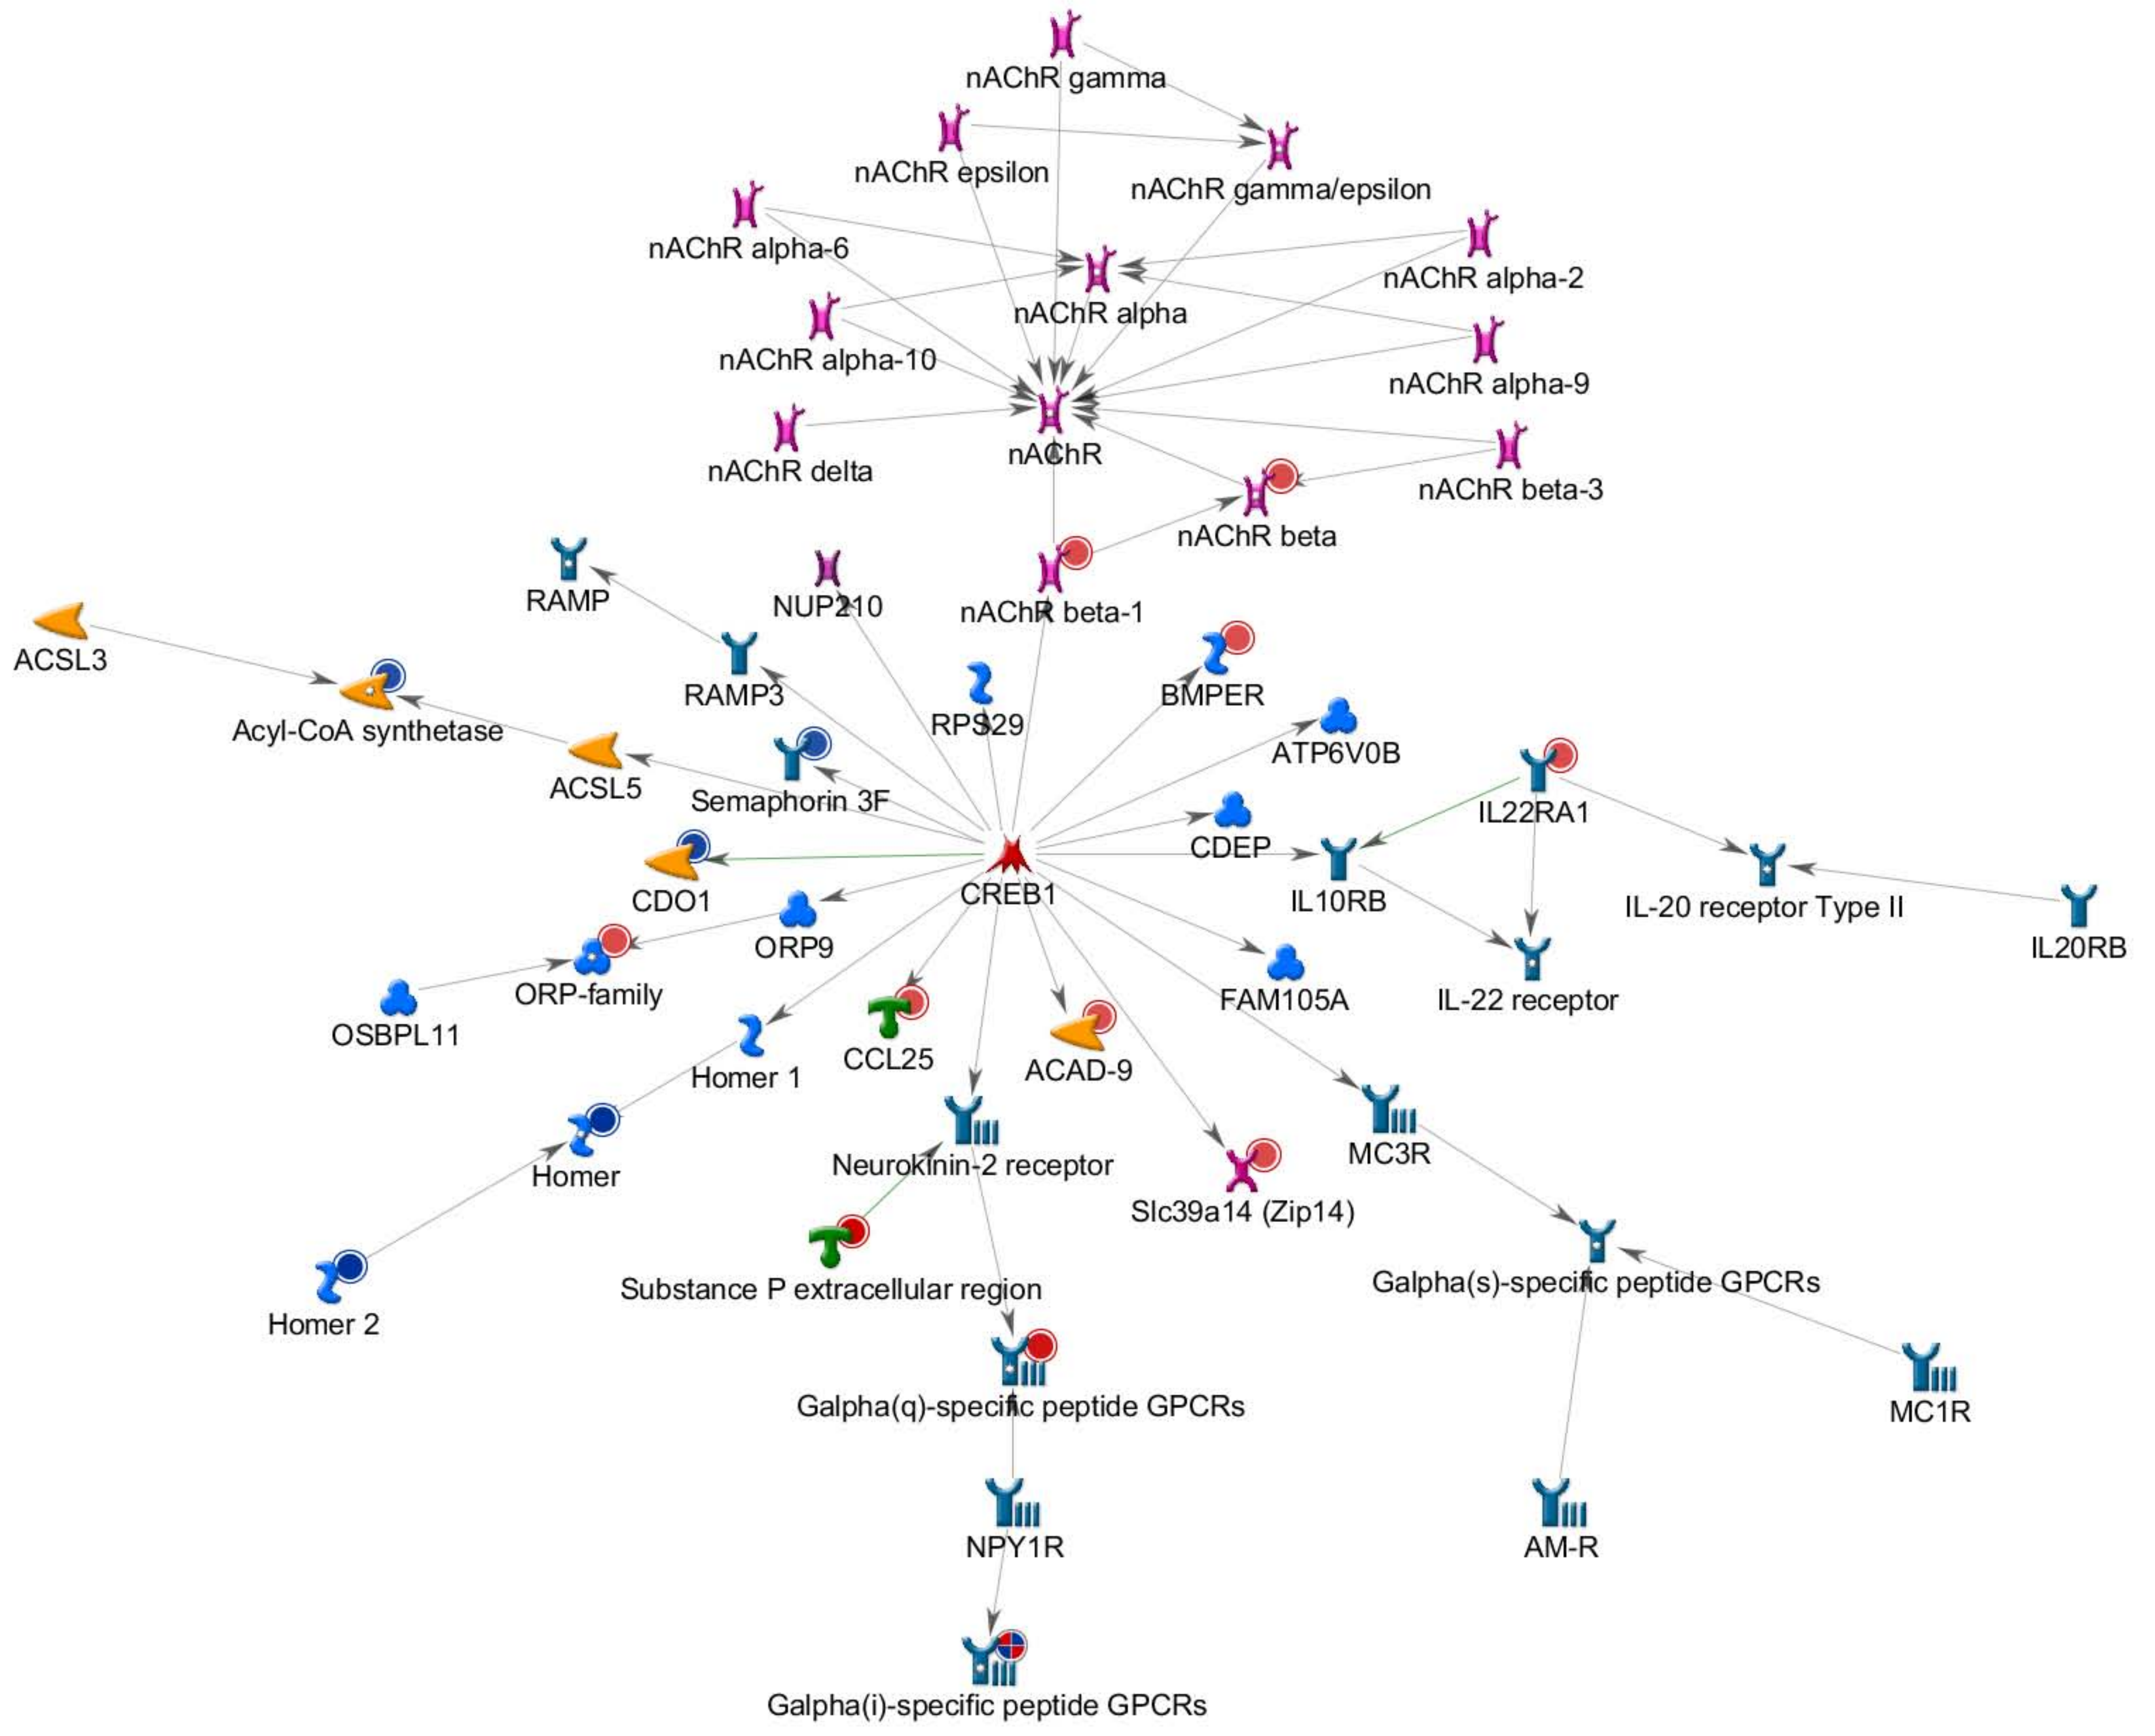







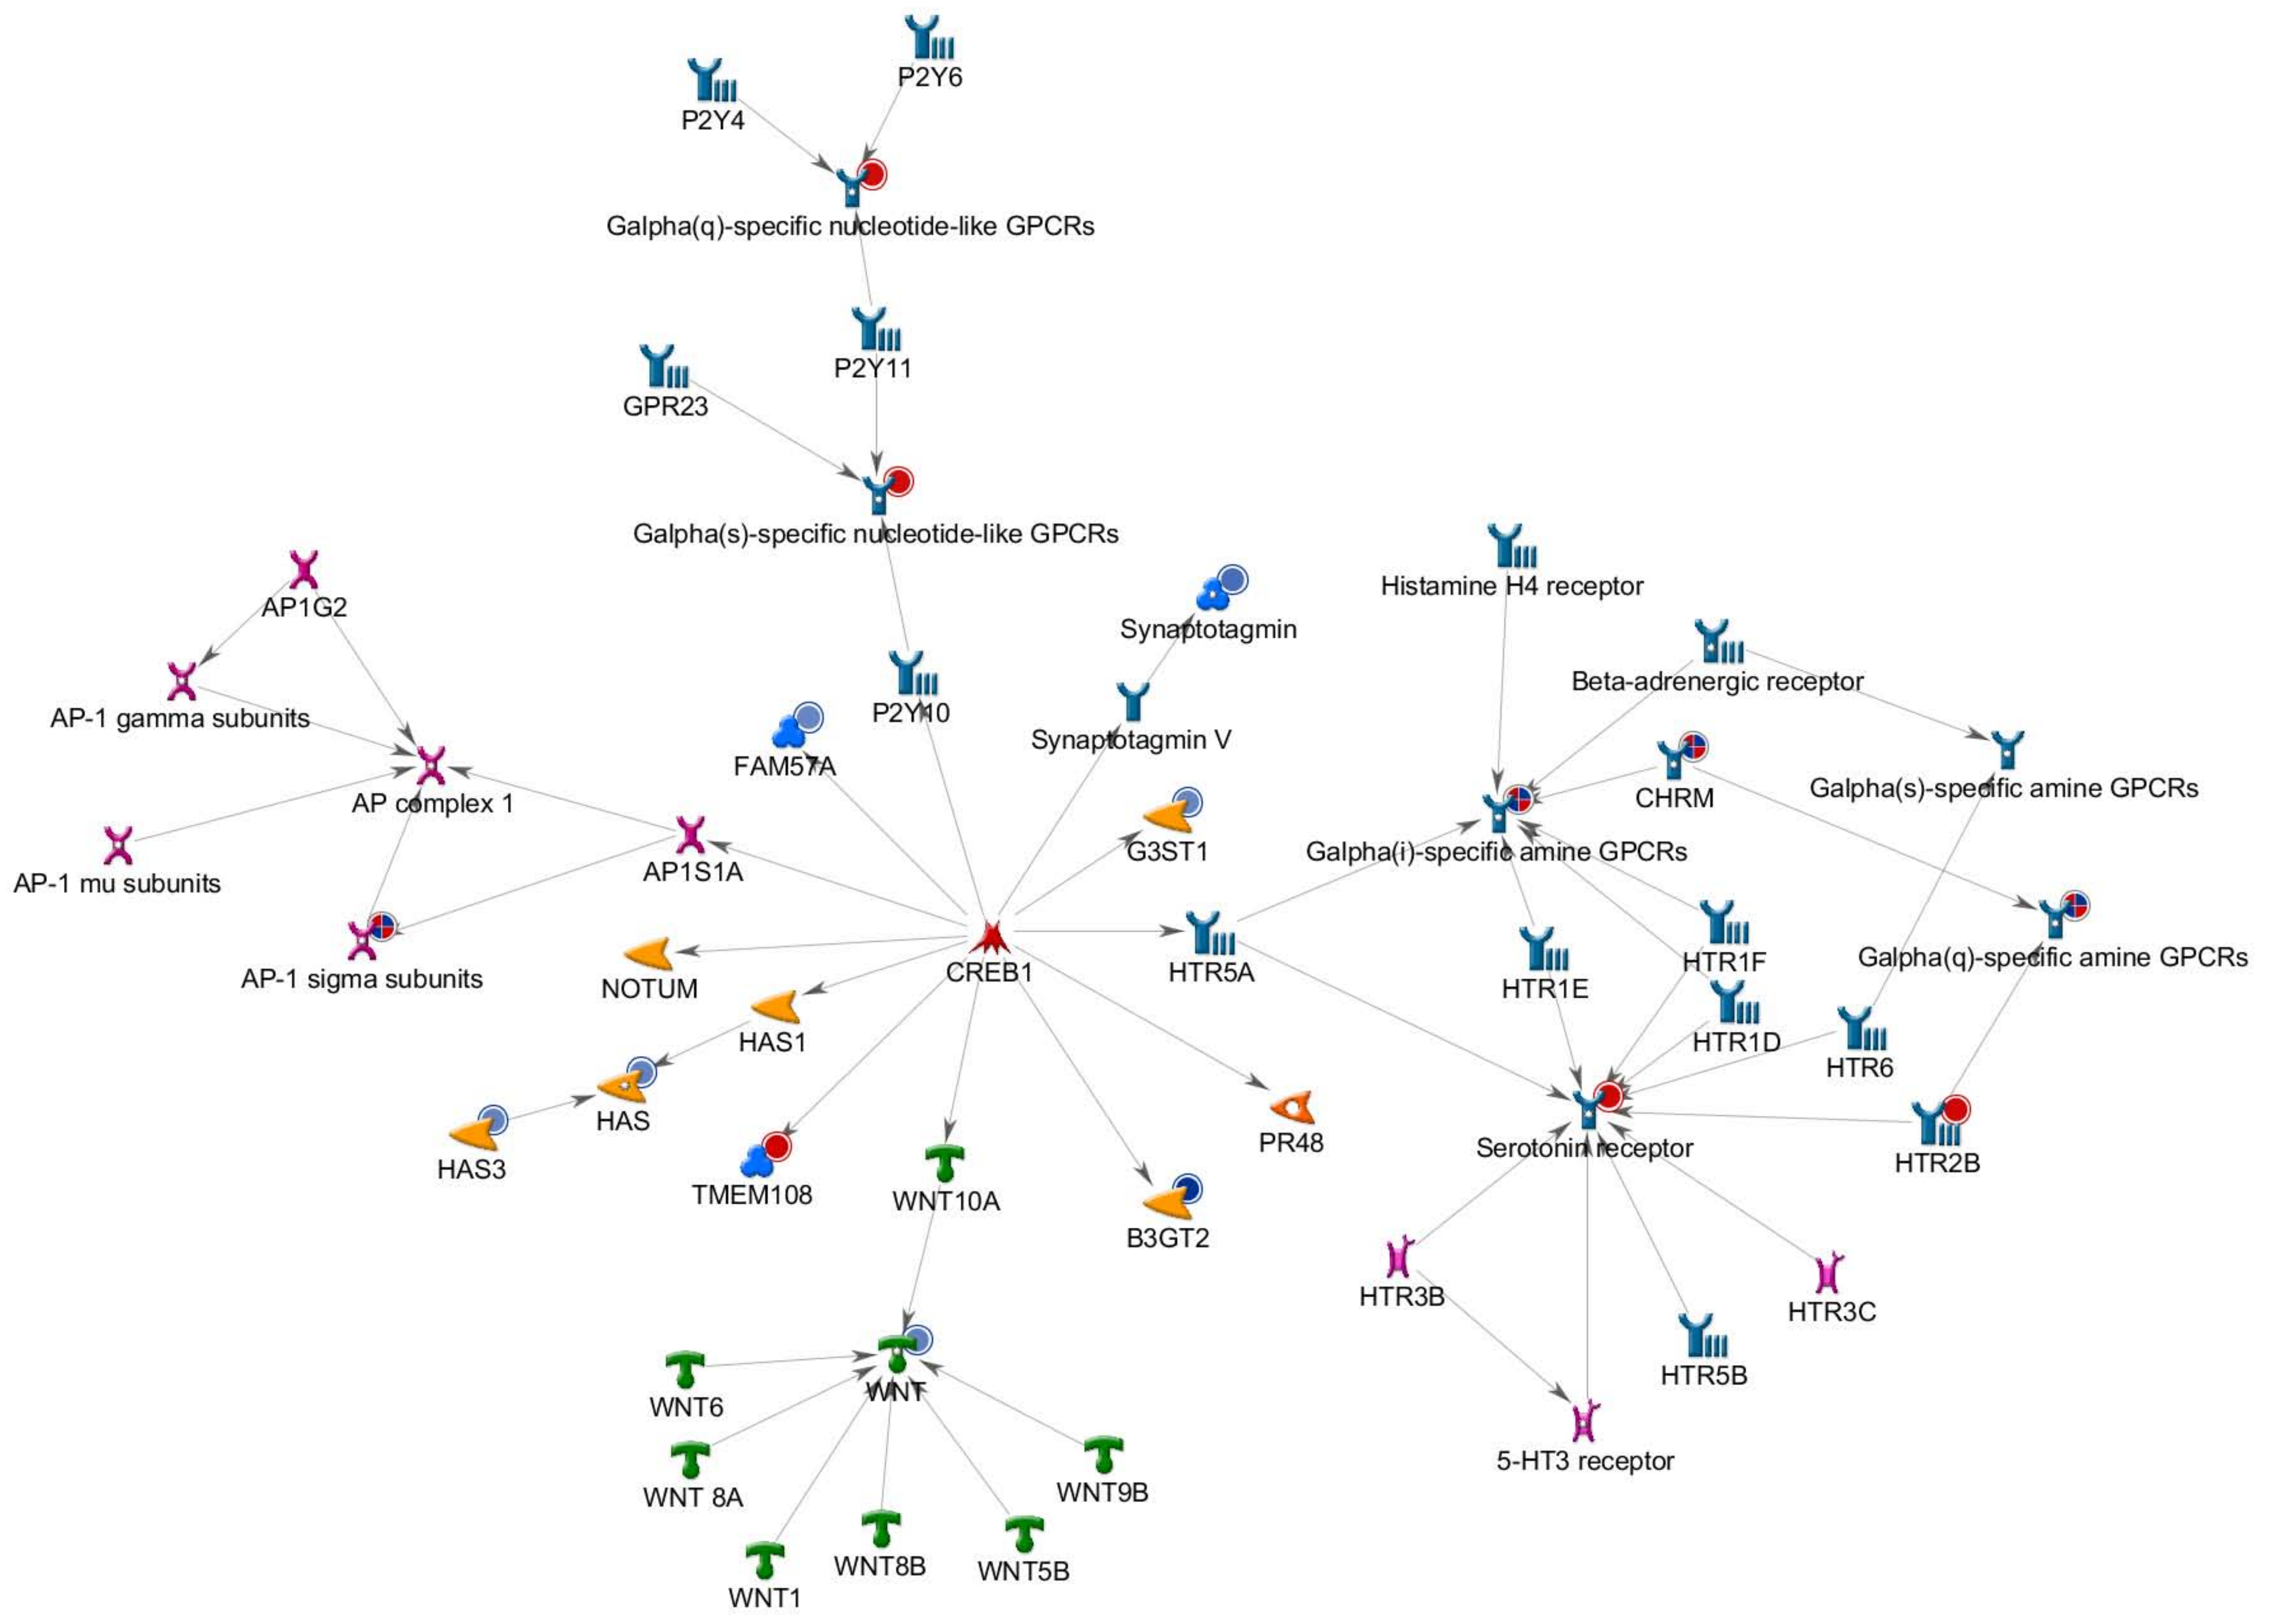

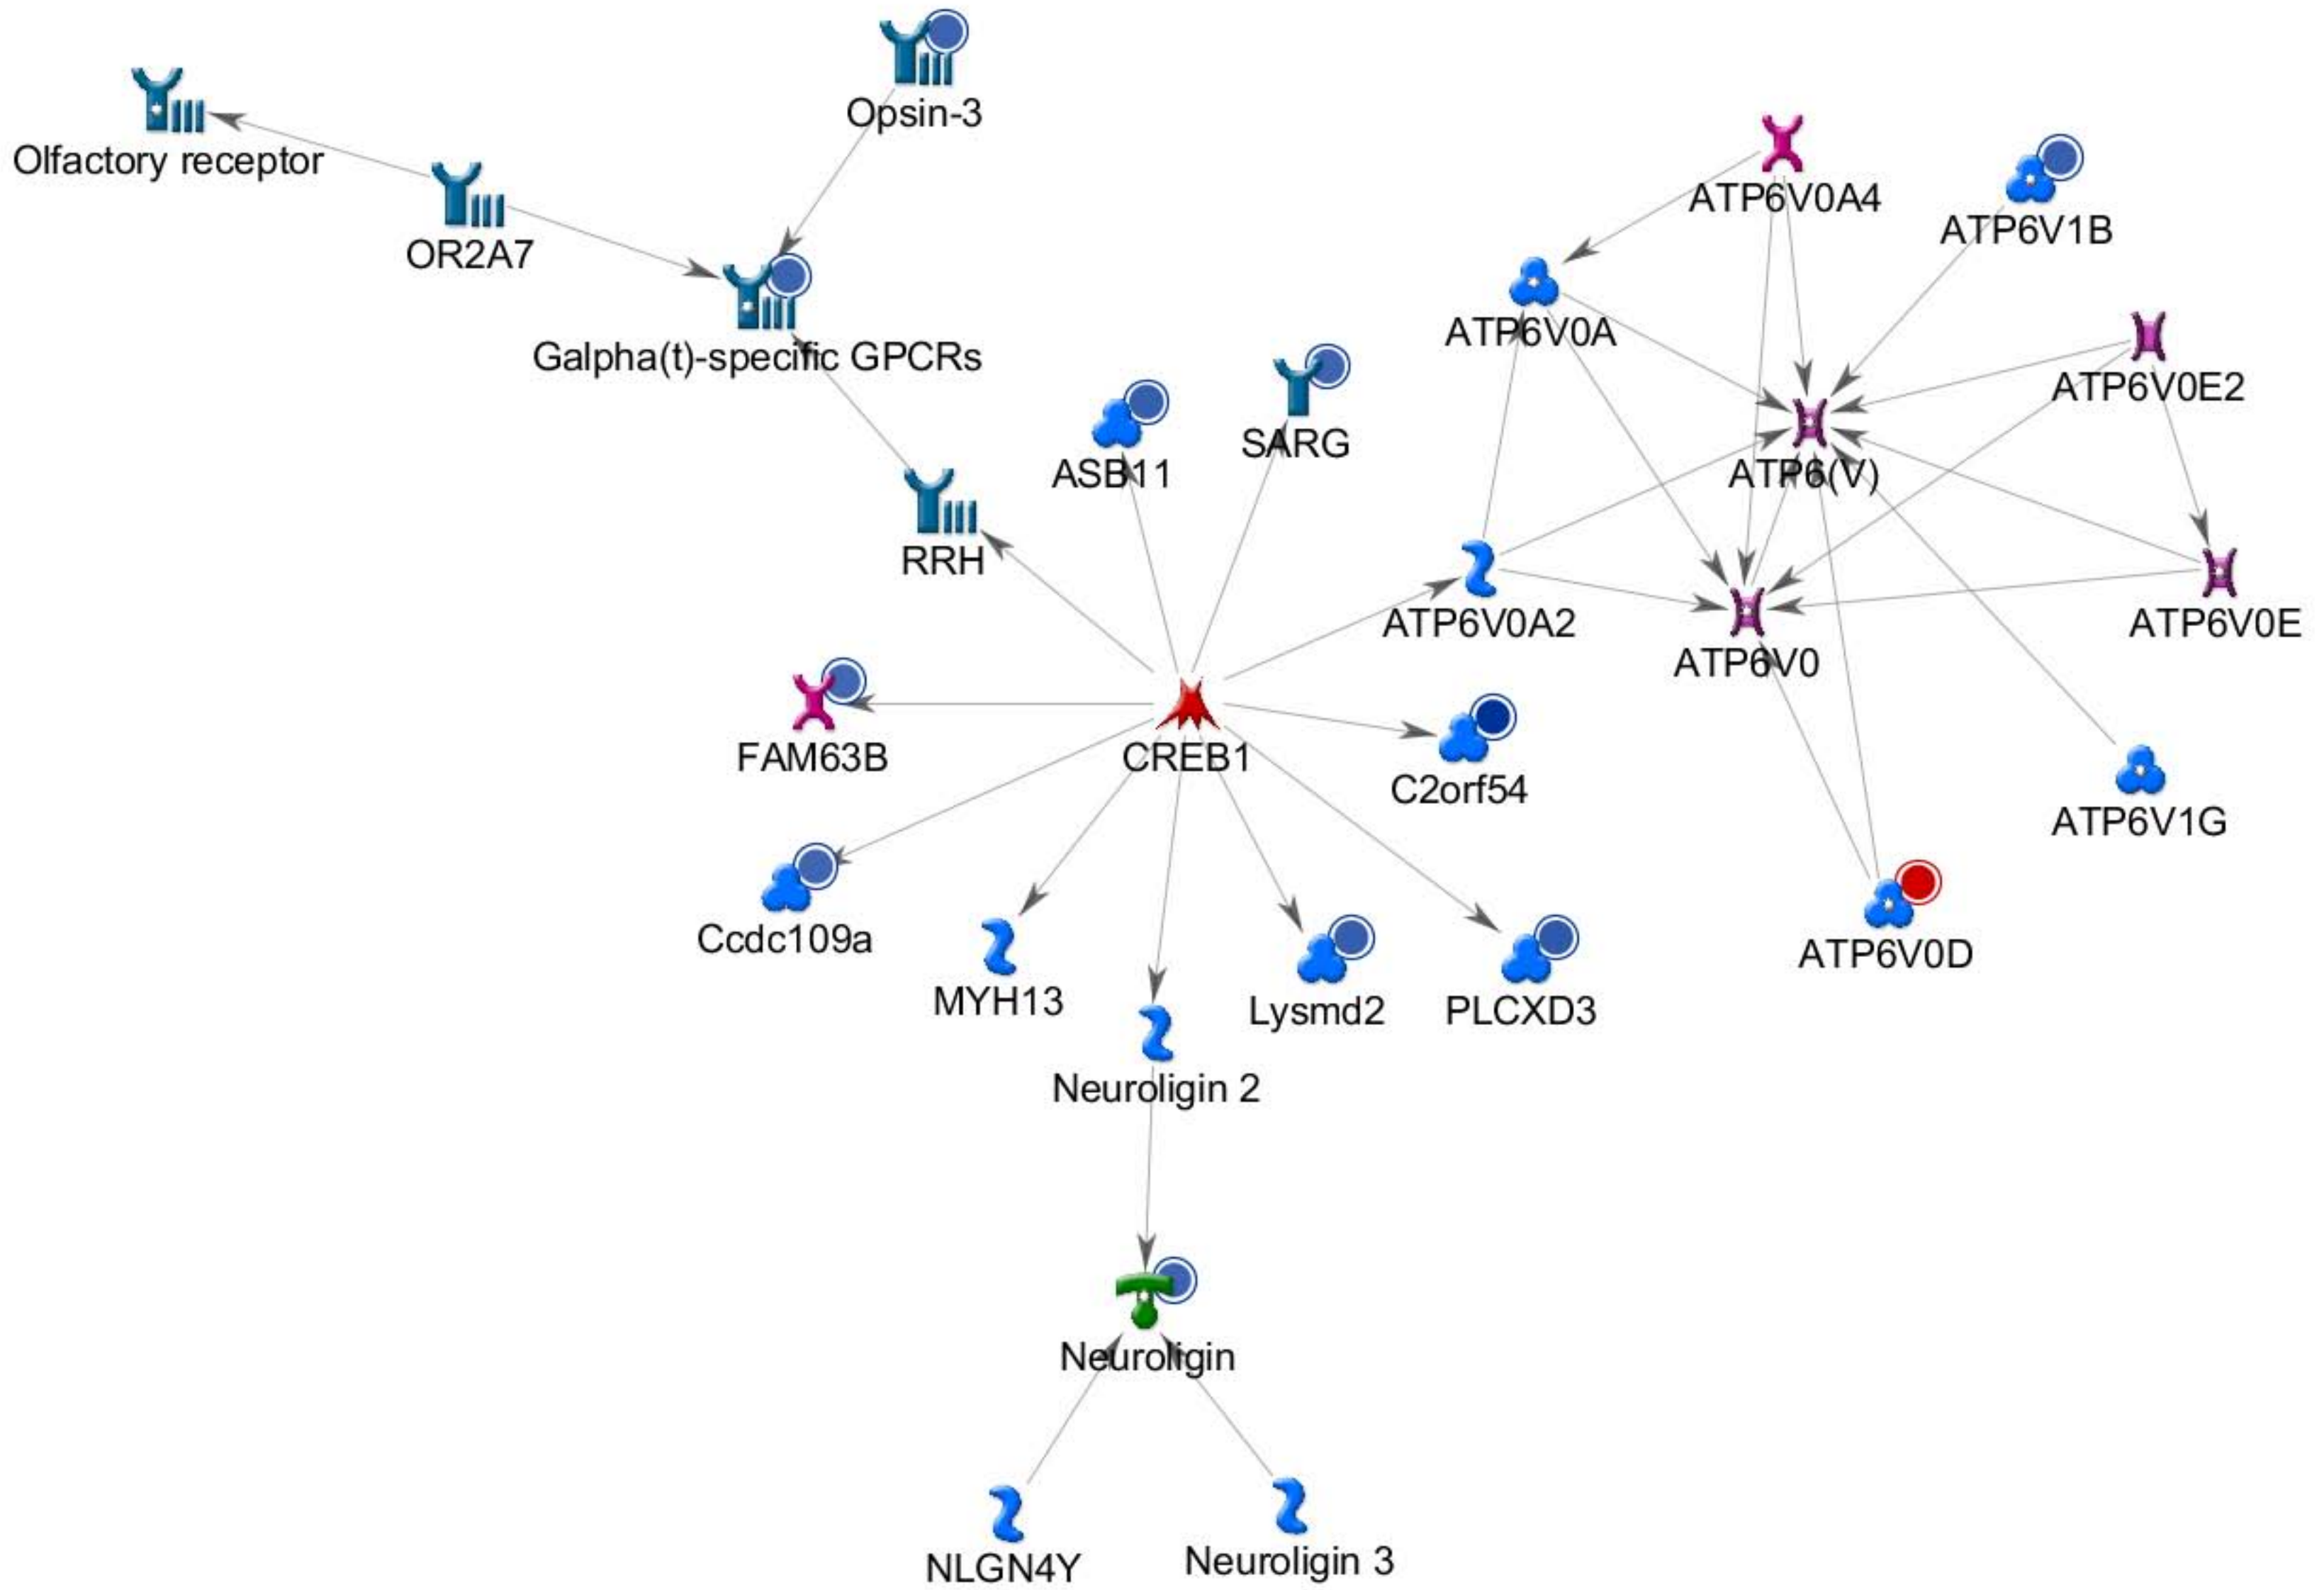







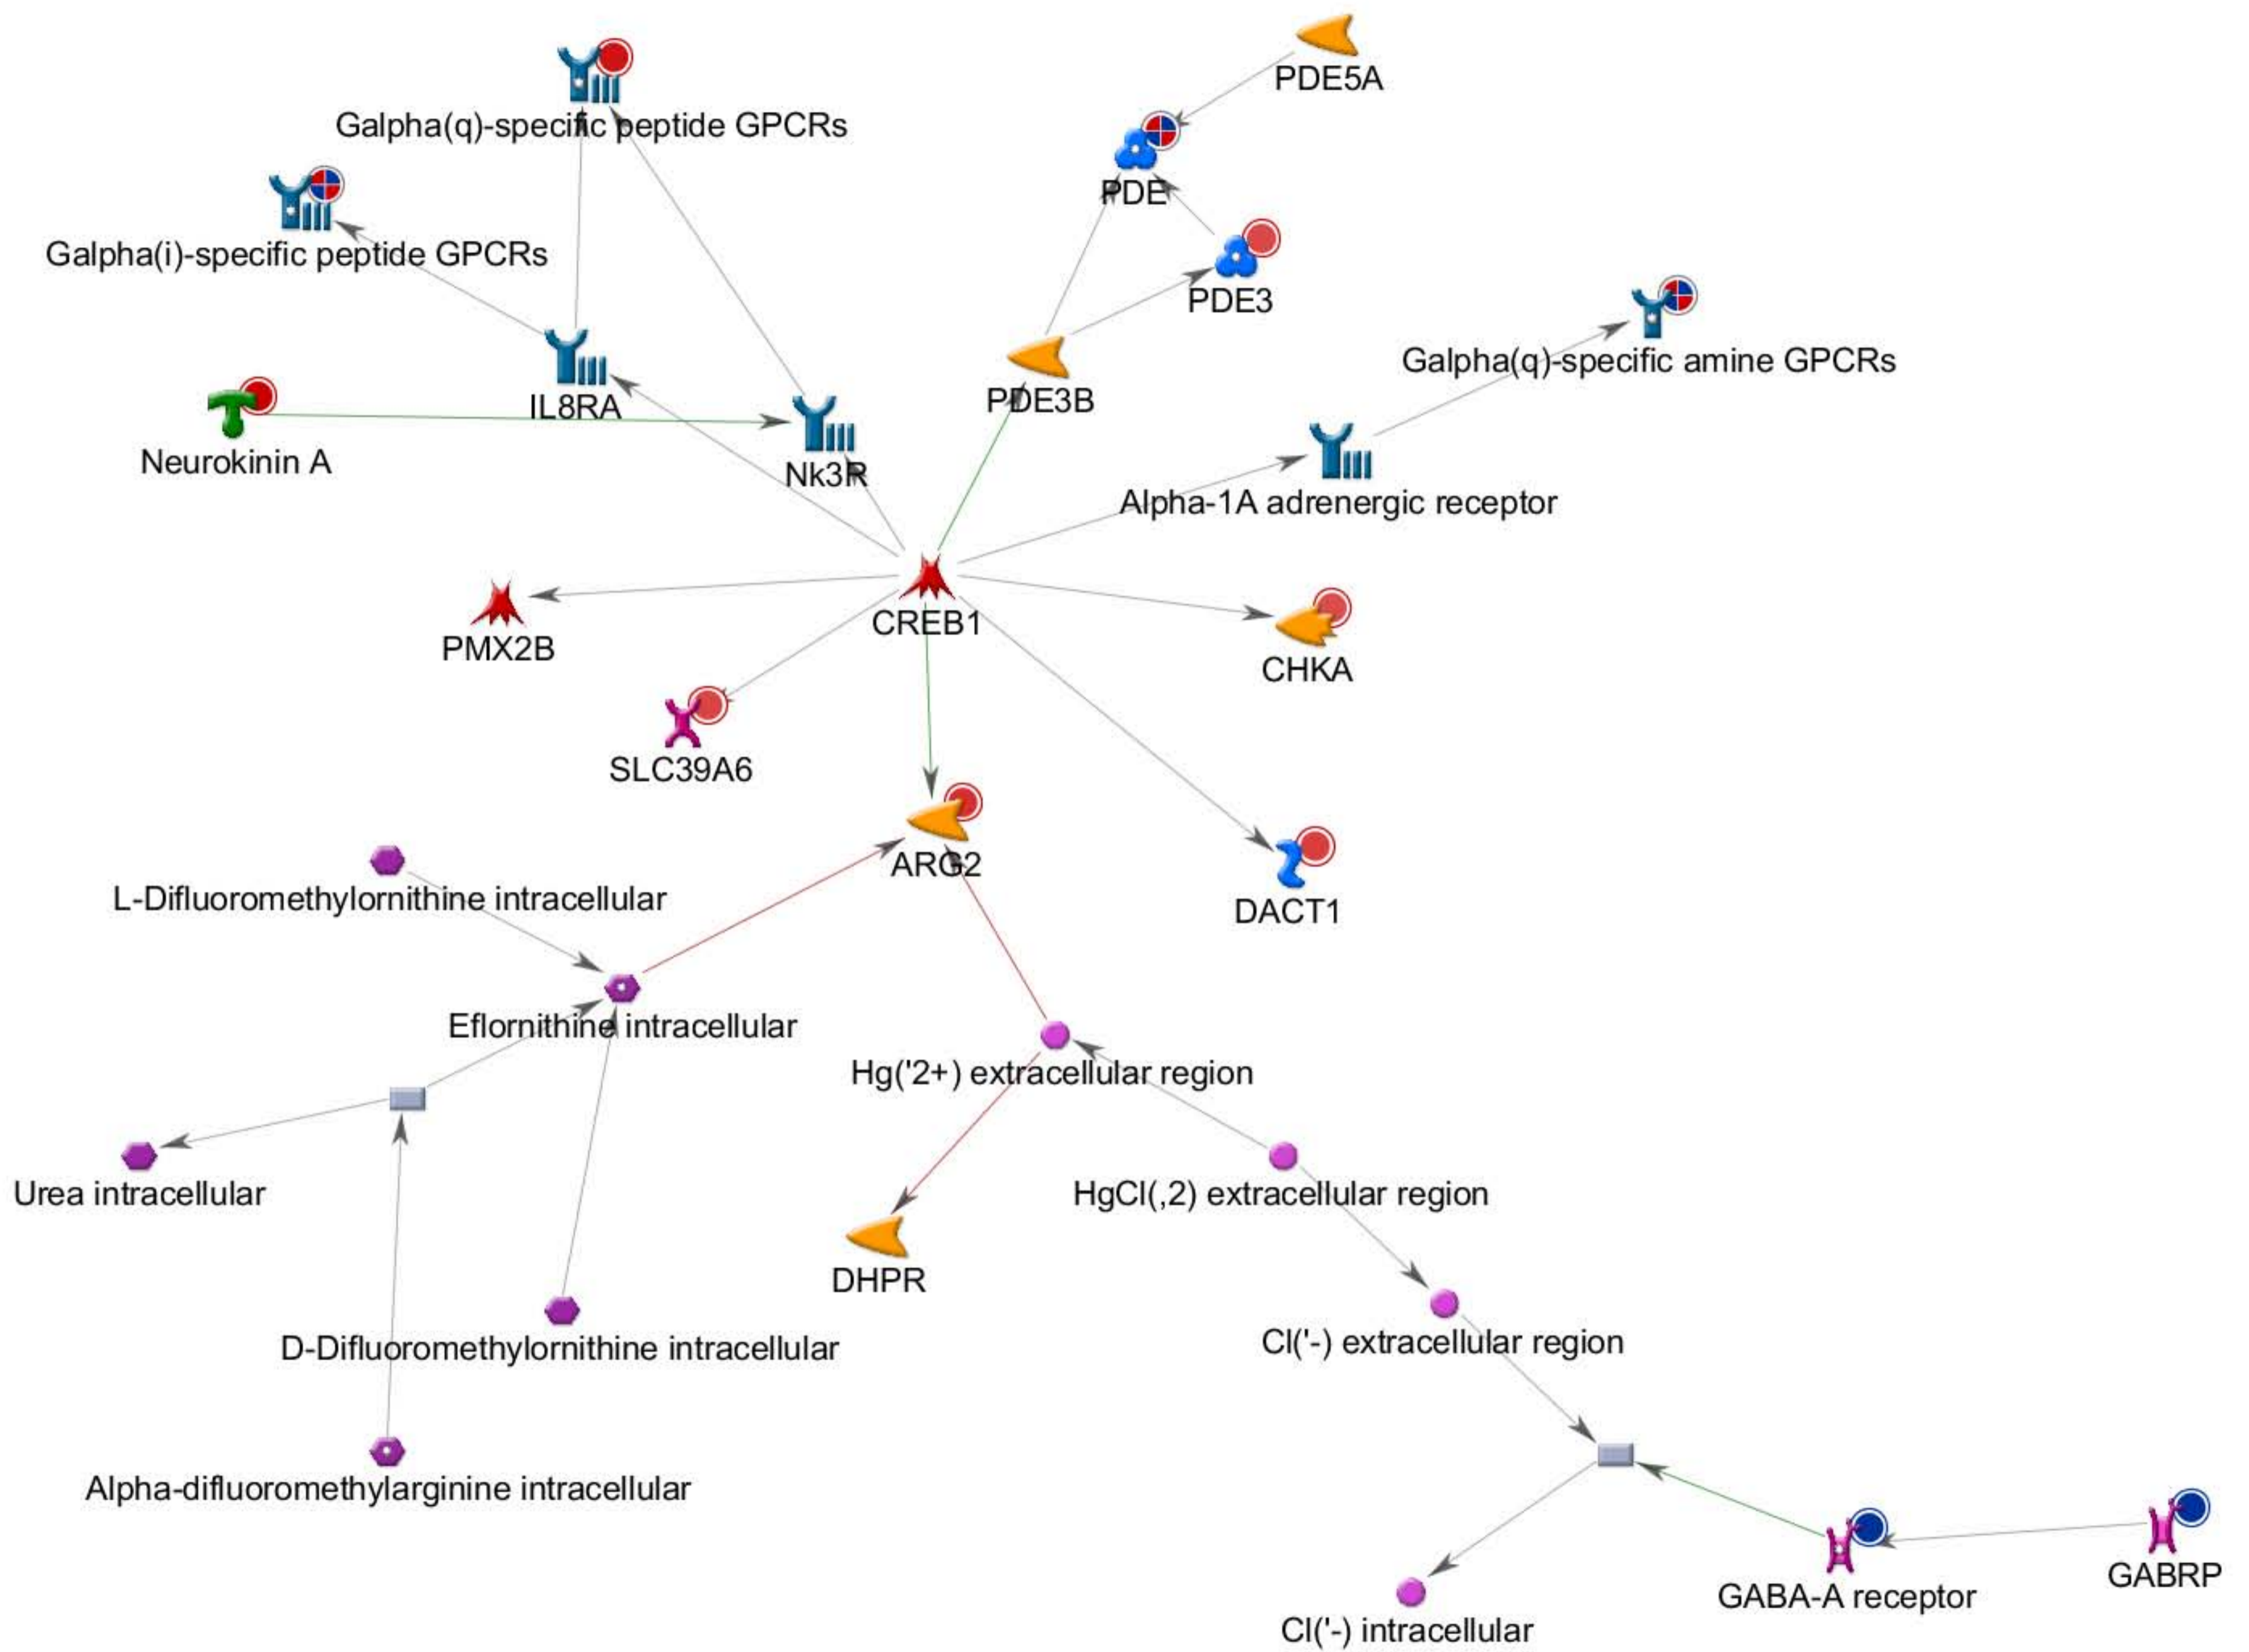



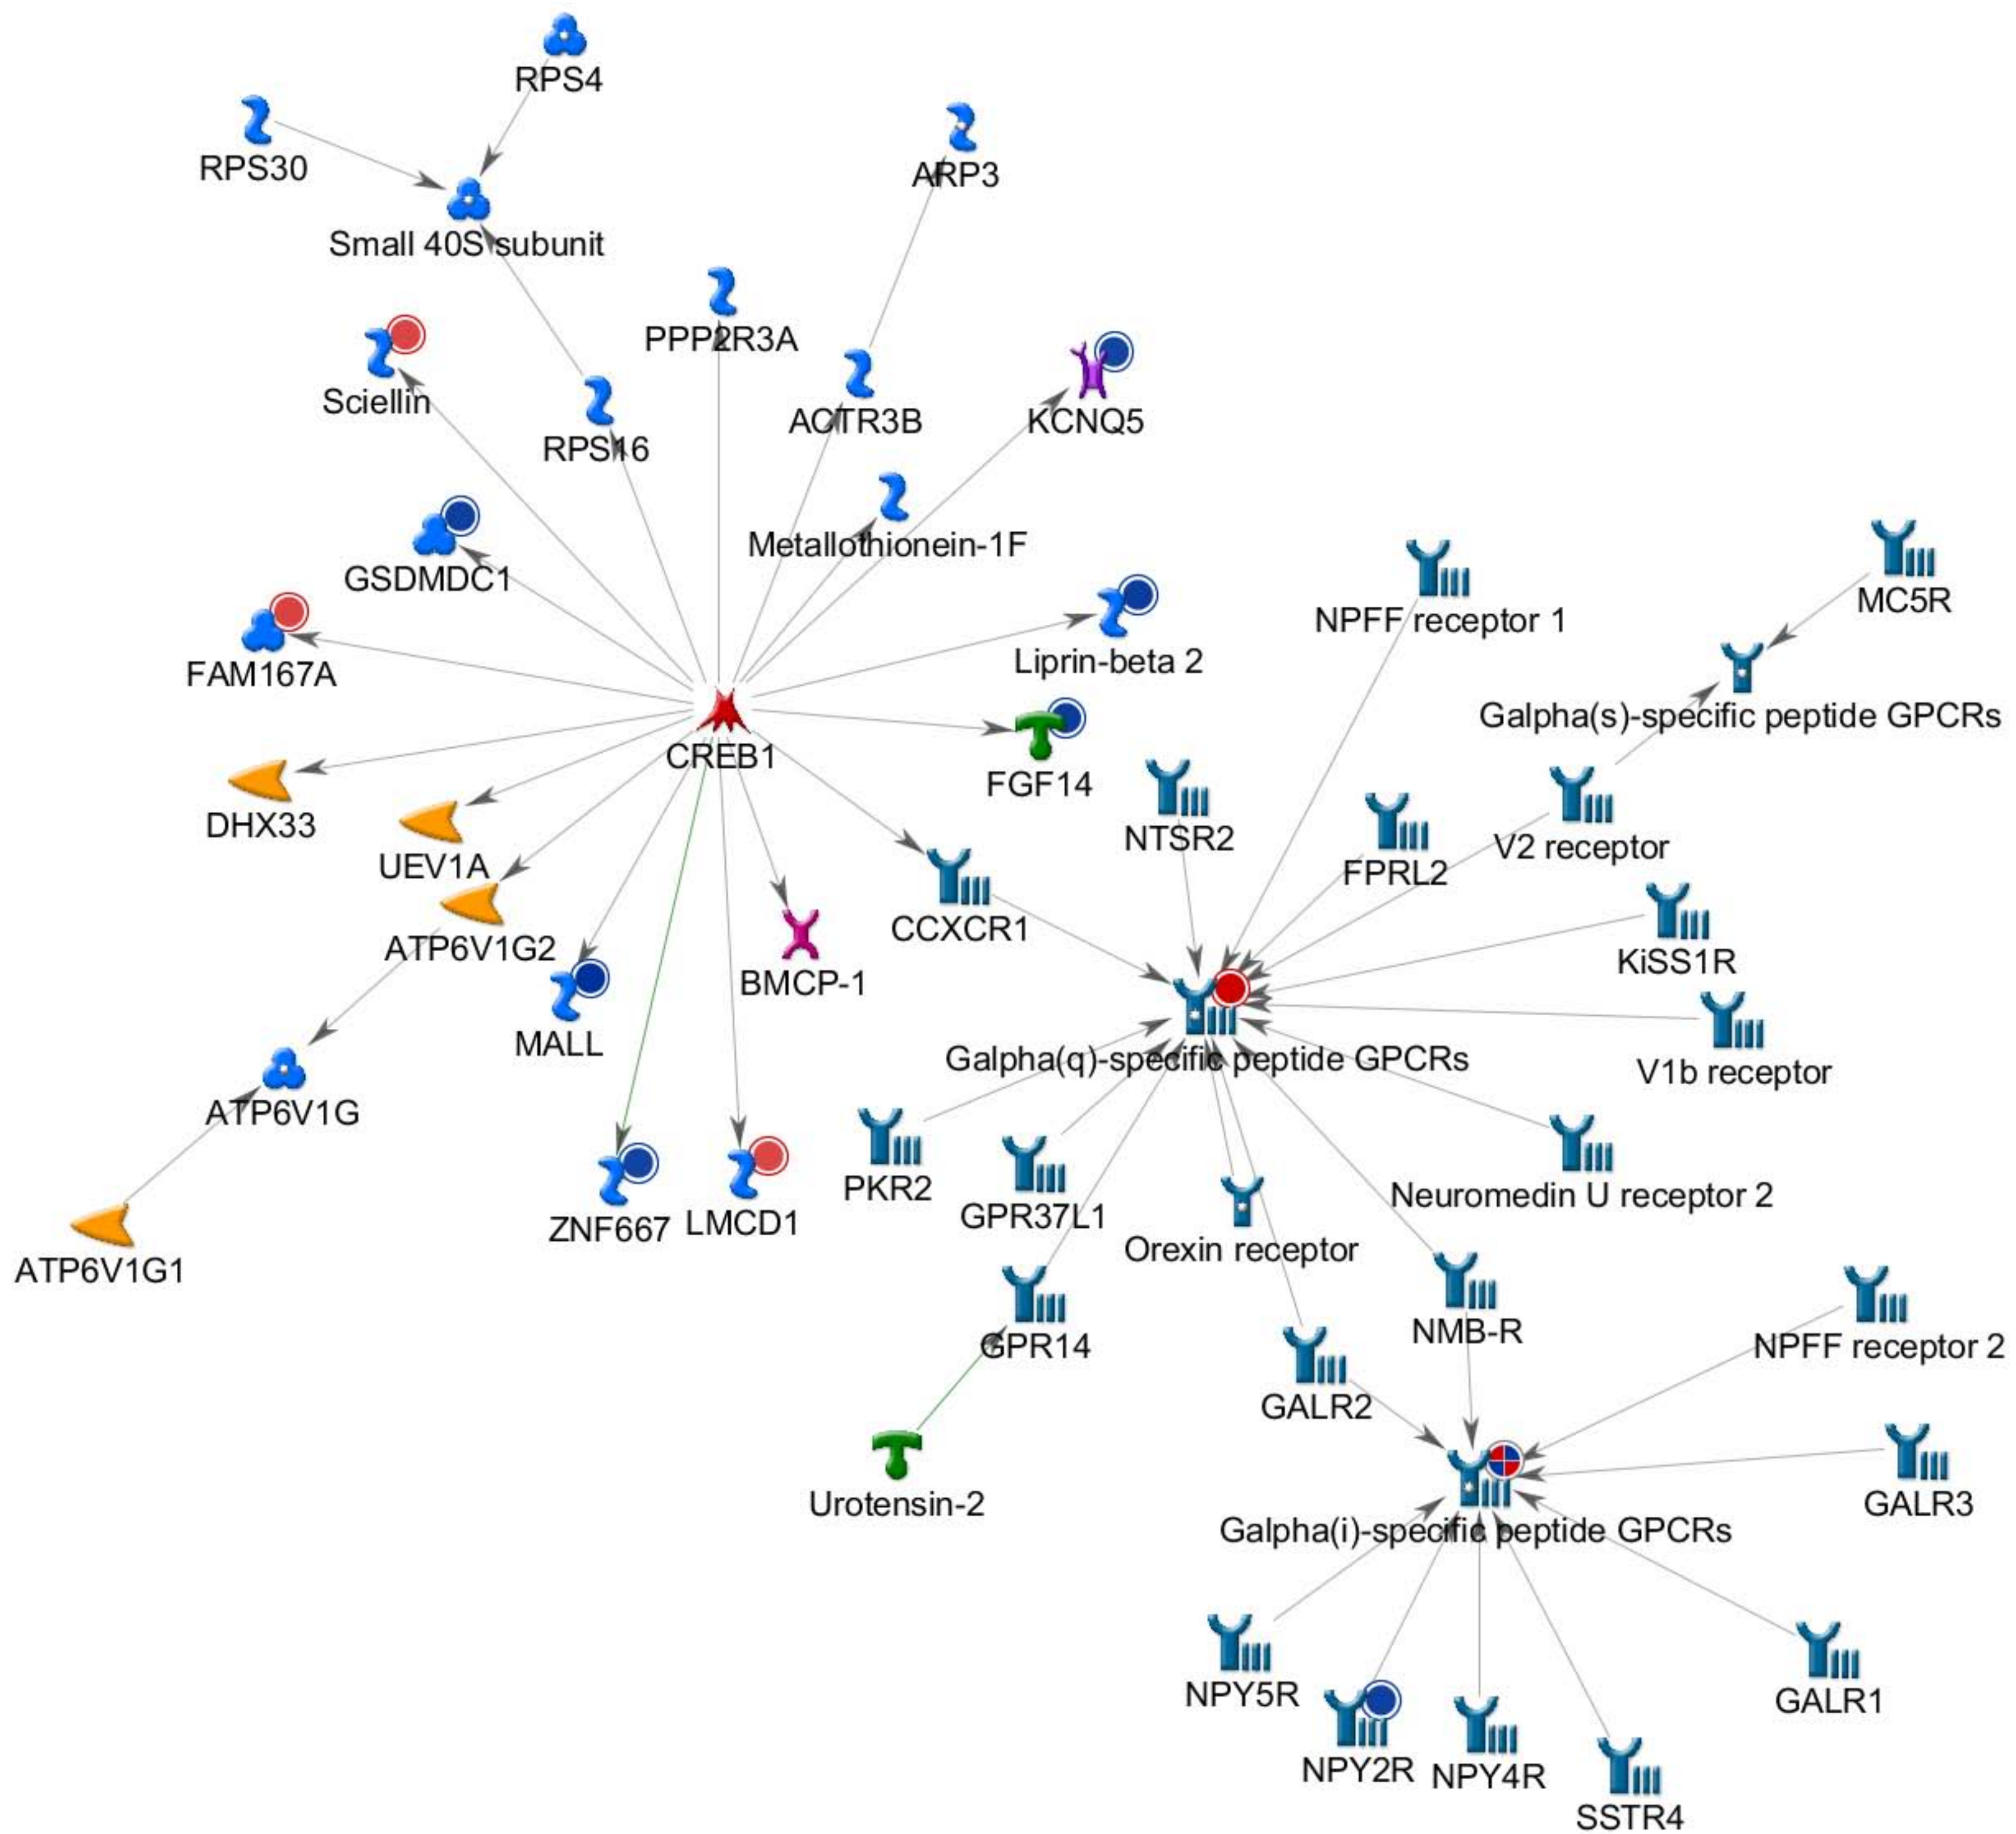



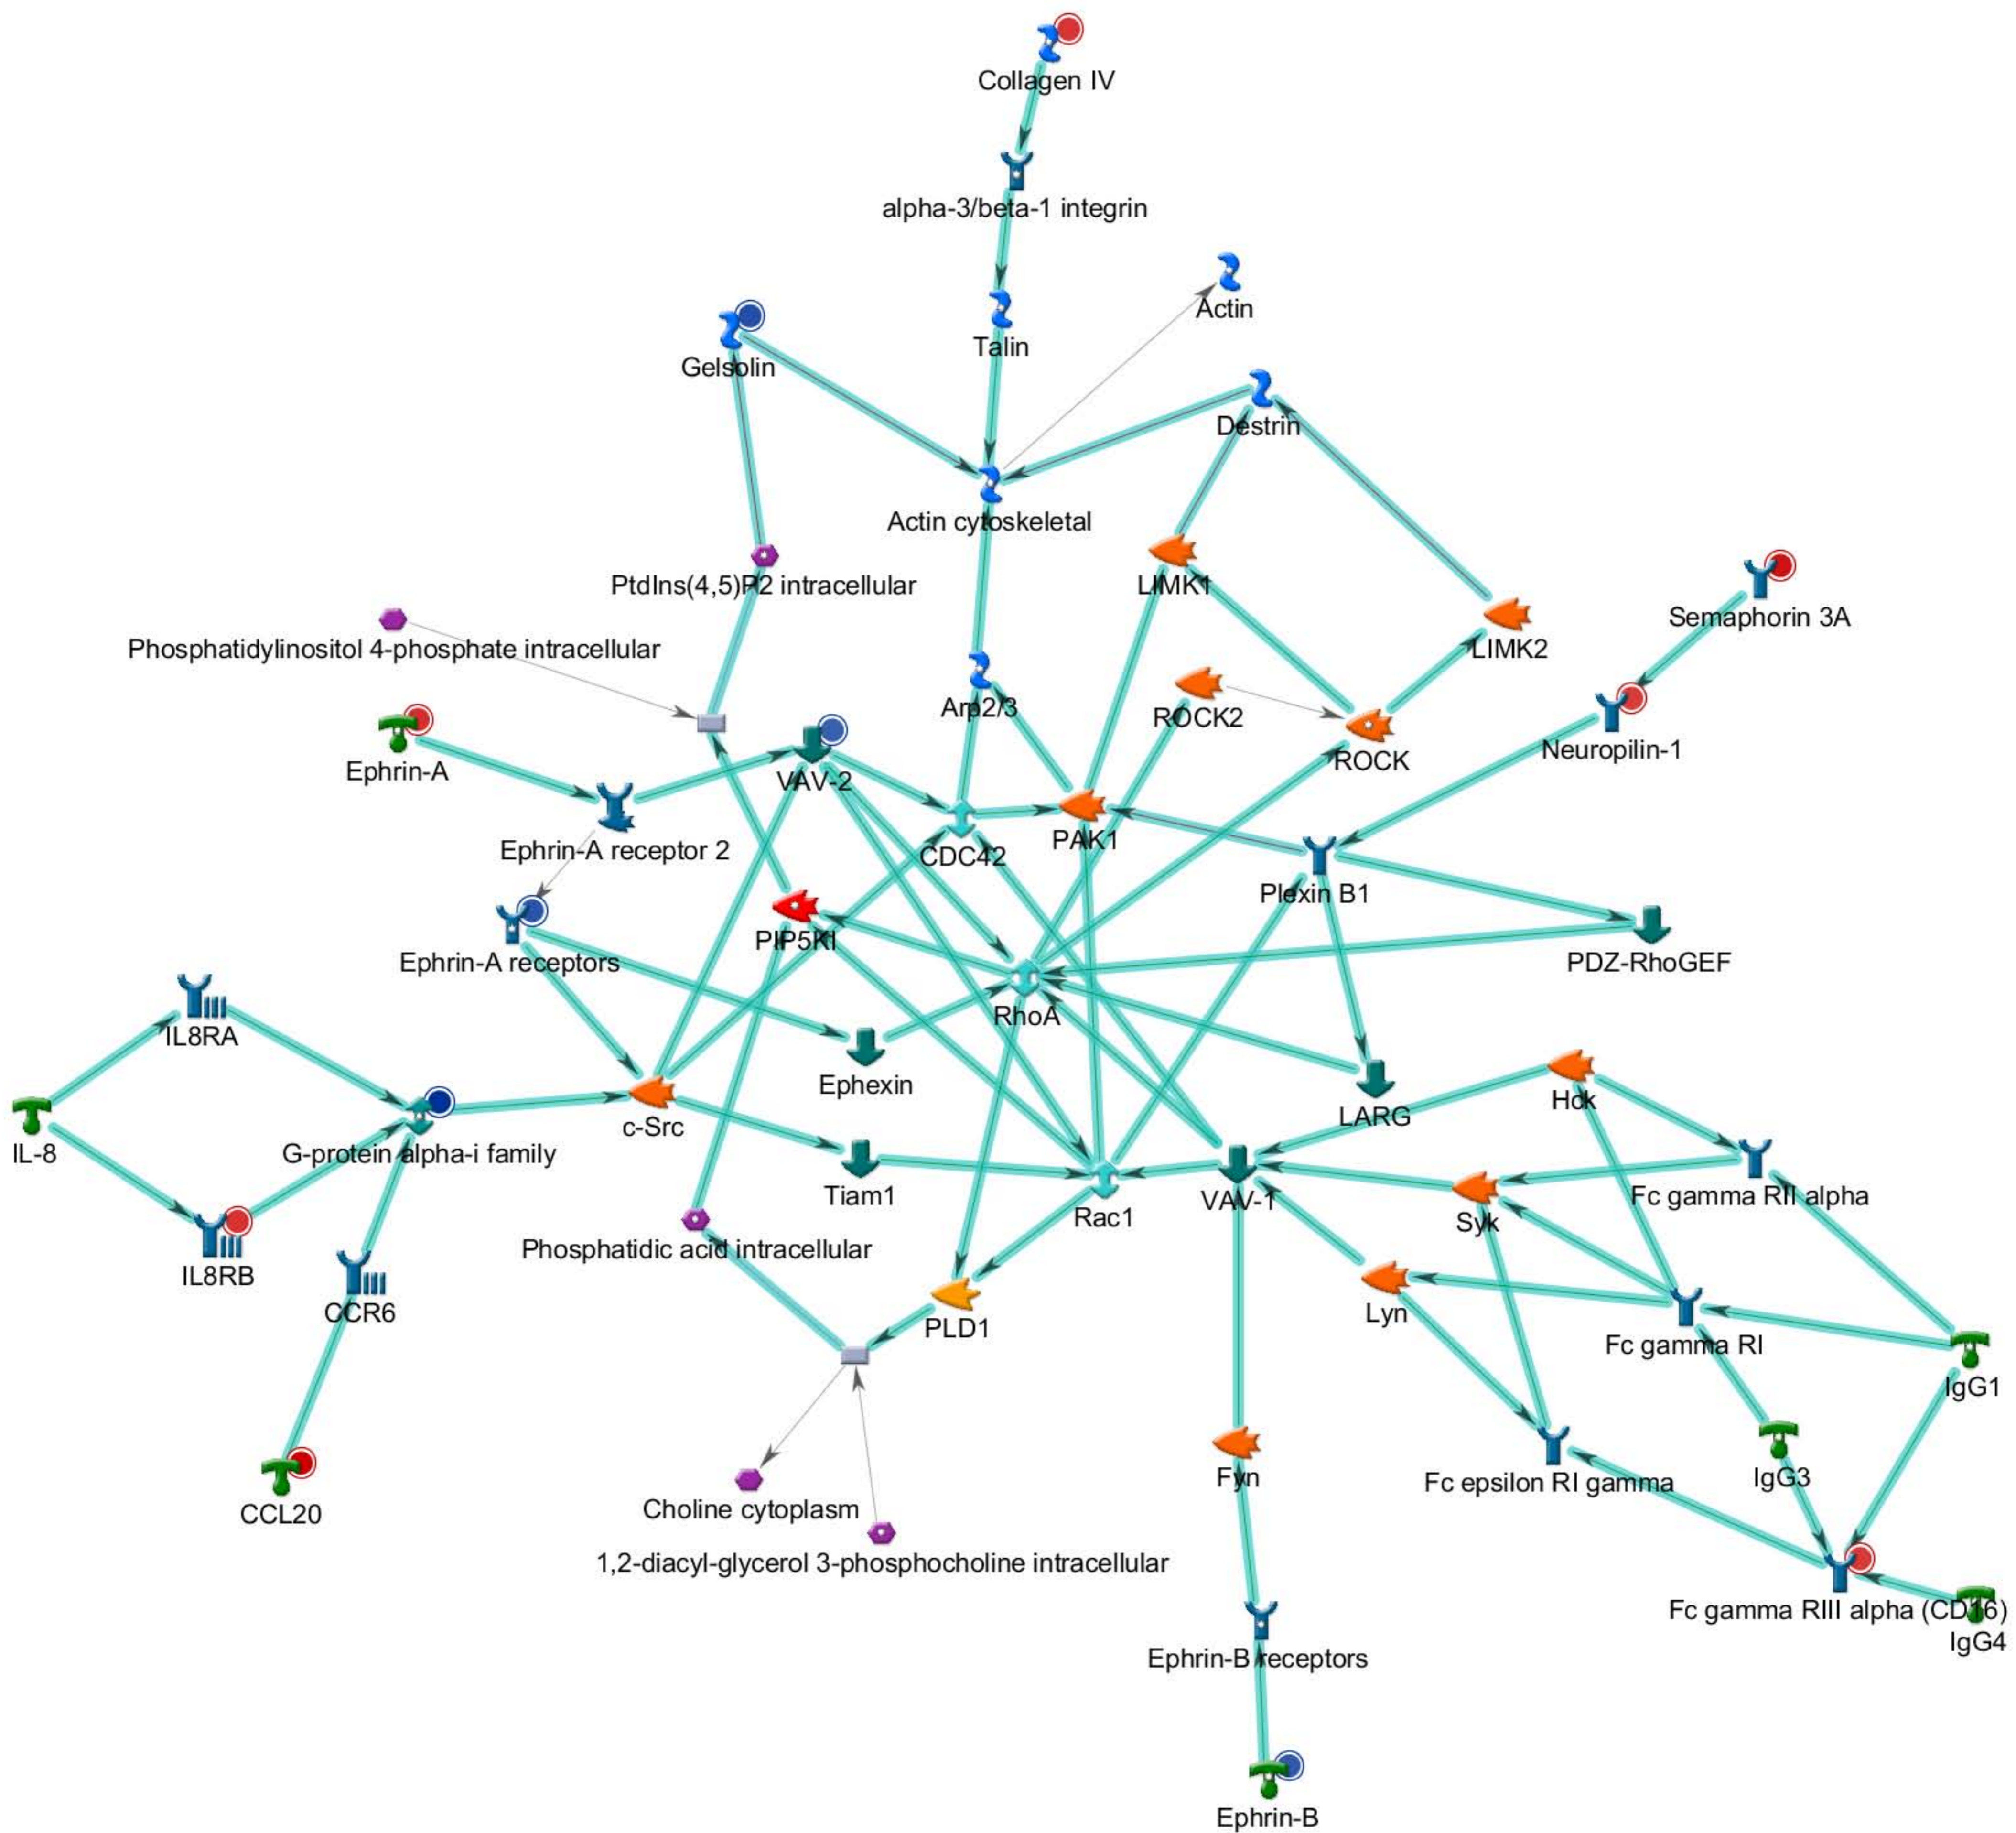



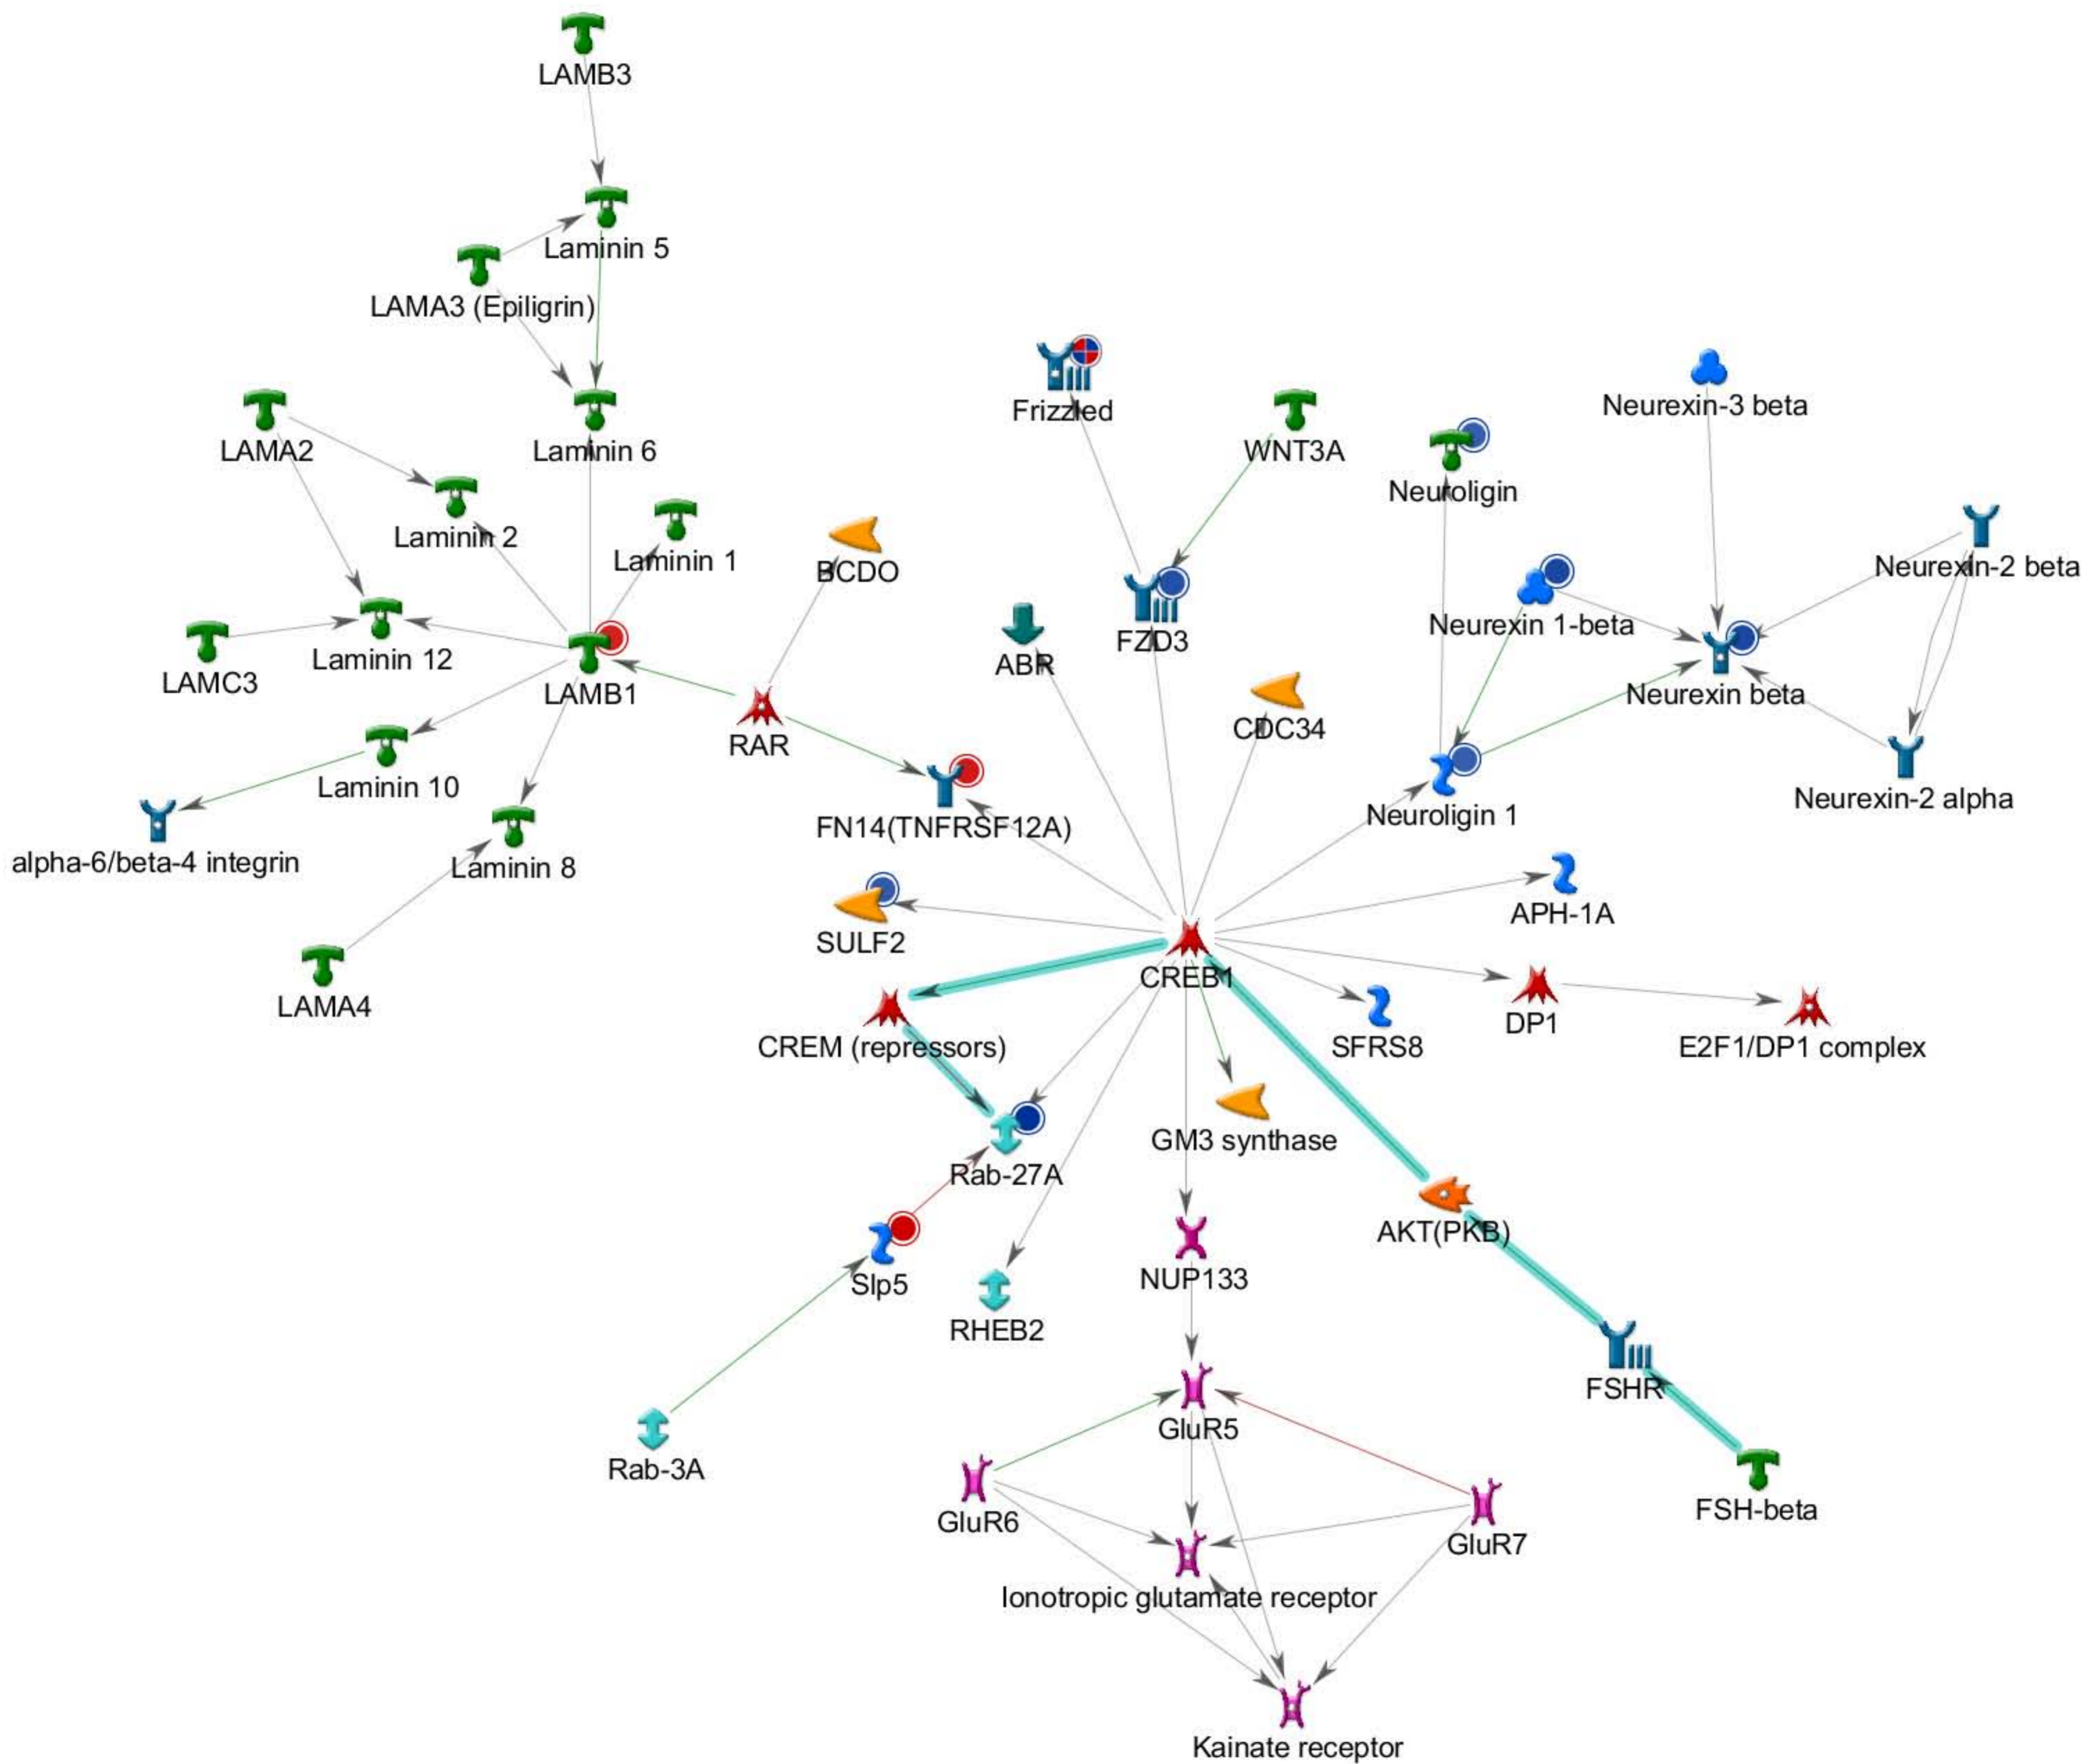



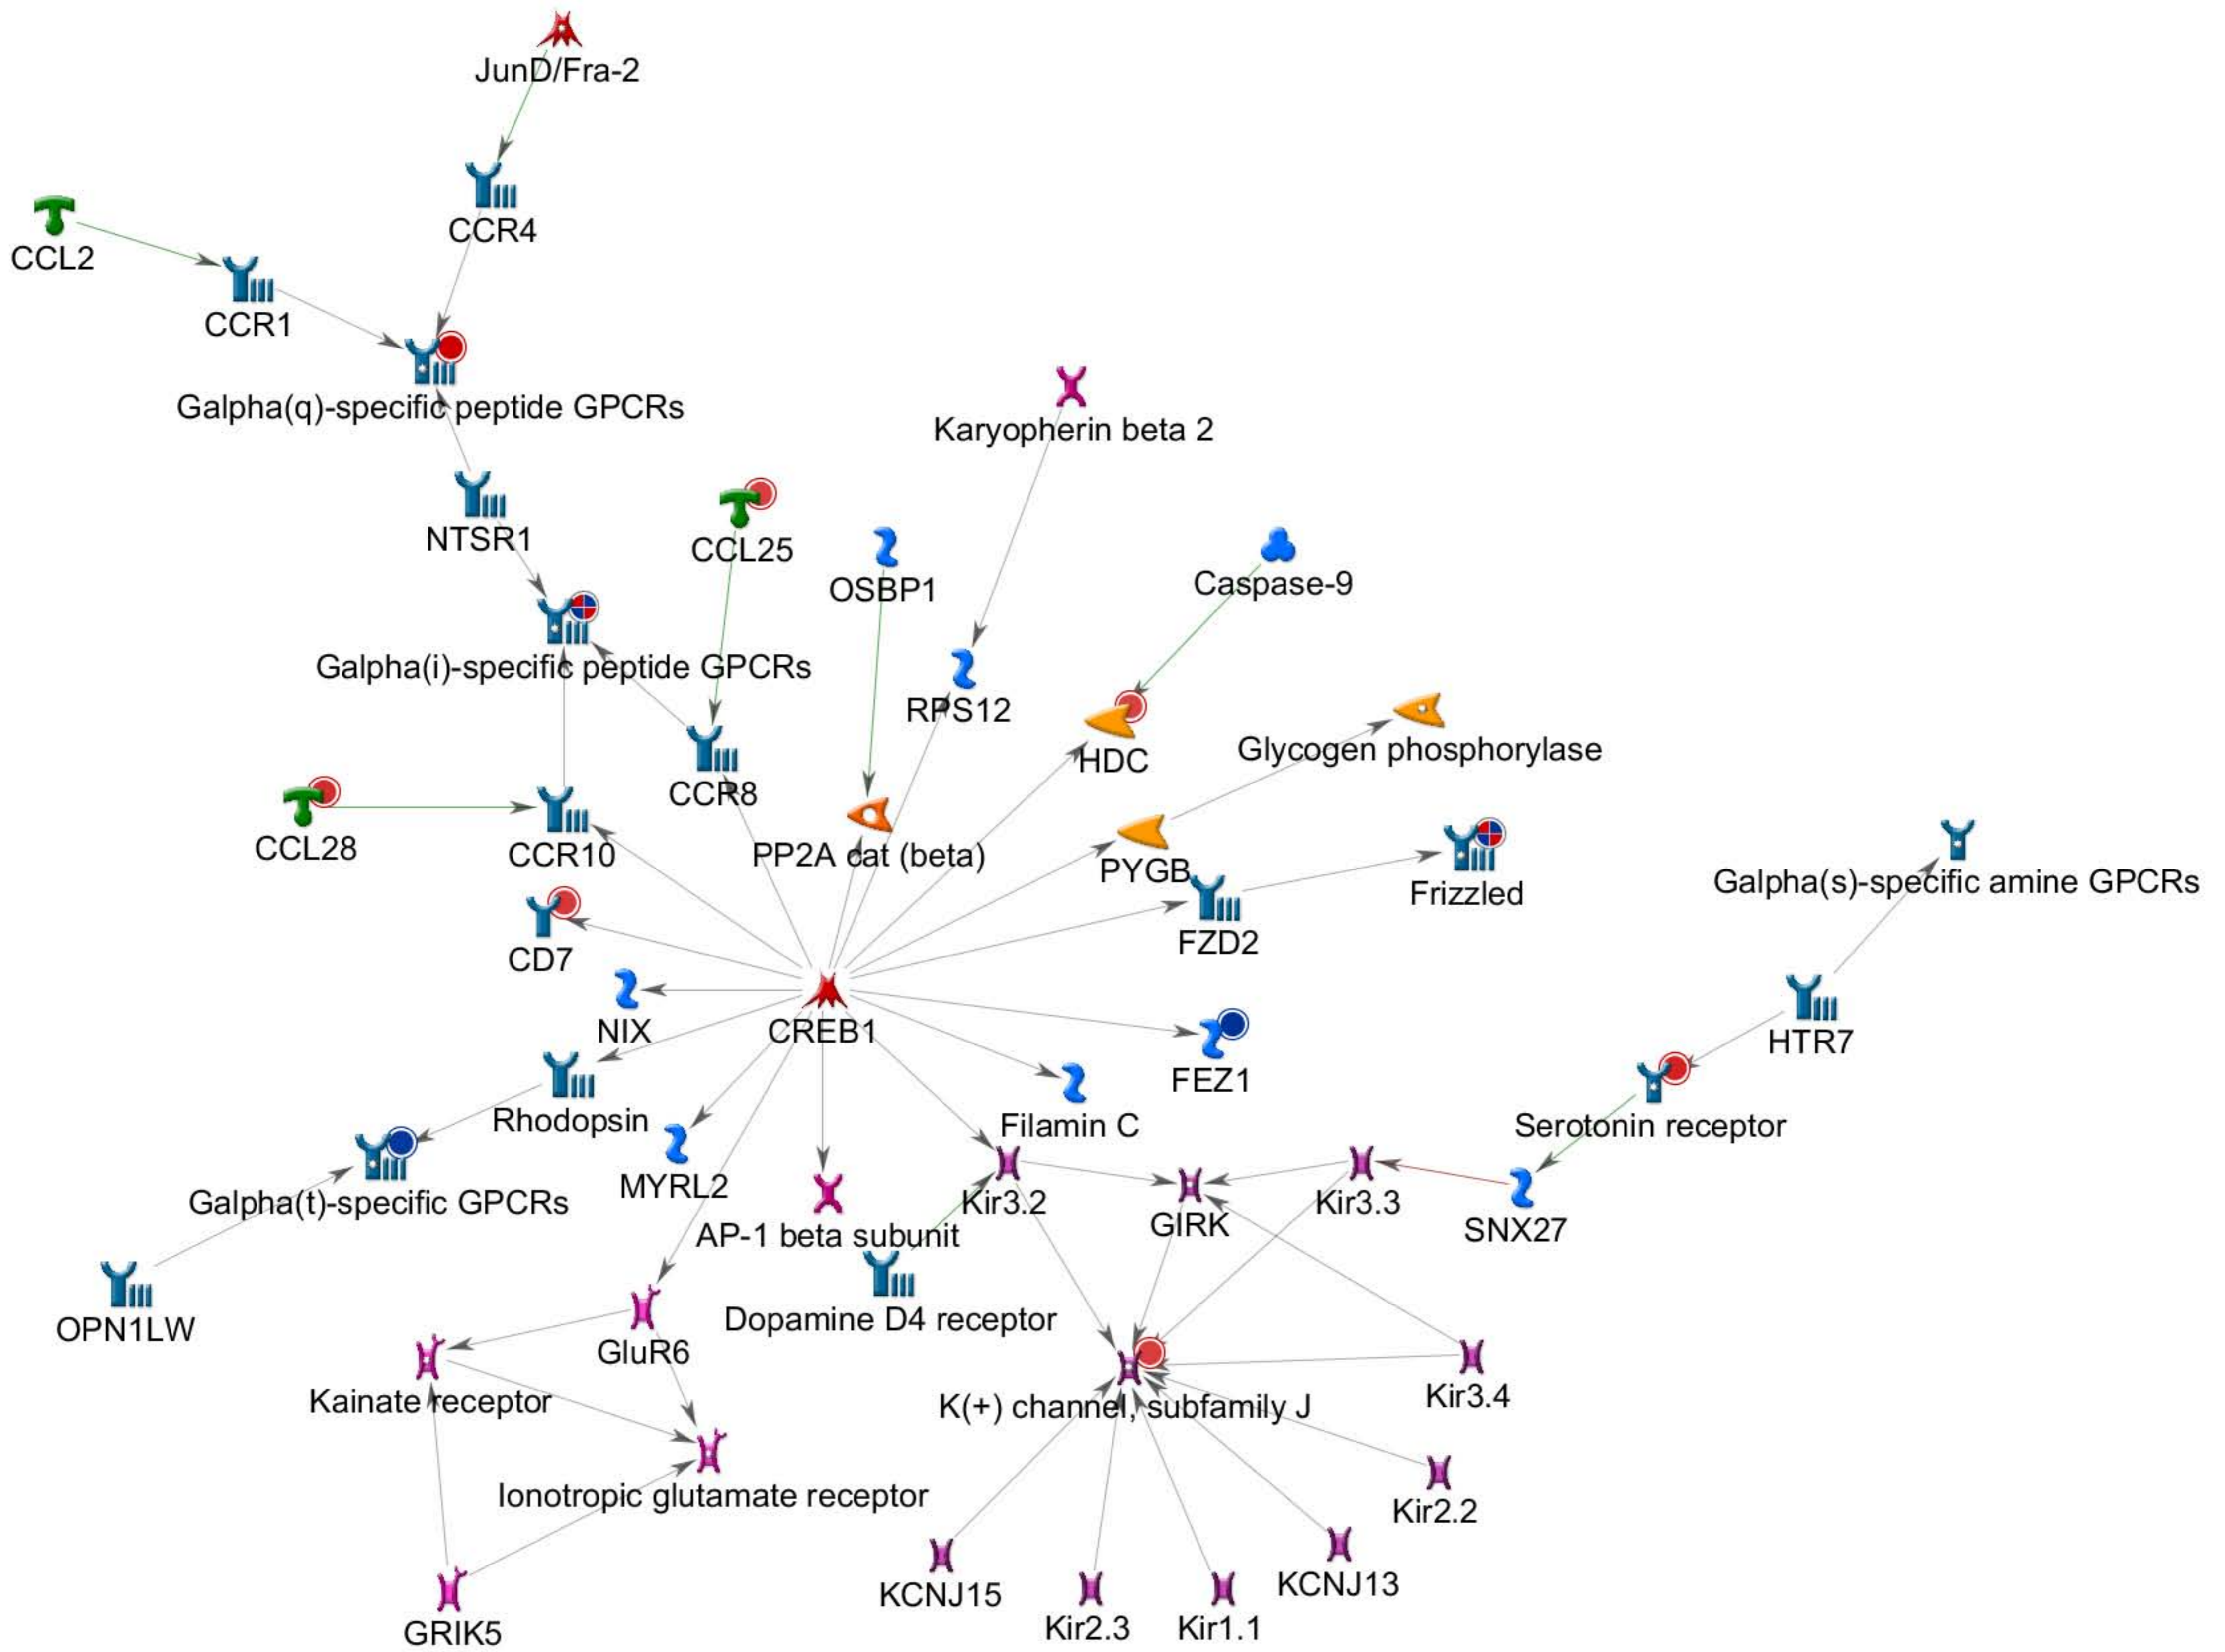



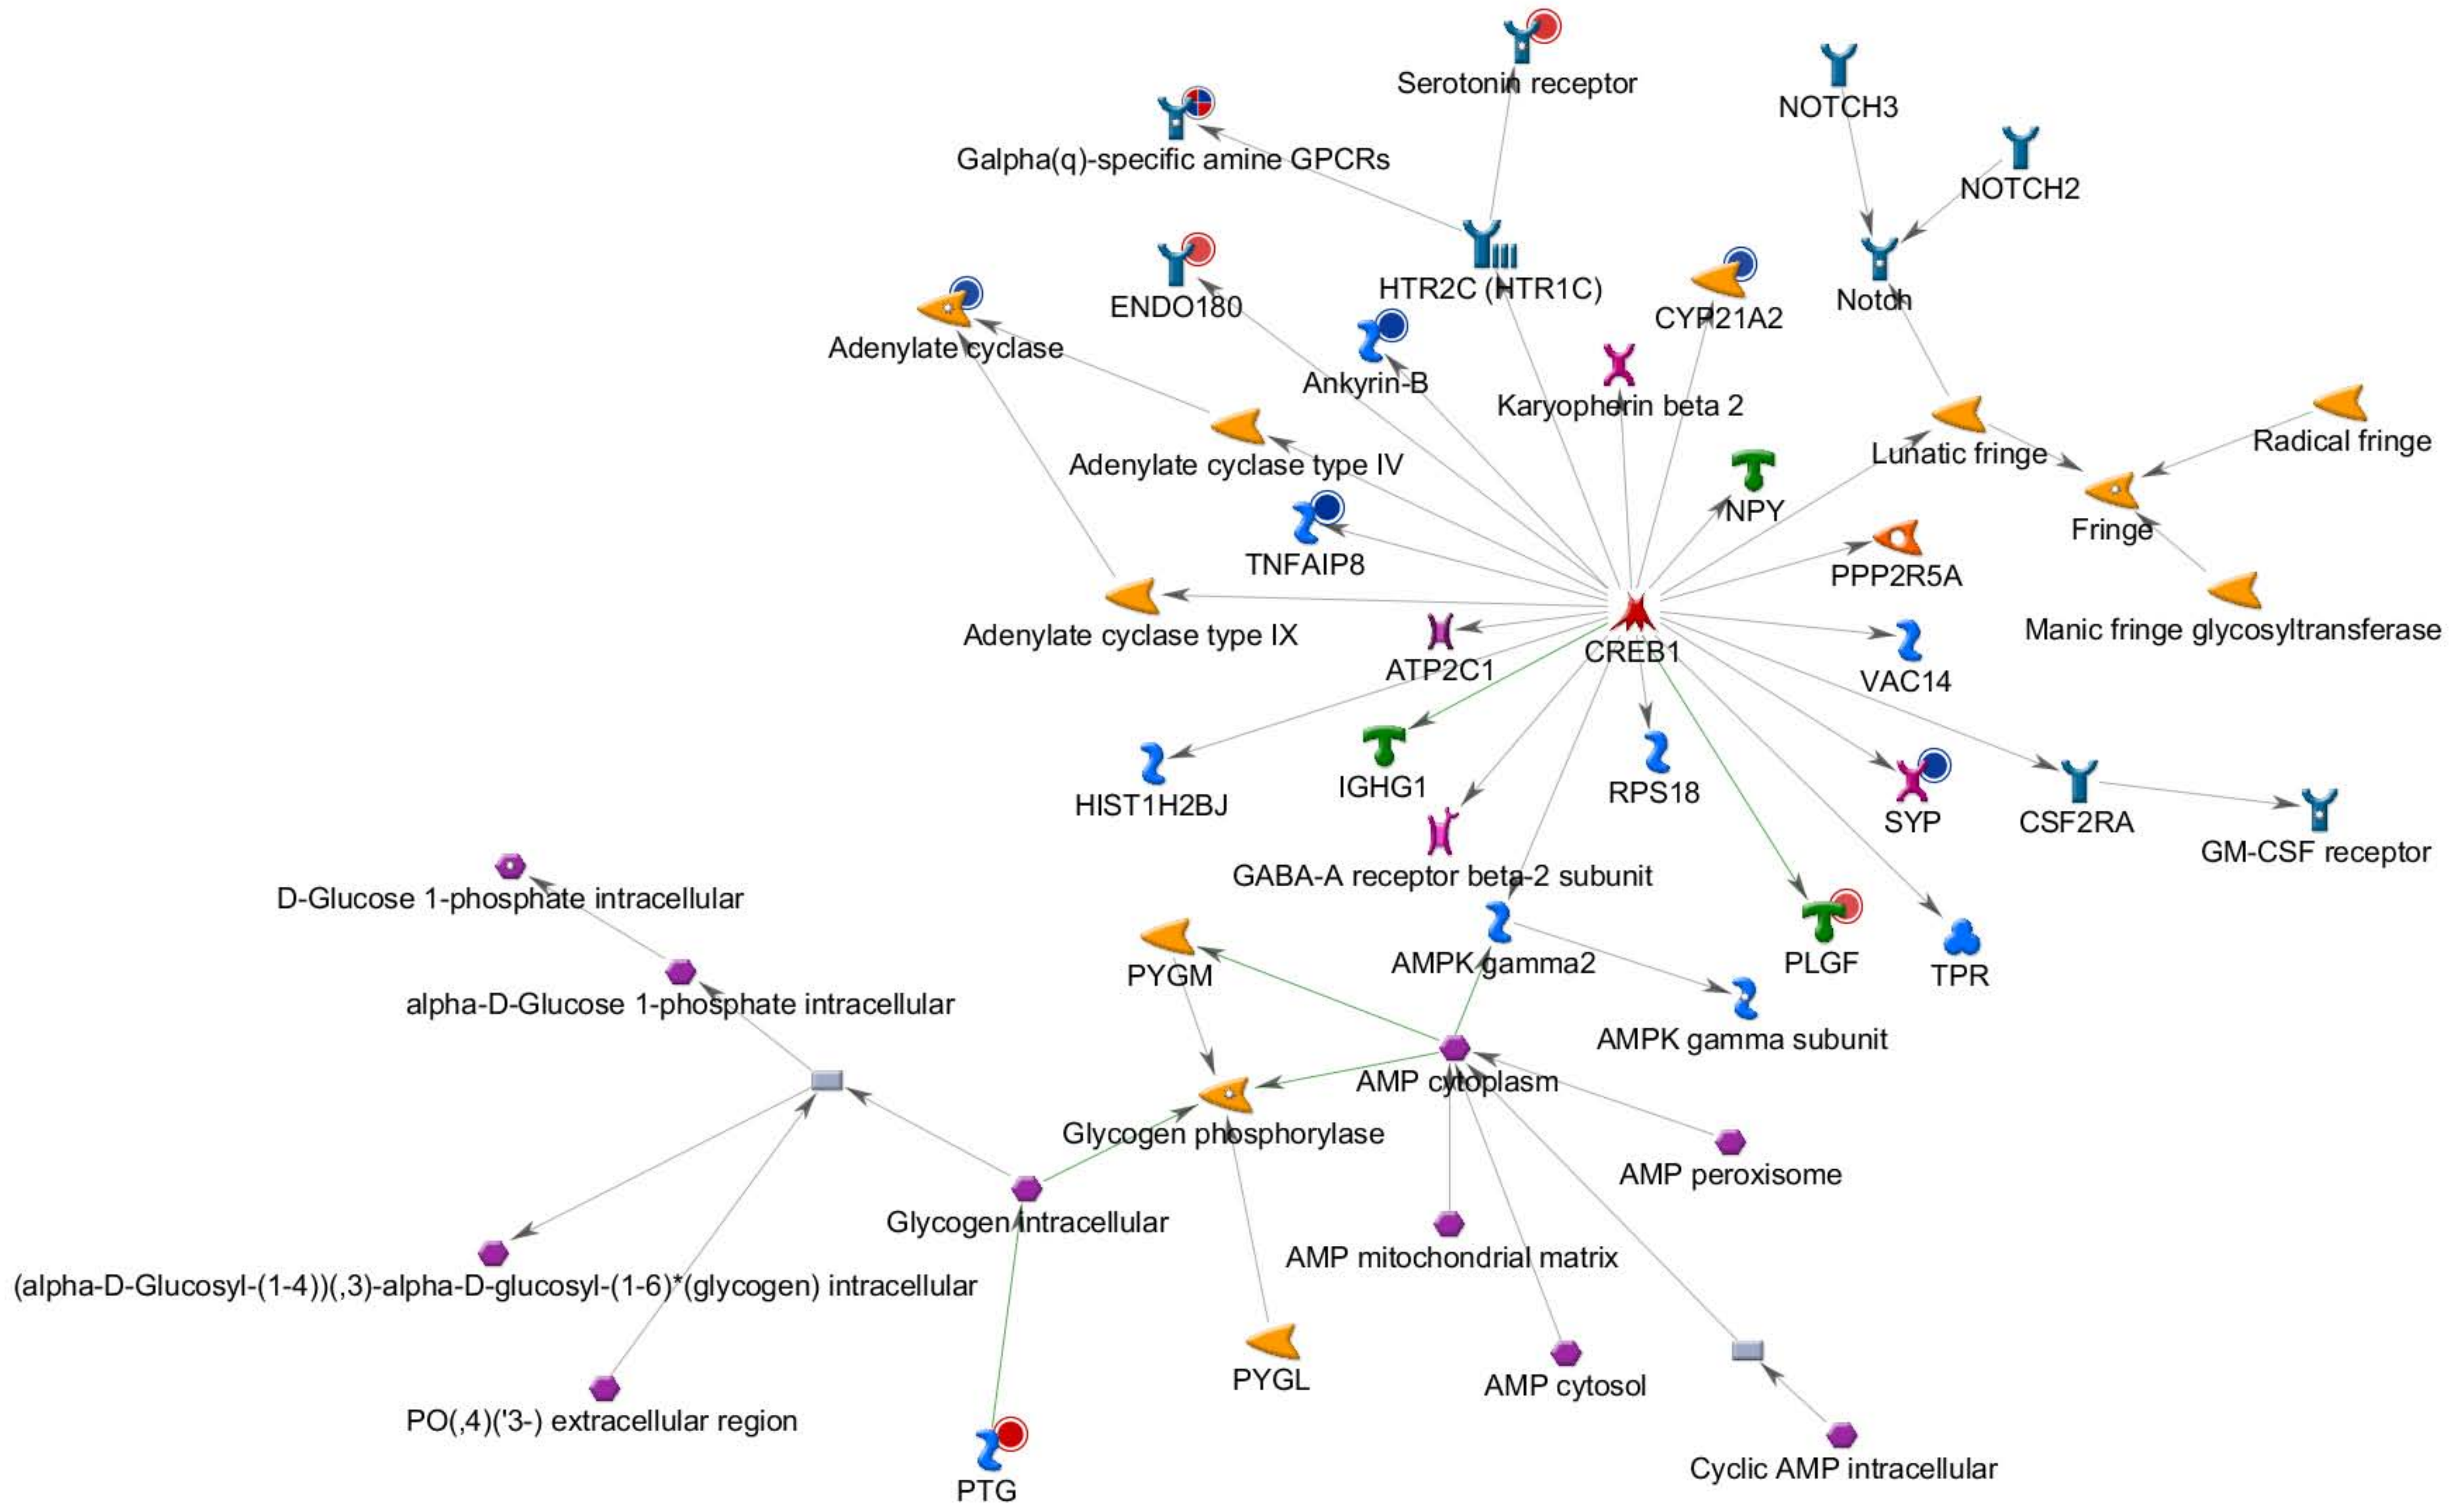



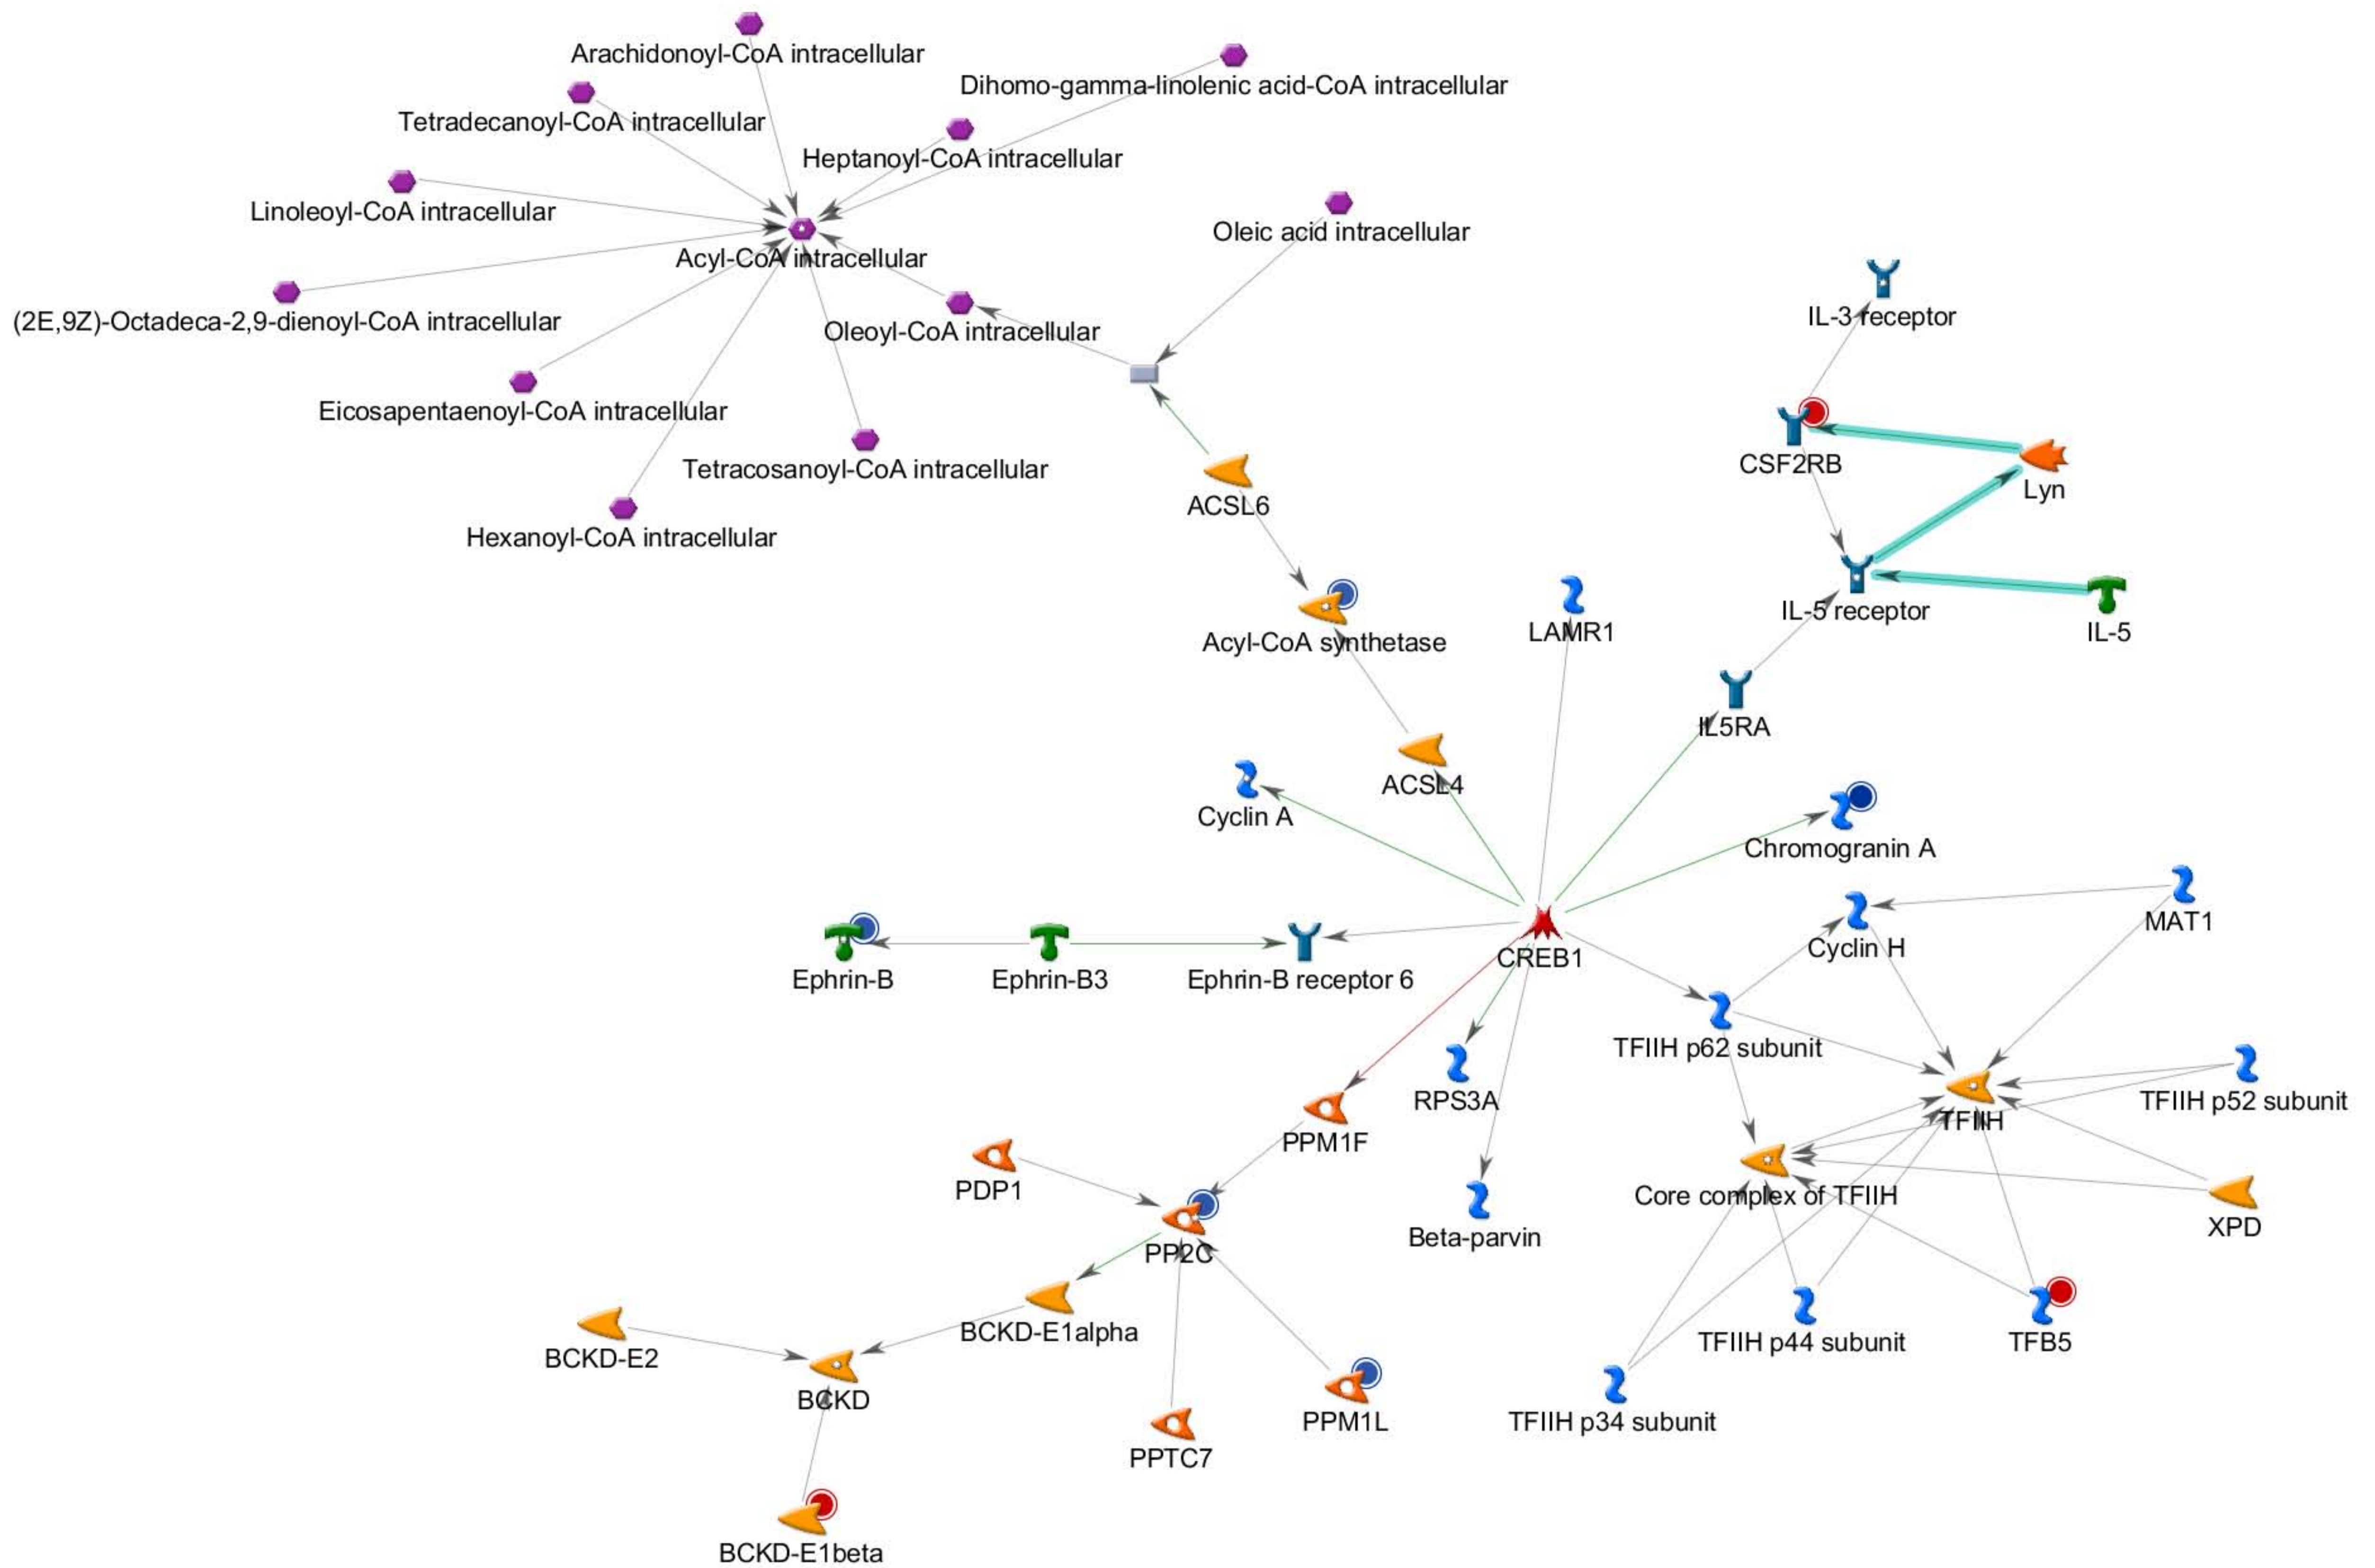



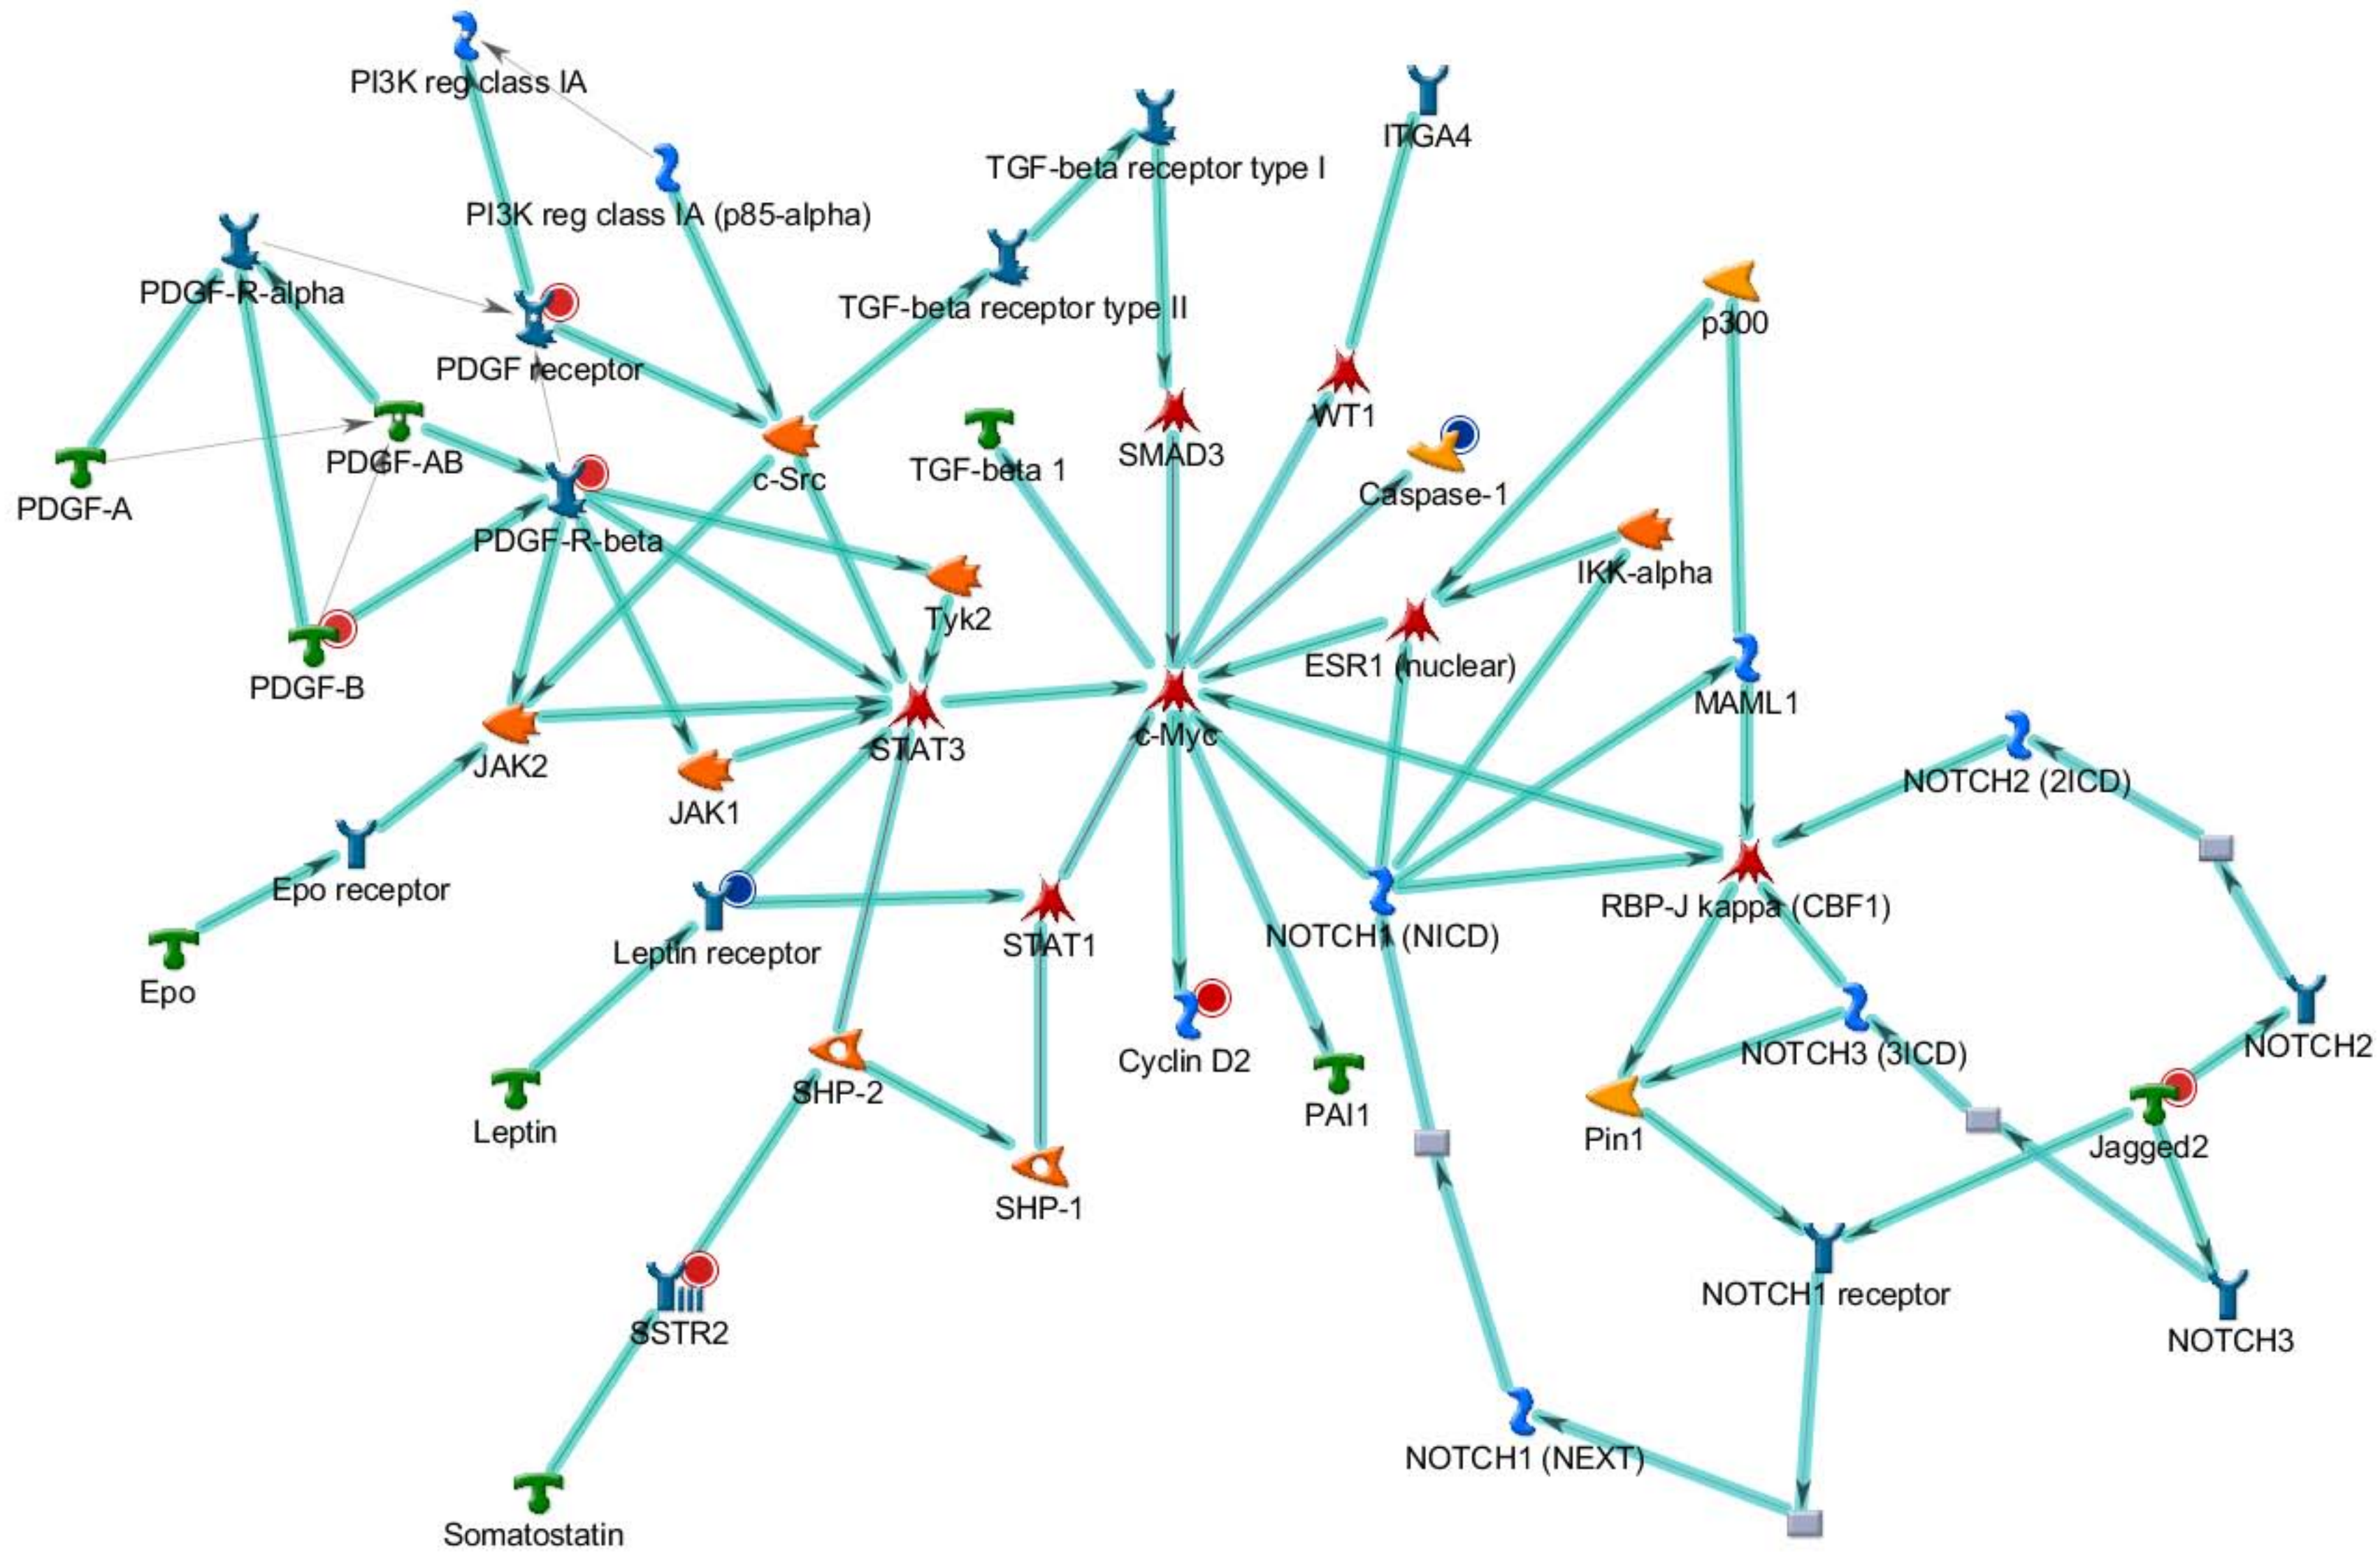



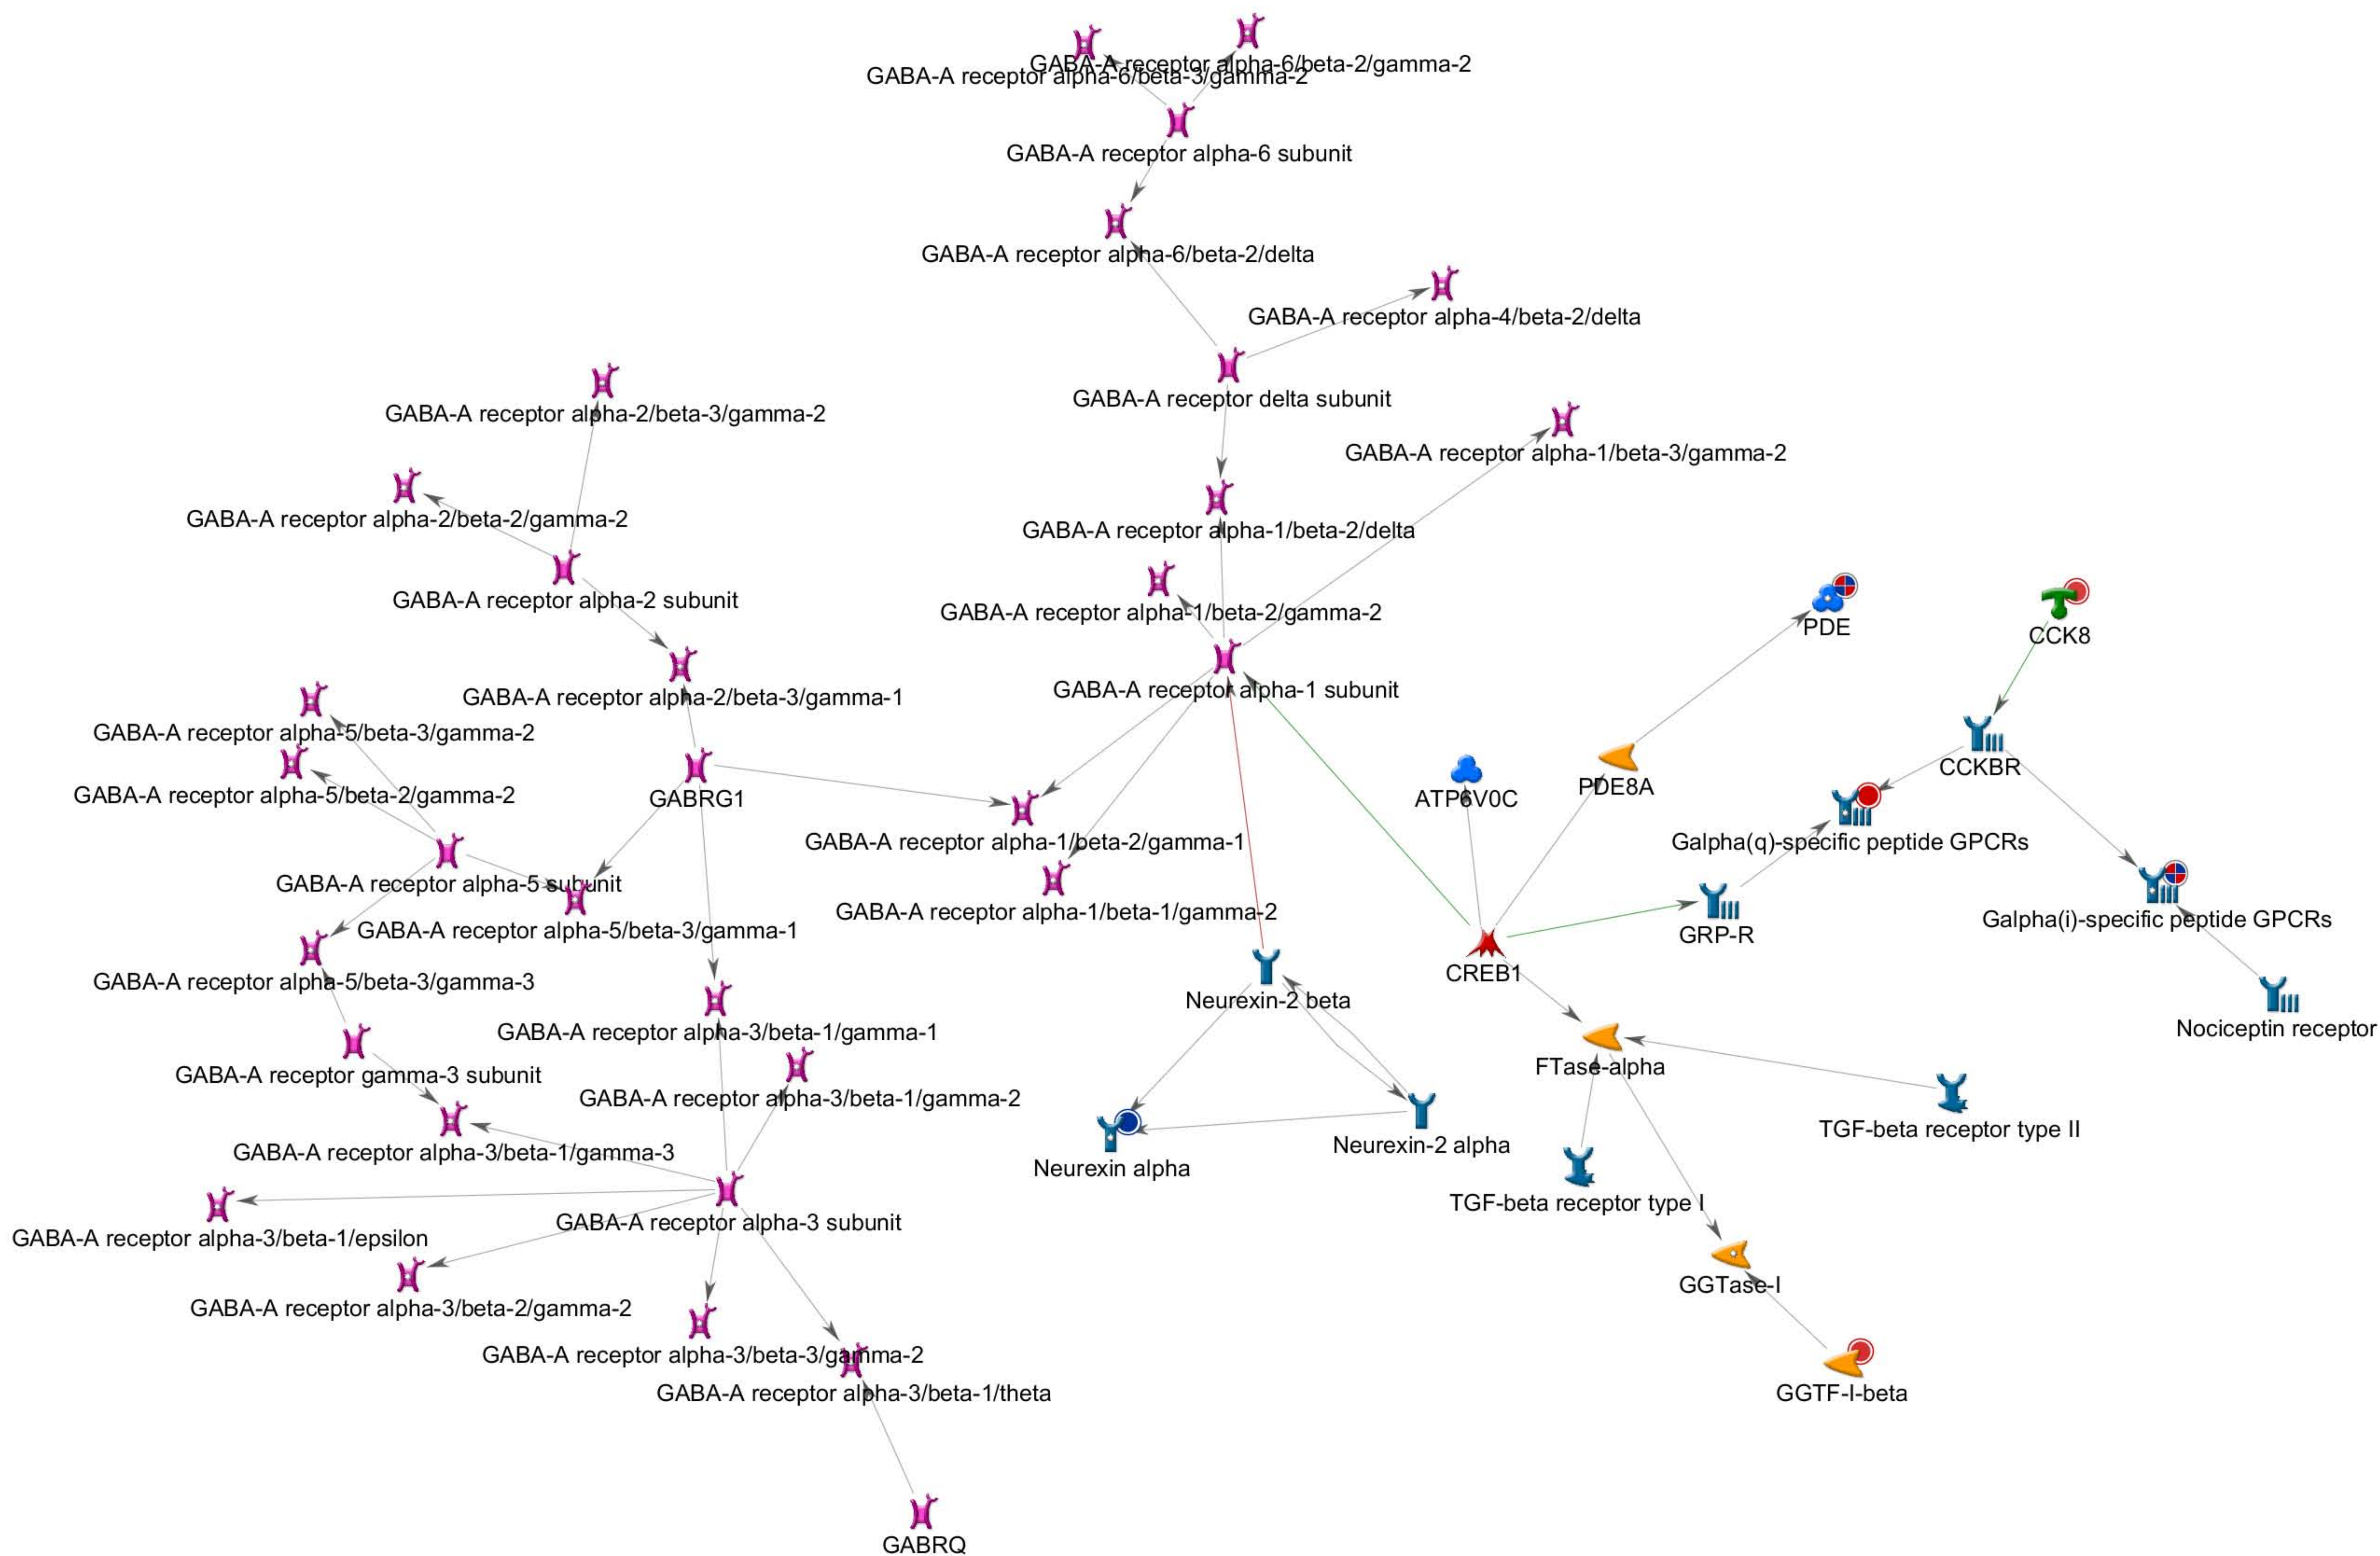

Supplement: mmc3.pdf [file mmc3.pdf]
