# Supplementary material for: Klf5 Deletion Promotes Pten Deletion–Initiated Luminal-Type Mouse Prostate Tumors through Multiple Oncogenic Signaling Pathways
Source: PubMed Central journal article supplement — Neoplasia. 2014 Nov 20;16(11):883–99. doi: 10.1016/j.neo.2014.09.006 (PMC4240924; doi:10.1016/j.neo.2014.09.006), 2014-11-20

**Table S2.** Differentially expressed genes between *Klf5* -wildtype and -null mouse dorsal prostates in the *Pten*-null background, as identified by microarray analysis. Fold-change was the mean value of 4 pairs of samples.

| <b>Gene symbol</b> | <b>RefSeq</b>      | <b>Fold change</b> | <b>p -Value</b> |
|--------------------|--------------------|--------------------|-----------------|
| Spink14            | NM_001039218       | 18.25              | 3.17E-06        |
| Sbp                | NM_011321          | 15.72              | 8.32E-03        |
| Smr2               | NM_001252679       | 14.13              | 6.97E-04        |
| Mug1               | NM_008645          | 11.92              | 2.11E-05        |
| Crabp1             | NM_013496          | 11.90              | 5.95E-06        |
| Abpb               | NM_001100464       | 11.64              | 8.82E-04        |
| Mug-ps1            | NR_027619          | 11.23              | 2.76E-05        |
| Psg27              | NM_001037168       | 10.88              | 1.02E-05        |
| Fam55b             | NM_030069          | 9.24               | 2.86E-04        |
| Mug-ps1            | NR_027619          | 8.35               | 3.85E-05        |
| Lcn13              | NM_153558          | 7.61               | 2.53E-02        |
| 2610528A11Rik      | NM_001206684       | 6.91               | 4.76E-07        |
| Wfdc3              | NM_027961          | 5.82               | 3.87E-05        |
| Abo                | NM_030718          | 5.36               | 7.93E-04        |
| Cbs                | NM_144855          | 5.21               | 9.39E-05        |
| Trpv6              | NM_022413          | 5.07               | 1.52E-04        |
| Ttr                | NM_013697          | 5.05               | 1.56E-03        |
| Mmp12              | NM_008605          | 4.96               | 2.91E-05        |
| Abpa               | NM_009596          | 4.92               | 8.07E-03        |
| Gc                 | NM_008096          | 4.88               | 3.46E-02        |
| Spink5             | NM_001081180       | 4.58               | 2.17E-06        |
| Rgs4               | NM_009062          | 4.50               | 1.96E-03        |
| Mug2               | NM_008646          | 4.49               | 3.91E-06        |
| Duoxa1             | ENSMUST00000110537 | 4.35               | 9.90E-03        |
| Spp1               | NM_001204233       | 4.22               | 8.15E-06        |
| A2m                | ENSMUST00000032203 | 4.15               | 4.09E-03        |
| Slc9a2             | NM_001033289       | 4.15               | 5.39E-06        |
| Krtap3-3           | NM_025524          | 4.14               | 2.02E-03        |
| Ugt2b35            | NM_172881          | 4.13               | 8.65E-03        |
| Cpn1               | NM_030703          | 4.08               | 8.85E-03        |
| Eci3               | NM_026947          | 4.08               | 2.42E-03        |
| Ppp1r3c            | ENSMUST00000087321 | 4.07               | 2.12E-04        |
| Adh6a              | NM_026945          | 3.98               | 8.57E-03        |
| Pak6               | ENSMUST00000099557 | 3.89               | 1.00E-03        |
| Erbp4              | NM_010154          | 3.88               | 6.07E-04        |
| Tac1               | NM_009311          | 3.87               | 7.79E-03        |
| BC100530           | ENSMUST00000096089 | 3.85               | 1.12E-03        |
| Serpina1b          | NM_009244          | 3.80               | 1.01E-04        |
| Prr9               | NM_175424          | 3.76               | 2.01E-03        |

|               |                    |      |          |
|---------------|--------------------|------|----------|
| Col10a1       | NM_009925          | 3.75 | 1.10E-02 |
| Lpo           | NM_080420          | 3.72 | 1.32E-04 |
| Fabp5         | NM_010634          | 3.69 | 4.69E-04 |
| Abpg          | NM_178308          | 3.68 | 1.36E-03 |
| Fabp5         | NM_010634          | 3.67 | 6.77E-04 |
| Wfdc8         | NM_001080550       | 3.65 | 9.33E-03 |
| 5430419D17Rik | NM_175166          | 3.56 | 9.71E-06 |
| Clca2         | NM_030601          | 3.46 | 1.73E-03 |
| Ica11         | NM_027407          | 3.46 | 1.06E-02 |
| Sbpl          | NM_001077421       | 3.42 | 1.09E-03 |
| Scnn1b        | NM_011325          | 3.40 | 1.29E-06 |
| Bhlha15       | NM_010800          | 3.38 | 4.39E-03 |
| Onecut2       | NM_194268          | 3.36 | 3.59E-02 |
| Qpct          | NM_027455          | 3.33 | 3.58E-05 |
| Chi311        | NM_007695          | 3.32 | 8.88E-03 |
| Cited1        | NM_007709          | 3.32 | 1.46E-03 |
| Agtr1a        | NM_177322          | 3.31 | 3.59E-02 |
| Atp6v0d2      | NM_175406          | 3.28 | 1.50E-03 |
| Mmp13         | ENSMUST00000015394 | 3.18 | 6.08E-05 |
| Lrrc52        | ENSMUST00000036643 | 3.12 | 8.42E-04 |
| Gcnt4         | NM_001166065       | 3.11 | 6.91E-05 |
| Rasl11b       | NM_026878          | 3.09 | 1.40E-03 |
| Hdac9         | NM_024124          | 3.03 | 1.18E-04 |
| Gpr123        | NM_177469          | 3.03 | 2.03E-06 |
| Slc1a2        | NM_001077514       | 3.01 | 2.01E-04 |
| Stfa1         | NM_001082543       | 3.01 | 1.13E-03 |
| Psg25         | NM_054060          | 3.00 | 2.21E-04 |
| Cdhr1         | NM_130878          | 2.99 | 1.99E-04 |
| Egf           | NM_010113          | 2.97 | 1.10E-03 |
| Aldh1a2       | NM_009022          | 2.93 | 3.07E-03 |
| Tiaf2         | AF075717           | 2.89 | 1.58E-05 |
| Ccl20         | NM_016960          | 2.89 | 3.61E-02 |
| Fam38b        | NM_001039485       | 2.86 | 5.94E-03 |
| Azgp1         | NM_013478          | 2.81 | 2.96E-02 |
| Gm10403       | AK134775           | 2.80 | 4.72E-04 |
| Fam38b        | NM_001039485       | 2.79 | 5.71E-03 |
| Ank           | NM_020332          | 2.78 | 5.49E-06 |
| Spink6        | NM_001013797       | 2.75 | 8.23E-04 |
| Plod2         | NM_001142916       | 2.74 | 6.42E-04 |
| Cml3          | NM_001037842       | 2.74 | 1.21E-03 |
| GpnmB         | NM_053110          | 2.73 | 2.65E-04 |
| Arg1          | NM_007482          | 2.72 | 9.56E-03 |
| Coro6         | ENSMUST00000102493 | 2.71 | 7.66E-05 |

|               |                    |      |          |
|---------------|--------------------|------|----------|
| R3hdml        | NM_001099331       | 2.70 | 2.32E-03 |
| Myo7b         | NM_032394          | 2.69 | 4.34E-02 |
| Gdpd2         | NM_023608          | 2.69 | 5.61E-03 |
| Derl3         | NM_024440          | 2.67 | 1.80E-03 |
| Nrn1          | NM_153529          | 2.65 | 1.80E-03 |
| Nav3          | NM_001081035       | 2.64 | 1.91E-04 |
| Papss2        | NM_011864          | 2.64 | 3.05E-03 |
| Fam38b        | NM_001039485       | 2.62 | 7.52E-03 |
| Ccnd2         | NM_009829          | 2.62 | 4.10E-04 |
| Fam55d        | ENSMUST00000093853 | 2.61 | 2.57E-07 |
| D7Ert443e     | NM_001199941       | 2.61 | 2.96E-05 |
| Angptl2       | NM_011923          | 2.61 | 3.37E-03 |
| Tex24         | NM_001013609       | 2.60 | 2.49E-05 |
| 9530002B09Rik | NM_023865          | 2.60 | 1.18E-04 |
| Padi2         | NM_008812          | 2.57 | 1.73E-03 |
| Nkx3-1        | NM_010921          | 2.57 | 3.20E-02 |
| Gm11128       | NM_001201389       | 2.57 | 1.36E-03 |
| Slc26a4       | NM_011867          | 2.56 | 3.95E-02 |
| Cyp7b1        | NM_007825          | 2.56 | 9.16E-03 |
| Klf8          | NM_173780          | 2.54 | 1.68E-04 |
| Masp2         | NM_001003893       | 2.53 | 6.25E-03 |
| Chrm3         | NM_033269          | 2.53 | 4.91E-04 |
| Tmem108       | NM_178638          | 2.52 | 2.80E-02 |
| Asrgl1        | NM_025610          | 2.50 | 1.96E-04 |
| Spon1         | NM_145584          | 2.49 | 4.71E-03 |
| S1pr3         | NM_010101          | 2.49 | 7.36E-03 |
| Sema3a        | ENSMUST00000030714 | 2.48 | 7.83E-04 |
| Pycr1         | NM_144795          | 2.47 | 7.25E-05 |
| Rgs5          | ENSMUST00000027997 | 2.46 | 1.99E-03 |
| Prlr          | NM_011169          | 2.45 | 3.26E-03 |
| Arg2          | NM_009705          | 2.44 | 2.75E-03 |
| Phlda2        | NM_009434          | 2.44 | 2.07E-05 |
| Aass          | NM_013930          | 2.43 | 3.01E-03 |
| Slc22a1       | NM_009202          | 2.42 | 6.19E-03 |
| Psg21         | NM_027403          | 2.41 | 3.30E-05 |
| Ankfn1        | NM_001080933       | 2.40 | 1.33E-02 |
| Zfp697        | NM_172863          | 2.40 | 9.96E-05 |
| Htr2b         | NM_008311          | 2.40 | 8.90E-04 |
| Clca1         | ENSMUST00000059091 | 2.40 | 2.95E-03 |
| Mia1          | NM_019394          | 2.38 | 2.20E-04 |
| Prlr          | NM_011169          | 2.37 | 1.96E-03 |
| Rimklb        | NM_027664          | 2.37 | 1.92E-02 |
| Srgap2        | AY512953           | 2.35 | 2.44E-03 |

|               |                    |      |          |
|---------------|--------------------|------|----------|
| Ppbp          | NM_023785          | 2.34 | 7.67E-03 |
| Ceacam13      | NM_027210          | 2.34 | 1.45E-03 |
| Serpina1e     | NM_009247          | 2.34 | 5.20E-05 |
| Tm4sf4        | NM_145539          | 2.33 | 3.83E-02 |
| Aldh1a1       | NM_013467          | 2.32 | 9.75E-04 |
| Prss53        | NM_001081268       | 2.31 | 1.04E-03 |
| Adora2b       | NM_007413          | 2.30 | 7.04E-04 |
| Bmpr1b        | NM_007560          | 2.30 | 4.54E-03 |
| Ublcp1        | NM_024475          | 2.27 | 2.45E-02 |
| Cercam        | NM_207298          | 2.26 | 3.93E-05 |
| Fndc5         | NM_027402          | 2.26 | 3.83E-04 |
| P4ha3         | NM_177161          | 2.26 | 2.29E-03 |
| Cml3          | NM_001037842       | 2.26 | 2.67E-03 |
| 4833422C13Rik | NR_028314          | 2.26 | 1.86E-03 |
| Odz4          | NM_011858          | 2.25 | 1.72E-03 |
| Cntfr         | NM_016673          | 2.24 | 7.48E-03 |
| Trf           | NM_133977          | 2.23 | 4.82E-03 |
| Col15a1       | NM_009928          | 2.19 | 1.17E-02 |
| Steap1        | NM_027399          | 2.19 | 3.26E-03 |
| 3110007F17Rik | BC027572           | 2.19 | 3.55E-02 |
| Ccl28         | NM_020279          | 2.18 | 4.18E-02 |
| Amotl1        | NM_001081395       | 2.18 | 2.04E-04 |
| Stc2          | NM_011491          | 2.17 | 9.92E-03 |
| Rgs5          | ENSMUST00000027997 | 2.17 | 3.47E-03 |
| Cpne5         | NM_153166          | 2.17 | 1.67E-02 |
| Ednrb         | NM_007904          | 2.15 | 1.97E-04 |
| Acnat1        | NM_001164565       | 2.15 | 3.71E-03 |
| Fah           | NM_010176          | 2.15 | 3.90E-05 |
| Dgkh          | NM_001081336       | 2.15 | 7.11E-07 |
| Clec4n        | NM_020001          | 2.14 | 4.05E-03 |
| Ms4a14        | ENSMUST00000067600 | 2.14 | 5.07E-03 |
| Clec4e        | NM_019948          | 2.14 | 2.43E-03 |
| Tbc1d24       | NM_173186          | 2.13 | 1.74E-03 |
| Doc2b         | NM_007873          | 2.13 | 1.06E-03 |
| Lhfp          | NM_175386          | 2.13 | 9.03E-04 |
| Kng2          | NM_201375          | 2.13 | 1.63E-03 |
| Raver2        | NM_183024          | 2.13 | 1.31E-03 |
| LOC100504608  | NM_001205036       | 2.12 | 6.86E-05 |
| Msr1          | NM_031195          | 2.12 | 3.32E-04 |
| Pla1a         | NM_134102          | 2.11 | 2.34E-02 |
| Rxrg          | NM_009107          | 2.11 | 4.93E-03 |
| Sstr2         | NM_009217          | 2.10 | 7.62E-04 |
| Slc6a2        | NM_009209          | 2.10 | 8.86E-03 |

|               |                    |      |          |
|---------------|--------------------|------|----------|
| Mug2          | NM_008646          | 2.10 | 1.65E-04 |
| Irg1          | ENSMUST00000022722 | 2.10 | 8.41E-03 |
| Ggt1          | ENSMUST00000134503 | 2.09 | 1.75E-03 |
| AI646023      | NM_198860          | 2.09 | 1.14E-04 |
| Tnc           | NM_011607          | 2.09 | 3.28E-02 |
| Filip11       | NM_001040397       | 2.09 | 9.60E-03 |
| Camk2b        | NM_007595          | 2.09 | 4.37E-02 |
| Slc16a10      | NM_001114332       | 2.08 | 6.35E-06 |
| Slc7a8        | NM_016972          | 2.08 | 2.19E-03 |
| Fbn1          | ENSMUST00000103234 | 2.08 | 1.21E-02 |
| Cyp3a57       | NM_001100180       | 2.08 | 3.54E-02 |
| Cntnap2       | NM_001004357       | 2.08 | 2.65E-02 |
| Mme           | NM_008604          | 2.08 | 2.50E-04 |
| Spatc1        | NM_028852          | 2.08 | 1.61E-02 |
| 1700072H12Rik | AK006938           | 2.08 | 1.54E-03 |
| Ccbe1         | NM_178793          | 2.07 | 2.82E-03 |
| Mtmr7         | NM_001040699       | 2.07 | 4.89E-02 |
| 3110007F17Rik | BC027572           | 2.07 | 3.74E-02 |
| Ddo           | NM_027442          | 2.07 | 2.88E-03 |
| Rgs2          | NM_009061          | 2.06 | 7.78E-05 |
| Fam184a       | NM_001081428       | 2.06 | 1.82E-05 |
| Cd80          | NM_009855          | 2.06 | 1.72E-03 |
| Ctnnal1       | NM_018761          | 2.05 | 1.46E-06 |
| A330021E22Rik | BC062906           | 2.04 | 5.95E-04 |
| Ggt1          | NM_010283          | 2.04 | 2.32E-03 |
| Gzmc          | NM_010371          | 2.04 | 3.52E-03 |
| Gstm6         | NM_008184          | 2.03 | 4.02E-02 |
| Gm5087        | NM_177813          | 2.03 | 3.61E-03 |
| Anxa6         | NM_013472          | 2.03 | 1.09E-04 |
| Psg18         | NM_011963          | 2.03 | 2.96E-03 |
| Syt15         | NM_177704          | 2.02 | 1.88E-03 |
| Tdrd5         | NM_001134741       | 2.02 | 2.32E-03 |
| D730039F16Rik | BC021771           | 2.02 | 2.85E-03 |
| Hey1          | NM_010423          | 2.00 | 1.41E-02 |
| Spinlw1       | NM_029325          | 2.00 | 2.60E-02 |
| Ero11b        | NM_026184          | 2.00 | 3.89E-03 |
| Ak4           | NM_001177602       | 1.99 | 2.58E-03 |
| Dact1         | NM_001190466       | 1.99 | 4.55E-04 |
| Hist1h2be     | NM_001177653       | 1.98 | 1.03E-03 |
| Ccl3          | NM_011337          | 1.98 | 1.26E-03 |
| Ceacam20      | NM_027839          | 1.97 | 4.45E-04 |
| Mir181b-1     | NR_029820          | 1.96 | 9.20E-04 |
| Olr1          | NM_138648          | 1.96 | 1.29E-03 |

|               |                    |      |          |
|---------------|--------------------|------|----------|
| Bok           | NM_016778          | 1.96 | 1.93E-04 |
| Steap4        | ENSMUST00000115421 | 1.95 | 9.47E-03 |
| 3110007F17Rik | BC027572           | 1.95 | 4.07E-02 |
| Kcnn4         | NM_008433          | 1.95 | 3.90E-03 |
| Lrrc32        | NM_001113379       | 1.95 | 2.00E-02 |
| Aldh6a1       | NM_134042          | 1.94 | 2.31E-05 |
| Hc            | NM_010406          | 1.93 | 2.34E-03 |
| Il1a          | NM_010554          | 1.93 | 1.79E-02 |
| Aqp9          | NM_022026          | 1.93 | 5.91E-05 |
| St3gal4       | NM_009178          | 1.93 | 3.69E-04 |
| Shisa2        | NM_145463          | 1.92 | 2.06E-03 |
| Serpina1a     | NM_001252569       | 1.92 | 1.86E-05 |
| Pknox2        | NM_001029838       | 1.92 | 3.52E-03 |
| Ranbp17       | NM_023146          | 1.92 | 6.49E-04 |
| Caln1         | NM_181045          | 1.92 | 3.87E-03 |
| Eif4ebp1      | NM_007918          | 1.91 | 9.76E-05 |
| Gjal          | NM_010288          | 1.91 | 2.74E-02 |
| Cxcl2         | NM_009140          | 1.91 | 3.06E-02 |
| Fam132a       | NM_026125          | 1.90 | 1.15E-03 |
| Clec4d        | NM_010819          | 1.90 | 1.24E-03 |
| Chodl         | NM_139134          | 1.88 | 1.99E-02 |
| Slc25a43      | NM_001085497       | 1.88 | 2.01E-04 |
| Bmp7          | NM_007557          | 1.88 | 3.55E-03 |
| Palmd         | NM_023245          | 1.88 | 6.79E-04 |
| Serpina3n     | NM_009252          | 1.88 | 3.92E-02 |
| Gzmb          | NM_013542          | 1.87 | 6.55E-04 |
| Thbs2         | NM_011581          | 1.87 | 1.83E-02 |
| Gzmd          | NM_010372          | 1.87 | 4.08E-02 |
| Fhl5          | NM_021318          | 1.87 | 8.22E-04 |
| Kdelr3        | NM_134090          | 1.86 | 8.62E-04 |
| Ttc7b         | NM_001033213       | 1.86 | 1.68E-04 |
| Efna3         | NM_010108          | 1.86 | 4.55E-03 |
| Cd7           | NM_009854          | 1.86 | 2.30E-02 |
| Dppa2         | NM_028615          | 1.85 | 9.25E-06 |
| Pla2g7        | NM_013737          | 1.85 | 1.96E-03 |
| Trem1         | NM_021406          | 1.85 | 5.82E-04 |
| Sfrp1         | NM_013834          | 1.85 | 2.47E-02 |
| Crabp2        | NM_007759          | 1.84 | 2.28E-04 |
| Slc16a12      | NM_172838          | 1.84 | 1.65E-04 |
| Selp          | NM_011347          | 1.84 | 2.07E-02 |
| Fcer2a        | NM_013517          | 1.84 | 1.13E-02 |
| Prrg3         | NM_001081135       | 1.83 | 1.60E-02 |
| Abhd3         | NM_134130          | 1.83 | 2.38E-03 |

|               |                    |      |          |
|---------------|--------------------|------|----------|
| Lox           | NM_010728          | 1.83 | 1.94E-02 |
| Scin          | NM_001146196       | 1.83 | 1.85E-02 |
| Gp49a         | ENSMUST00000102894 | 1.83 | 1.86E-03 |
| Flrt3         | NM_001172160       | 1.83 | 3.15E-04 |
| Vcam1         | NM_011693          | 1.82 | 1.94E-02 |
| Cad           | NM_023525          | 1.82 | 6.17E-04 |
| Cd93          | NM_010740          | 1.82 | 1.85E-02 |
| Pdgfd         | NM_027924          | 1.82 | 1.03E-04 |
| Adamts4       | ENSMUST00000006570 | 1.81 | 3.38E-04 |
| Hilpda        | NM_023516          | 1.81 | 2.06E-04 |
| Cck           | NM_031161          | 1.81 | 2.46E-03 |
| Pdgfrb        | NM_001146268       | 1.81 | 4.25E-02 |
| Mgst1         | NM_019946          | 1.81 | 5.91E-05 |
| Ceacam12      | NM_026087          | 1.81 | 4.62E-03 |
| Pilra         | NM_153510          | 1.81 | 6.80E-04 |
| 4932411E22Rik | BC140961           | 1.80 | 4.97E-03 |
| Lphn2         | NM_001081298       | 1.80 | 1.83E-03 |
| Ephx3         | NM_001033163       | 1.80 | 2.49E-02 |
| Slc39a6       | NM_139143          | 1.80 | 9.67E-05 |
| Dos           | NR_036582          | 1.80 | 2.30E-05 |
| Cmah          | NM_001111110       | 1.79 | 7.55E-04 |
| Rab31         | NM_133685          | 1.79 | 7.88E-06 |
| Cd80          | ENSMUST00000104896 | 1.79 | 8.14E-03 |
| Soat1         | NM_009230          | 1.79 | 4.52E-04 |
| Mrc2          | NM_008626          | 1.79 | 7.87E-03 |
| Fmo4          | NM_144878          | 1.79 | 1.75E-02 |
| Spred3        | NM_182927          | 1.79 | 3.55E-06 |
| Cdh17         | NM_019753          | 1.79 | 7.34E-03 |
| Hoxb13        | ENSMUST00000062709 | 1.79 | 1.54E-04 |
| Vsnl1         | NM_012038          | 1.78 | 4.34E-02 |
| Bambi         | NM_026505          | 1.78 | 2.61E-05 |
| Mmp8          | NM_008611          | 1.78 | 3.44E-03 |
| Il1f9         | NM_153511          | 1.77 | 2.35E-02 |
| Prom2         | ENSMUST00000028855 | 1.77 | 2.93E-03 |
| Rev3l         | NM_011264          | 1.77 | 2.19E-04 |
| Tnnt2         | NM_001130175       | 1.77 | 5.78E-04 |
| Scarna17      | NR_028560          | 1.77 | 6.99E-06 |
| Scarna17      | NR_028560          | 1.77 | 6.99E-06 |
| Tgm1          | NM_001161715       | 1.77 | 2.20E-03 |
| Colla1        | NM_007742          | 1.77 | 2.71E-02 |
| Gmpr          | NM_025508          | 1.76 | 3.06E-03 |
| Dclk3         | NM_172928          | 1.76 | 3.63E-03 |
| Col5a2        | NM_007737          | 1.76 | 2.27E-02 |

|          |                    |      |          |
|----------|--------------------|------|----------|
| Adamts12 | NM_175501          | 1.76 | 9.74E-03 |
| Tnfrsf26 | ENSMUST00000055723 | 1.75 | 1.07E-03 |
| Lipg     | NM_010720          | 1.75 | 2.17E-02 |
| Cdh5     | NM_009868          | 1.75 | 8.41E-03 |
| Jag2     | NM_010588          | 1.75 | 7.33E-03 |
| Timp1    | NM_001044384       | 1.75 | 3.66E-02 |
| Pqlc3    | NM_172574          | 1.74 | 5.41E-03 |
| Clec7a   | NM_020008          | 1.74 | 4.64E-03 |
| Tcf7l1   | NM_001079822       | 1.74 | 2.58E-04 |
| Tnfrsf23 | NM_024290          | 1.74 | 6.25E-03 |
| Zfp389   | NR_026798          | 1.74 | 3.51E-03 |
| Atp8b5   | NM_177195          | 1.74 | 1.43E-04 |
| Treh     | NM_021481          | 1.74 | 4.04E-02 |
| Grb14    | NM_016719          | 1.74 | 3.40E-04 |
| Plcx2    | NM_001134480       | 1.74 | 7.90E-03 |
| Kcnj2    | NM_008425          | 1.74 | 2.52E-04 |
| Flt1     | NM_010228          | 1.74 | 3.25E-03 |
| Gm10002  | AK040372           | 1.73 | 3.11E-02 |
| Pde3a    | NM_018779          | 1.73 | 1.79E-03 |
| Glis3    | ENSMUST00000162022 | 1.73 | 8.94E-03 |
| Col1a2   | NM_007743          | 1.73 | 1.55E-02 |
| Aqp1     | NM_007472          | 1.73 | 6.94E-03 |
| Cd300lf  | NM_001169153       | 1.73 | 2.74E-03 |
| Trem3    | NM_021407          | 1.73 | 1.35E-03 |
| Pdgfrl   | NM_026840          | 1.72 | 4.47E-02 |
| Slc5a8   | NM_145423          | 1.72 | 3.80E-02 |
| Slc16a4  | NM_146136          | 1.72 | 4.03E-03 |
| Gm10400  | NR_033555          | 1.72 | 4.83E-03 |
| Cxcr2    | NM_009909          | 1.72 | 4.40E-02 |
| Gstm7    | NM_026672          | 1.72 | 2.85E-02 |
| Il1b     | NM_008361          | 1.71 | 4.86E-03 |
| Lrrc3b   | NM_146052          | 1.70 | 3.11E-03 |
| Gpx3     | NM_008161          | 1.70 | 4.05E-03 |
| Paqr3    | NM_198422          | 1.70 | 1.21E-03 |
| Pm20d1   | NM_178079          | 1.70 | 1.81E-03 |
| Adm      | NM_009627          | 1.70 | 6.43E-03 |
| Slc19a2  | NM_054087          | 1.70 | 3.35E-04 |
| Parp8    | NM_001081009       | 1.69 | 1.19E-05 |
| Pfkfb3   | NM_001177753       | 1.69 | 1.38E-03 |
| Rcn1     | NM_009037          | 1.69 | 7.43E-04 |
| Ctsz     | NM_022325          | 1.69 | 1.26E-03 |
| Col3a1   | NM_009930          | 1.69 | 2.00E-02 |
| Rmnd5a   | NM_024288          | 1.69 | 1.24E-04 |



|               |                    |      |          |
|---------------|--------------------|------|----------|
| Ttc12         | NM_172770          | 1.69 | 1.13E-04 |
| Arhgap24      | NM_029270          | 1.68 | 4.73E-04 |
| Rgs1          | NM_015811          | 1.68 | 1.06E-03 |
| Apln          | NM_013912          | 1.68 | 6.19E-04 |
| Gstt1         | NM_008185          | 1.68 | 6.10E-04 |
| Slc25a23      | NM_025877          | 1.68 | 8.56E-03 |
| Ttyh2         | NM_053273          | 1.68 | 1.56E-02 |
| Wbscr17       | NM_145218          | 1.67 | 4.87E-03 |
| Col4a2        | ENSMUST00000033899 | 1.67 | 2.01E-02 |
| Osbpl1a       | NM_207530          | 1.67 | 7.42E-04 |
| Yif1b         | NM_029887          | 1.67 | 1.35E-04 |
| Efcab5        | NM_176965          | 1.67 | 8.58E-03 |
| Egr2          | NM_010118          | 1.67 | 3.32E-02 |
| Rasgrp3       | NM_207246          | 1.66 | 3.81E-02 |
| Angpt2        | NM_007426          | 1.66 | 1.92E-04 |
| Spry2         | NM_011897          | 1.66 | 2.13E-03 |
| Gga2          | NM_028758          | 1.66 | 1.55E-04 |
| Il34          | NM_029646          | 1.66 | 5.97E-04 |
| Nudt10        | NM_001031664       | 1.66 | 9.88E-03 |
| Tril          | NM_025817          | 1.66 | 2.49E-02 |
| Abpz          | NM_177446          | 1.66 | 1.64E-03 |
| Gm10267       | ENSMUST00000091916 | 1.66 | 1.73E-03 |
| Gm14005       | NR_028590          | 1.66 | 4.76E-02 |
| Loxl1         | NM_010729          | 1.65 | 3.10E-02 |
| Bbs4          | NM_175325          | 1.65 | 2.41E-04 |
| Lyz2          | NM_017372          | 1.65 | 1.60E-02 |
| Ccl25         | NM_009138          | 1.65 | 2.48E-03 |
| Auts2         | NM_177047          | 1.65 | 1.43E-03 |
| Chst11        | NM_021439          | 1.65 | 1.44E-02 |
| Pesk6         | NM_011048          | 1.65 | 4.01E-02 |
| Lphn2         | NM_001081298       | 1.65 | 6.34E-04 |
| Cxcl1         | NM_008176          | 1.65 | 1.60E-02 |
| Trib3         | NM_175093          | 1.65 | 5.98E-04 |
| Mir181b-2     | NR_029904          | 1.65 | 4.85E-02 |
| 1700011H14Rik | NM_025956          | 1.65 | 5.70E-03 |
| Lphn2         | NM_001081298       | 1.65 | 3.61E-03 |
| Itgax         | NM_021334          | 1.65 | 3.47E-02 |
| Farp2         | NM_145519          | 1.64 | 5.14E-04 |
| Prss2         | NM_009430          | 1.64 | 8.88E-04 |
| Ap1s2         | NM_026887          | 1.64 | 7.59E-03 |
| Gpr153        | NM_178406          | 1.64 | 7.32E-03 |
| Cd300ld       | NM_145437          | 1.64 | 1.13E-03 |
| Mdk           | NM_010784          | 1.64 | 1.25E-02 |

|           |                    |      |          |
|-----------|--------------------|------|----------|
| Mt1       | NM_013602          | 1.64 | 2.61E-05 |
| Apobec1   | NM_031159          | 1.64 | 1.73E-03 |
| Slc2a12   | NM_178934          | 1.63 | 4.17E-03 |
| Mat2a     | NM_145569          | 1.63 | 3.34E-05 |
| Aldh7a1   | NM_001127338       | 1.63 | 1.59E-04 |
| Slc39a14  | NM_001135151       | 1.63 | 5.72E-04 |
| Lphn2     | NM_001081298       | 1.63 | 3.14E-03 |
| Ctns      | NM_031251          | 1.63 | 2.36E-03 |
| Plekhh2   | NM_177606          | 1.63 | 2.55E-04 |
| Slco2a1   | NM_033314          | 1.63 | 7.00E-04 |
| Cp        | NM_001042611       | 1.63 | 2.02E-03 |
| Sirpb1b   | NM_001173460       | 1.63 | 3.79E-02 |
| Ctnnd2    | NM_008729          | 1.63 | 2.27E-02 |
| Igsf6     | NM_030691          | 1.63 | 3.25E-03 |
| Hdc       | NM_008230          | 1.62 | 2.18E-02 |
| Prkg2     | ENSMUST00000161490 | 1.62 | 3.96E-02 |
| Hmcn1     | NM_001024720       | 1.62 | 9.37E-04 |
| Tm4sf19   | NM_001160402       | 1.62 | 9.31E-03 |
| Ctsk      | NM_007802          | 1.62 | 4.16E-02 |
| Mfap3l    | NM_027756          | 1.62 | 2.31E-03 |
| Glis3     | NM_175459          | 1.62 | 2.02E-02 |
| Gtf2h5    | NM_181392          | 1.62 | 1.13E-03 |
| Pgf       | NM_008827          | 1.62 | 1.73E-02 |
| Tnfrsf12a | NM_013749          | 1.62 | 1.37E-02 |
| Fetub     | NM_021564          | 1.62 | 1.70E-02 |
| Greb1l    | NM_001083628       | 1.62 | 2.81E-02 |
| Tuba4a    | NM_009447          | 1.62 | 1.95E-04 |
| Trpm3     | ENSMUST00000112704 | 1.62 | 2.33E-04 |
| Hmcn1     | NM_001024720       | 1.62 | 8.84E-03 |
| Tspan7    | NM_019634          | 1.62 | 2.12E-02 |
| Fbn2      | NM_010181          | 1.62 | 4.11E-05 |
| Nek5      | NM_177898          | 1.61 | 2.75E-03 |
| Wdr52     | NM_001033247       | 1.61 | 1.32E-02 |
| Cd40      | NR_027852          | 1.61 | 2.73E-03 |
| Try10     | NM_001038996       | 1.61 | 7.42E-03 |
| Hmcn1     | ENSMUST00000074783 | 1.61 | 1.81E-02 |
| Chrnbl    | NM_009601          | 1.61 | 1.64E-04 |
| Cdh3      | NM_001037809       | 1.61 | 1.25E-02 |
| Glipr1    | NM_028608          | 1.61 | 2.29E-02 |
| Lrp2bp    | NM_026278          | 1.60 | 4.62E-04 |
| Fam3c     | NM_138587          | 1.60 | 5.99E-04 |
| S100a8    | NM_013650          | 1.60 | 1.79E-02 |
| Clec11a   | NM_009131          | 1.60 | 3.67E-03 |

|          |                    |      |          |
|----------|--------------------|------|----------|
| Dio3     | NM_172119          | 1.60 | 8.30E-03 |
| Best1    | NM_011913          | 1.60 | 2.52E-03 |
| Esam     | NM_027102          | 1.60 | 8.95E-03 |
| Acad8    | NM_025862          | 1.60 | 1.97E-04 |
| Lphn2    | NM_001081298       | 1.60 | 3.61E-04 |
| Clca5    | ENSMUST00000040465 | 1.60 | 7.72E-03 |
| Bckdhb   | ENSMUST00000034801 | 1.60 | 1.05E-04 |
| Fam167a  | NM_177628          | 1.60 | 8.21E-04 |
| Zfp354b  | NM_013744          | 1.60 | 1.59E-03 |
| Crlf1    | NM_018827          | 1.60 | 2.22E-02 |
| Emcn     | ENSMUST00000122064 | 1.59 | 5.61E-03 |
| Loxl3    | NM_013586          | 1.59 | 3.55E-02 |
| Adamts9  | NM_175314          | 1.59 | 5.51E-03 |
| Fv1      | NM_010244          | 1.59 | 6.70E-04 |
| Greb11   | NM_001083628       | 1.59 | 3.46E-02 |
| Gpr116   | NM_001081178       | 1.59 | 8.14E-03 |
| Sema6a   | NM_018744          | 1.59 | 2.61E-02 |
| Mfap5    | NM_015776          | 1.59 | 4.10E-02 |
| Rasgrf1  | NM_011245          | 1.59 | 5.80E-04 |
| Preld2   | NM_029942          | 1.59 | 4.70E-03 |
| Osbpl3   | NM_027881          | 1.59 | 1.37E-03 |
| Nphs2    | NM_130456          | 1.59 | 2.40E-04 |
| Apold1   | NM_001109914       | 1.58 | 3.86E-03 |
| Susd2    | NM_027890          | 1.58 | 9.92E-03 |
| Gucy2g   | NM_001081076       | 1.58 | 2.19E-03 |
| Psg28    | NM_054063          | 1.58 | 3.84E-04 |
| Hmcn1    | ENSMUST00000074783 | 1.58 | 1.15E-02 |
| Slc25a33 | NM_027460          | 1.58 | 6.05E-04 |
| Il22ra1  | NM_178257          | 1.58 | 1.39E-02 |
| Lass6    | ENSMUST00000028426 | 1.58 | 7.01E-04 |
| Padi3    | NM_011060          | 1.58 | 2.61E-02 |
| Fgd5     | ENSMUST00000089334 | 1.58 | 2.87E-03 |
| Fkbp10   | NM_010221          | 1.58 | 3.94E-02 |
| Trim30b  | NM_175648          | 1.58 | 1.30E-02 |
| Mtap2    | NM_001039934       | 1.58 | 2.48E-02 |
| Angptl4  | ENSMUST00000002360 | 1.58 | 8.42E-03 |
| Fam198b  | NM_133187          | 1.57 | 2.67E-02 |
| Abtb2    | NM_178890          | 1.57 | 6.51E-03 |
| Pdgfb    | NM_011057          | 1.57 | 4.92E-04 |
| Med22    | NM_011513          | 1.57 | 4.13E-04 |
| Ddi1     | NM_027942          | 1.57 | 1.99E-03 |
| Fcgr4    | NM_144559          | 1.57 | 2.79E-02 |
| Sprr1a   | NM_009264          | 1.57 | 7.21E-03 |

|               |                    |      |          |
|---------------|--------------------|------|----------|
| Slc11a1       | NM_013612          | 1.57 | 5.85E-03 |
| Fzd8          | ENSMUST00000041080 | 1.57 | 1.50E-02 |
| Pomgnt1       | NM_026651          | 1.56 | 8.11E-05 |
| Ndrg1         | NM_008681          | 1.56 | 1.03E-02 |
| Nlrp9b        | NM_194058          | 1.56 | 3.29E-02 |
| Ovgp1         | NM_007696          | 1.56 | 8.77E-03 |
| Lphn2         | NM_001081298       | 1.56 | 3.56E-04 |
| Proc          | NM_001042768       | 1.56 | 5.20E-04 |
| Bmper         | NM_028472          | 1.56 | 2.40E-02 |
| Tmem146       | NM_175350          | 1.56 | 7.53E-03 |
| Chka          | NM_013490          | 1.56 | 9.23E-03 |
| Aox1          | NM_009676          | 1.56 | 1.99E-02 |
| Srsf12        | NM_177774          | 1.56 | 1.88E-02 |
| Cpm           | NM_027468          | 1.56 | 2.23E-02 |
| Tmeff1        | NM_021436          | 1.55 | 1.39E-02 |
| Pcdh18        | NM_130448          | 1.55 | 7.66E-03 |
| Sdc2          | NM_008304          | 1.55 | 6.37E-06 |
| A530064D06Rik | NM_178796          | 1.55 | 1.01E-02 |
| Col4a1        | NM_009931          | 1.55 | 1.56E-02 |
| Dpysl3        | NM_009468          | 1.55 | 4.89E-03 |
| Irs1          | NM_010570          | 1.55 | 1.35E-02 |
| Prnd          | NM_023043          | 1.55 | 2.00E-02 |
| Aif1l         | NM_145144          | 1.55 | 2.98E-02 |
| Bcl6b         | NM_007528          | 1.55 | 2.74E-03 |
| 1810011O10Rik | NM_026931          | 1.55 | 1.60E-03 |
| Fbxo36        | NM_025386          | 1.55 | 1.55E-02 |
| Aoah          | NM_012054          | 1.55 | 3.24E-02 |
| Hhex          | NM_008245          | 1.55 | 1.16E-03 |
| Il17rb        | NM_019583          | 1.55 | 3.82E-06 |
| Nrp1          | NM_008737          | 1.55 | 3.82E-03 |
| Clec5a        | NM_001038604       | 1.55 | 2.76E-02 |
| Ripk3         | NM_019955          | 1.55 | 2.19E-03 |
| Adarb1        | NR_004429          | 1.55 | 2.09E-04 |
| Csf3r         | NM_007782          | 1.55 | 4.34E-02 |
| D6Mm5e        | NM_033079          | 1.55 | 4.83E-04 |
| Ptprb         | NM_029928          | 1.55 | 2.85E-02 |
| Hmcn1         | NM_001024720       | 1.55 | 1.51E-02 |
| Cited2        | NM_010828          | 1.54 | 1.79E-03 |
| Slc16a1       | NM_009196          | 1.54 | 1.47E-02 |
| Ms4a7         | ENSMUST00000025574 | 1.54 | 1.18E-02 |
| Rps6ka5       | NM_153587          | 1.54 | 2.90E-03 |
| Bnip3         | NM_009760          | 1.54 | 4.14E-04 |
| Spred2        | BC040462           | 1.54 | 5.37E-04 |

|               |                    |      |          |
|---------------|--------------------|------|----------|
| 6330416G13Rik | ENSMUST00000077709 | 1.54 | 1.42E-02 |
| Socs2         | NM_007706          | 1.54 | 1.63E-03 |
| Scel          | NM_022886          | 1.54 | 4.44E-02 |
| Ninj1         | NM_013610          | 1.54 | 7.92E-04 |
| Hmcn1         | NM_001024720       | 1.54 | 2.07E-02 |
| Pid1          | NM_001003948       | 1.54 | 2.48E-02 |
| Mgarp         | NR_028121          | 1.53 | 3.39E-04 |
| Abpe          | NM_207262          | 1.53 | 5.31E-03 |
| Tfpi2         | NM_009364          | 1.53 | 3.02E-02 |
| Mir568        | NR_030576          | 1.53 | 2.14E-03 |
| Pcsk5         | NM_001190483       | 1.53 | 1.64E-02 |
| Irx1          | NM_010573          | 1.53 | 1.15E-02 |
| Cyp2d22       | NM_001163472       | 1.53 | 7.66E-03 |
| B3gnt9-ps     | ENSMUST00000136822 | 1.53 | 1.77E-02 |
| Lmo1          | NM_057173          | 1.53 | 1.95E-02 |
| Xcl1          | NM_008510          | 1.53 | 9.33E-03 |
| Tek           | NM_013690          | 1.53 | 3.08E-02 |
| A830039N20Rik | BC038501           | 1.53 | 7.71E-03 |
| Cyb5r1        | ENSMUST00000027726 | 1.52 | 7.92E-05 |
| Acad9         | NM_172678          | 1.52 | 9.68E-04 |
| Hmcn1         | NM_001024720       | 1.52 | 1.58E-02 |
| Gprin3        | ENSMUST00000051065 | 1.52 | 2.57E-03 |
| Hmcn1         | NM_001024720       | 1.52 | 2.98E-03 |
| Tnfaip2       | NM_009396          | 1.52 | 1.46E-02 |
| Gimap9        | NM_174960          | 1.52 | 1.06E-03 |
| Stard5        | NM_023377          | 1.52 | 5.14E-03 |
| Phgdh         | NM_016966          | 1.52 | 1.83E-02 |
| Ccl2          | NM_011333          | 1.51 | 1.18E-02 |
| Nhs1l         | NM_173390          | 1.51 | 1.15E-02 |
| Mir365-1      | NR_029855          | 1.51 | 3.17E-03 |
| Klhdc8a       | NM_144810          | 1.51 | 5.62E-03 |
| Mpp1          | NM_008621          | 1.51 | 1.56E-03 |
| Prickle1      | NM_001033217       | 1.51 | 2.72E-04 |
| Gm10791       | NR_045889          | 1.51 | 1.86E-05 |
| Dcbld1        | NM_025705          | 1.51 | 2.78E-04 |
| Tlr13         | NM_205820          | 1.51 | 4.57E-02 |
| Lamb1         | NM_008482          | 1.51 | 3.73E-02 |
| A830018L16Rik | NM_001160369       | 1.51 | 2.14E-02 |
| Lmcd1         | NM_144799          | 1.51 | 4.07E-02 |
| Ugt2b1        | ENSMUST00000031183 | 1.51 | 4.32E-02 |
| Pglyrp4       | NM_001165968       | 1.51 | 3.78E-02 |
| Trem2         | NM_031254          | 1.51 | 5.48E-03 |
| Pls3          | NM_145629          | 1.51 | 1.46E-04 |

|               |                    |       |          |
|---------------|--------------------|-------|----------|
| Hmcn1         | NM_001024720       | 1.51  | 2.90E-02 |
| Capn6         | NM_007603          | 1.51  | 3.90E-02 |
| Mt2           | NM_008630          | 1.51  | 3.14E-04 |
| Rcn3          | NM_026555          | 1.51  | 4.51E-02 |
| Igfbp5        | NM_010518          | 1.50  | 4.01E-02 |
| Ahnak2        | AK138503           | 1.50  | 6.94E-03 |
| Eng           | NM_001146350       | 1.50  | 4.71E-02 |
| Csf2rb        | NM_007780          | 1.50  | 1.12E-02 |
| Eltf1         | NM_133222          | 1.50  | 1.20E-02 |
| Sirpb1b       | NM_001173460       | 1.50  | 3.68E-02 |
| C1rl          | NM_181344          | 1.50  | 1.28E-03 |
| Fbln5         | NM_011812          | 1.50  | 1.50E-02 |
| Alb           | NM_009654          | 1.50  | 3.27E-02 |
| Ghr           | NM_010284          | 1.50  | 5.98E-04 |
| Fam63b        | NM_172772          | -1.50 | 6.22E-03 |
| Gda           | NM_010266          | -1.50 | 9.86E-03 |
| Olfr143       | NM_146806          | -1.50 | 6.14E-03 |
| Zfp459        | NM_177811          | -1.50 | 6.84E-04 |
| Stard3        | NM_021547          | -1.50 | 2.52E-04 |
| Gabre         | NM_017369          | -1.50 | 1.68E-04 |
| 4930572J05Rik | NM_198607          | -1.50 | 8.09E-03 |
| Lgals3bp      | NM_011150          | -1.50 | 5.56E-03 |
| Gramd1b       | ENSMUST00000165104 | -1.50 | 2.86E-03 |
| Hcn2          | NM_008226          | -1.50 | 2.47E-03 |
| Atp6ap2       | NM_027439          | -1.51 | 1.49E-04 |
| Scn2a1        | NM_001099298       | -1.51 | 2.31E-02 |
| Pik3c2b       | NM_001099276       | -1.51 | 2.10E-05 |
| Lpgat1        | NM_001134829       | -1.51 | 2.93E-02 |
| Ldlr          | NM_010700          | -1.51 | 7.03E-03 |
| Agfg2         | ENSMUST00000031736 | -1.51 | 9.25E-03 |
| Zfp618        | NM_028326          | -1.51 | 6.75E-05 |
| Scg5          | NM_009162          | -1.51 | 2.71E-02 |
| Kcng3         | NM_153512          | -1.51 | 1.51E-02 |
| Mir196a-1     | NR_029721          | -1.51 | 9.53E-03 |
| Zfp826        | BC086681           | -1.51 | 3.22E-03 |
| Pln           | NM_001141927       | -1.51 | 2.39E-02 |
| Hoxa5         | NM_010453          | -1.51 | 1.45E-03 |
| Tmtc2         | NM_177368          | -1.51 | 1.51E-04 |
| Gm13154       | NM_001014397       | -1.52 | 8.28E-03 |
| Chrd11        | NM_001114385       | -1.52 | 1.99E-02 |
| Frk           | NM_001159544       | -1.52 | 9.42E-05 |
| Ccdc109a      | NM_001033259       | -1.52 | 2.08E-06 |
| Pclo          | NM_011995          | -1.52 | 4.21E-02 |

|               |                    |       |          |
|---------------|--------------------|-------|----------|
| Kndc1         | NM_177261          | -1.52 | 4.16E-02 |
| Pde2a         | NM_001143848       | -1.52 | 3.36E-02 |
| Defb44-ps     | NR_002879          | -1.52 | 1.85E-02 |
| 2900055J20Rik | NR_045177          | -1.52 | 3.03E-02 |
| Gpx2          | NM_030677          | -1.52 | 5.09E-04 |
| Wnk4          | NM_175638          | -1.52 | 7.76E-03 |
| Foxp2         | NM_053242          | -1.52 | 1.28E-02 |
| Sema3f        | NM_011349          | -1.52 | 2.16E-03 |
| Pcbp3         | NM_021568          | -1.52 | 9.29E-03 |
| Mcm6          | NM_008567          | -1.52 | 3.60E-02 |
| Bex1          | NM_009052          | -1.53 | 1.38E-02 |
| Lrp4          | NM_172668          | -1.53 | 2.47E-02 |
| Prr16         | ENSMUST00000097576 | -1.53 | 1.48E-03 |
| Sp5           | NM_022435          | -1.53 | 1.92E-02 |
| Kctd14        | NM_001012434       | -1.53 | 2.50E-02 |
| Khdrbs3       | NM_010158          | -1.53 | 9.16E-03 |
| Hpn           | NM_001110252       | -1.53 | 4.51E-02 |
| Fam57a        | ENSMUST00000094014 | -1.53 | 9.91E-04 |
| 2410018L13Rik | BC063063           | -1.53 | 1.28E-02 |
| Unc5b         | NM_029770          | -1.53 | 1.38E-02 |
| Zfp57         | ENSMUST00000174524 | -1.53 | 1.43E-02 |
| Gm13251       | NM_001085522       | -1.54 | 6.87E-04 |
| Lpcat2        | NM_173014          | -1.54 | 4.18E-04 |
| Idh2          | NM_173011          | -1.54 | 1.79E-03 |
| Zfp961        | NM_001164581       | -1.54 | 2.75E-04 |
| Prkcz         | NM_008860          | -1.54 | 8.61E-04 |
| Hsd17b11      | NM_053262          | -1.54 | 8.55E-04 |
| Sh3bgrl2      | NM_172507          | -1.54 | 2.27E-03 |
| Slc17a9       | NM_183161          | -1.54 | 2.50E-02 |
| Fabp6         | ENSMUST00000020672 | -1.54 | 8.19E-04 |
| Aldh1a3       | NM_053080          | -1.54 | 4.00E-02 |
| Mboat2        | NM_026037          | -1.54 | 2.03E-02 |
| Abcd3         | NM_008991          | -1.54 | 1.93E-05 |
| Lipo1         | NM_001013770       | -1.54 | 8.55E-03 |
| Bcas1         | NM_029815          | -1.54 | 1.23E-02 |
| 9930005F22Rik | NM_001220499       | -1.55 | 2.16E-05 |
| Mbp           | NM_010777          | -1.55 | 1.96E-02 |
| Gipc2         | NM_016867          | -1.55 | 3.47E-03 |
| Kcnn2         | NM_080465          | -1.55 | 7.37E-03 |
| Anxa3         | NM_013470          | -1.55 | 3.21E-05 |
| Pdlim2        | NM_145978          | -1.55 | 9.16E-03 |
| Glt25d1       | NM_146211          | -1.55 | 3.61E-06 |
| Cnnm4         | NM_033570          | -1.55 | 6.19E-05 |

|               |                    |       |          |
|---------------|--------------------|-------|----------|
| Pwwp2a        | NM_027557          | -1.55 | 3.77E-04 |
| Olf890        | NM_146481          | -1.55 | 3.25E-02 |
| Arrb1         | NM_177231          | -1.55 | 1.95E-04 |
| Adamts13      | NM_001190374       | -1.55 | 7.41E-04 |
| Hoxa2         | NM_010451          | -1.55 | 8.66E-04 |
| Pla2g16       | NM_139269          | -1.55 | 1.86E-03 |
| Tchh          | NM_001163098       | -1.56 | 2.63E-03 |
| Efhd2         | NM_025994          | -1.56 | 7.93E-04 |
| Adam23        | NM_011780          | -1.56 | 2.50E-02 |
| Nell1         | NM_001037906       | -1.56 | 1.15E-02 |
| Nalcn         | NM_177393          | -1.56 | 1.47E-03 |
| Vav2          | ENSMUST00000056176 | -1.56 | 3.07E-04 |
| Gpr165        | NM_029536          | -1.56 | 2.41E-02 |
| Dgkg          | NM_138650          | -1.56 | 1.16E-02 |
| Ermp1         | NM_001081213       | -1.56 | 2.81E-04 |
| Gm10573       | XM_987080          | -1.56 | 7.25E-03 |
| 2410018L13Rik | BC063063           | -1.56 | 2.67E-03 |
| Pla2g1b       | NM_011107          | -1.56 | 1.49E-02 |
| Atp13a3       | NM_001128096       | -1.57 | 6.31E-03 |
| 3830431G21Rik | NM_001177503       | -1.57 | 3.82E-03 |
| Cadm1         | NM_207675          | -1.57 | 8.12E-04 |
| Mboat1        | NM_153546          | -1.57 | 1.08E-04 |
| Nlgn1         | NM_138666          | -1.57 | 5.68E-03 |
| Plekha6       | NM_182930          | -1.57 | 8.06E-04 |
| Extl1         | NM_019578          | -1.57 | 6.73E-03 |
| Gm1614        | AK146021           | -1.57 | 1.82E-04 |
| 4930588N13Rik | NM_029464          | -1.57 | 2.62E-03 |
| AA986860      | NM_177604          | -1.57 | 4.25E-03 |
| Vps13d        | ENSMUST00000020441 | -1.57 | 1.04E-03 |
| Hoxa6         | ENSMUST00000062829 | -1.57 | 2.94E-06 |
| Zfp599        | NM_181419          | -1.57 | 3.04E-03 |
| Ctnna2        | NM_001109764       | -1.57 | 3.80E-02 |
| Hmgcs1        | NM_145942          | -1.58 | 2.91E-03 |
| Acs11         | NM_007981          | -1.58 | 3.47E-03 |
| Slc25a10      | NM_013770          | -1.58 | 1.86E-03 |
| Amot          | NM_153319          | -1.58 | 5.13E-03 |
| Zfp462        | NM_172867          | -1.58 | 1.75E-03 |
| Lrg1          | NM_029796          | -1.58 | 2.19E-02 |
| 1700029I01Rik | NR_040355          | -1.58 | 1.99E-03 |
| Cdkn2c        | NM_007671          | -1.58 | 6.08E-04 |
| Bhlhe40       | NM_011498          | -1.58 | 1.16E-03 |
| Bco2          | NM_133217          | -1.58 | 9.50E-04 |
| Fam171b       | NM_175514          | -1.58 | 1.51E-02 |



|               |                    |       |          |
|---------------|--------------------|-------|----------|
| Lanc13        | NM_173414          | -1.58 | 2.17E-03 |
| Paqr4         | NM_023824          | -1.58 | 5.24E-05 |
| Snx31         | NM_025712          | -1.58 | 1.99E-03 |
| Gal3st1       | NM_016922          | -1.58 | 6.66E-04 |
| Vit           | NM_028813          | -1.59 | 1.09E-02 |
| Eml3          | NM_144872          | -1.59 | 3.02E-04 |
| Adcy5         | ENSMUST00000114913 | -1.59 | 4.64E-02 |
| Eya2          | ENSMUST00000063433 | -1.59 | 1.12E-04 |
| Kcnq5         | NM_001160139       | -1.59 | 6.93E-03 |
| Lrrc8e        | NM_028175          | -1.59 | 7.94E-03 |
| Wnt5a         | NM_009524          | -1.59 | 1.52E-02 |
| Adamdec1      | NM_021475          | -1.59 | 7.16E-03 |
| Cyp21a1       | NM_009995          | -1.59 | 1.66E-03 |
| Baiap2l1      | NM_025833          | -1.59 | 3.16E-05 |
| Klk1b4        | NM_010915          | -1.60 | 2.53E-02 |
| D730001G18Rik | NR_027836          | -1.60 | 4.87E-02 |
| Solh          | ENSMUST00000041641 | -1.60 | 8.37E-04 |
| Arhgef38      | ENSMUST00000147041 | -1.60 | 1.91E-03 |
| Slc28a3       | NM_022317          | -1.60 | 6.80E-04 |
| Samd9l        | NM_010156          | -1.60 | 1.68E-02 |
| Myof          | NM_001099634       | -1.60 | 1.21E-05 |
| Fgf13         | NM_010200          | -1.61 | 4.07E-02 |
| Slc4a7        | NM_001033270       | -1.61 | 3.73E-05 |
| Krt78         | NM_212487          | -1.61 | 2.05E-02 |
| Nefh          | NM_010904          | -1.61 | 3.93E-02 |
| Sgsm1         | NM_172718          | -1.61 | 3.61E-02 |
| Ttyh3         | NM_175274          | -1.61 | 4.83E-04 |
| Rap1gap       | NM_001081155       | -1.61 | 2.14E-02 |
| Sdcbp2        | NM_145535          | -1.61 | 1.02E-05 |
| Ptprn2        | NM_011215          | -1.61 | 1.89E-03 |
| Zfp667        | NM_001024928       | -1.61 | 2.69E-02 |
| Nr2f2         | NM_009697          | -1.61 | 7.18E-06 |
| Il18          | NM_008360          | -1.61 | 1.39E-04 |
| Per3          | NM_011067          | -1.62 | 4.63E-02 |
| Ggh           | NM_010281          | -1.62 | 1.27E-03 |
| Ggh           | NM_010281          | -1.62 | 1.27E-03 |
| Cobl          | NM_172496          | -1.62 | 4.76E-03 |
| Atrnl1        | NM_181415          | -1.62 | 4.59E-05 |
| Rasal1        | NM_013832          | -1.62 | 9.11E-04 |
| Gusb          | ENSMUST00000026613 | -1.62 | 3.46E-03 |
| Pag1          | NM_001195031       | -1.62 | 2.77E-03 |
| Prr15l        | ENSMUST00000107636 | -1.62 | 5.65E-04 |
| Akap12        | NM_031185          | -1.62 | 3.57E-02 |

|               |                    |       |          |
|---------------|--------------------|-------|----------|
| Slk           | NM_009289          | -1.62 | 3.28E-05 |
| Fblim1        | ENSMUST00000006381 | -1.62 | 2.27E-03 |
| Slc52a3       | NM_001164819       | -1.62 | 3.42E-02 |
| Opn3          | NM_010098          | -1.63 | 9.66E-03 |
| Foxc1         | NM_008592          | -1.63 | 8.37E-04 |
| Myh14         | NM_028021          | -1.63 | 1.04E-02 |
| Avpi1         | NM_027106          | -1.63 | 4.79E-05 |
| Pmaip1        | NM_021451          | -1.63 | 9.45E-03 |
| Slc9a4        | NM_177084          | -1.63 | 1.20E-02 |
| Mcf2l         | NM_178076          | -1.64 | 6.35E-03 |
| Sp110         | NM_175397          | -1.64 | 3.98E-04 |
| Gcnt3         | NM_028087          | -1.64 | 4.94E-02 |
| Fam63b        | NM_172772          | -1.64 | 1.56E-03 |
| Sftpd         | NM_009160          | -1.64 | 1.52E-02 |
| Tmem98        | NM_029537          | -1.65 | 1.17E-03 |
| Sym           | NM_201639          | -1.65 | 2.16E-02 |
| Capsl         | NM_029341          | -1.65 | 2.63E-02 |
| Syt12         | ENSMUST00000032846 | -1.65 | 3.36E-03 |
| Nt5c2         | NR_028353          | -1.65 | 1.98E-05 |
| Ap1s3         | NM_183027          | -1.65 | 4.87E-04 |
| Rad5111       | NM_009014          | -1.65 | 5.15E-04 |
| Klf3          | NM_008453          | -1.65 | 7.40E-05 |
| Fam124a       | NM_001243857       | -1.66 | 6.53E-03 |
| Mfsd4         | NM_001114662       | -1.66 | 3.92E-03 |
| Myoc          | NM_010865          | -1.66 | 4.23E-03 |
| Kcna2         | NM_008417          | -1.66 | 9.76E-03 |
| Clic6         | NM_172469          | -1.66 | 5.66E-03 |
| Slc34a2       | NM_011402          | -1.66 | 9.41E-03 |
| Cdk6          | ENSMUST00000042410 | -1.66 | 4.00E-07 |
| Adap1         | NM_172723          | -1.66 | 4.45E-05 |
| Sulf2         | ENSMUST00000109249 | -1.66 | 5.13E-04 |
| Rnf152        | NM_178779          | -1.66 | 4.24E-04 |
| Itih5         | NM_172471          | -1.66 | 3.80E-02 |
| Cntn1         | NM_007727          | -1.66 | 9.75E-03 |
| Gsdmd         | NM_026960          | -1.67 | 9.60E-06 |
| Slc35f1       | NM_178675          | -1.67 | 2.24E-02 |
| Sprr2b        | NM_011469          | -1.67 | 4.44E-05 |
| Idh1          | NM_010497          | -1.67 | 6.56E-05 |
| C530008M17Rik | ENSMUST00000125922 | -1.67 | 1.57E-02 |
| Eepd1         | NM_026189          | -1.67 | 6.19E-04 |
| Rassf7        | NM_025886          | -1.67 | 4.60E-05 |
| Fam13a        | NM_153574          | -1.68 | 2.86E-04 |
| Klf10         | NM_013692          | -1.68 | 4.91E-05 |

|               |                    |       |          |
|---------------|--------------------|-------|----------|
| Chml          | NM_021350          | -1.68 | 3.59E-04 |
| Stxbp5l       | ENSMUST00000114787 | -1.68 | 2.60E-02 |
| Clic3         | NM_027085          | -1.68 | 5.79E-03 |
| Npy2r         | NM_008731          | -1.68 | 1.69E-02 |
| D130040H23Rik | NM_172491          | -1.68 | 2.35E-03 |
| Olf894        | NM_146868          | -1.68 | 1.56E-04 |
| Gm15401       | NR_040421          | -1.68 | 3.04E-02 |
| Pof1b         | NM_181579          | -1.68 | 9.67E-04 |
| Noxo1         | NM_027988          | -1.68 | 1.04E-03 |
| Fxyd7         | NM_022007          | -1.69 | 4.81E-02 |
| Cant1         | ENSMUST00000017620 | -1.69 | 5.82E-05 |
| Plp1          | ENSMUST00000033800 | -1.69 | 3.76E-02 |
| Cdh2          | NM_007664          | -1.69 | 1.59E-02 |
| Tspan15       | NM_197996          | -1.69 | 2.34E-02 |
| Atp4a         | NM_018731          | -1.69 | 3.77E-02 |
| Foxq1         | NM_008239          | -1.69 | 2.34E-04 |
| 6330403A02Rik | NM_001081227       | -1.69 | 1.35E-03 |
| Cyp2b9        | NM_010000          | -1.70 | 1.29E-05 |
| Aqp11         | NM_175105          | -1.70 | 6.71E-03 |
| Hoxa7         | NM_010455          | -1.70 | 6.56E-06 |
| Rab3b         | NM_023537          | -1.70 | 6.01E-04 |
| Cfi           | NM_007686          | -1.70 | 3.22E-03 |
| Sval3         | NM_001003952       | -1.70 | 1.83E-02 |
| Nans          | NM_053179          | -1.70 | 2.89E-04 |
| Efnb2         | NM_010111          | -1.70 | 2.56E-07 |
| Chst8         | NM_175140          | -1.70 | 3.95E-04 |
| 4833442J19Rik | NM_001252094       | -1.70 | 2.00E-05 |
| 2010300C02Rik | NM_028096          | -1.70 | 1.04E-04 |
| Zbtb7c        | NM_145356          | -1.71 | 2.67E-02 |
| Tmod2         | NM_016711          | -1.71 | 2.84E-02 |
| Bcl2          | NM_009741          | -1.71 | 1.22E-03 |
| Spr2a1        | NM_011468          | -1.71 | 4.06E-04 |
| 9130404H23Rik | NM_028998          | -1.71 | 9.30E-04 |
| Trim6         | NM_001013616       | -1.71 | 2.13E-03 |
| Socs6         | NM_018821          | -1.72 | 5.16E-05 |
| Mir200a       | NR_029723          | -1.72 | 2.35E-04 |
| Anxa13        | NM_027211          | -1.72 | 1.08E-03 |
| Ppm1l         | NM_178726          | -1.72 | 7.54E-05 |
| Ppl           | NM_008909          | -1.72 | 1.69E-03 |
| Fez1          | ENSMUST00000034630 | -1.72 | 1.76E-03 |
| Slco1a6       | NM_023718          | -1.73 | 1.75E-03 |
| Trim36        | NM_178872          | -1.73 | 2.34E-02 |
| Hoxa3         | NM_010452          | -1.73 | 1.62E-04 |

|               |                    |       |          |
|---------------|--------------------|-------|----------|
| Plac8         | NM_139198          | -1.73 | 2.30E-02 |
| Naip2         | NM_010872          | -1.73 | 5.70E-05 |
| Ppfibp2       | NM_008905          | -1.73 | 2.00E-04 |
| Zfp617        | NM_133358          | -1.74 | 1.17E-04 |
| Ndn           | NM_010882          | -1.74 | 1.69E-02 |
| Klk1b24       | NM_010643          | -1.74 | 1.89E-02 |
| Xdh           | NM_011723          | -1.74 | 1.05E-02 |
| 5730559C18Rik | NM_028872          | -1.74 | 2.73E-04 |
| Eml6          | NM_146016          | -1.74 | 8.98E-03 |
| Mgat4a        | ENSMUST00000042161 | -1.74 | 4.21E-05 |
| Gm7285        | XR_142151          | -1.75 | 7.72E-04 |
| G930009F23Rik | AK145170           | -1.75 | 7.75E-03 |
| Slco4c1       | NM_172658          | -1.75 | 8.08E-03 |
| Map3k5        | NM_008580          | -1.75 | 4.70E-05 |
| Atp6v1b1      | NM_134157          | -1.75 | 2.06E-02 |
| Chrm2         | NM_203491          | -1.76 | 4.47E-03 |
| Tjp3          | NM_013769          | -1.76 | 1.94E-04 |
| Dnajc17       | NM_139139          | -1.76 | 1.72E-04 |
| Fgf14         | ENSMUST00000026631 | -1.76 | 6.91E-04 |
| Slc41a3       | NM_027868          | -1.76 | 7.16E-03 |
| Dmrt2         | NM_145831          | -1.77 | 1.67E-02 |
| Asb11         | NM_026853          | -1.77 | 1.64E-02 |
| Cdo1          | NM_033037          | -1.77 | 3.82E-02 |
| Degs2         | NM_027299          | -1.77 | 1.95E-02 |
| Gm13154       | NM_001014397       | -1.77 | 1.46E-02 |
| Ogn           | NM_008760          | -1.78 | 2.14E-03 |
| Smoc2         | NM_022315          | -1.78 | 1.50E-03 |
| Crispld1      | ENSMUST00000095075 | -1.78 | 7.68E-03 |
| Peg10         | NM_130877          | -1.78 | 1.64E-02 |
| Slc44a4       | NM_023557          | -1.78 | 1.07E-05 |
| Crym          | NM_016669          | -1.78 | 4.01E-02 |
| Ly6g6e        | NM_027366          | -1.78 | 7.52E-03 |
| Tfcp2l1       | NM_023755          | -1.78 | 2.44E-04 |
| Tnxb          | NM_031176          | -1.78 | 4.08E-02 |
| Lysmd2        | NM_027309          | -1.79 | 1.21E-04 |
| Syt13         | NM_031395          | -1.80 | 3.40E-03 |
| Sh3tc1        | NM_194344          | -1.80 | 4.23E-03 |
| Sh3pxd2a      | NM_008018          | -1.80 | 2.60E-05 |
| Gm13139       | NM_001083918       | -1.80 | 4.63E-03 |
| Tnfaip8       | ENSMUST00000126883 | -1.80 | 4.59E-04 |
| Ppp2r2b       | NM_028392          | -1.80 | 2.06E-02 |
| Ick           | NM_019987          | -1.81 | 1.86E-05 |
| Ascl1         | NM_008553          | -1.82 | 2.83E-02 |

|               |                    |       |          |
|---------------|--------------------|-------|----------|
| Wdr76         | NM_030234          | -1.82 | 2.74E-04 |
| Rdh16         | NM_009040          | -1.82 | 1.30E-04 |
| 9930012K11Rik | NM_001004155       | -1.83 | 9.68E-04 |
| 2200002D01Rik | ENSMUST00000032808 | -1.83 | 1.19E-06 |
| Apol7a        | NM_029419          | -1.83 | 5.12E-03 |
| Ttll7         | NM_027594          | -1.83 | 5.28E-03 |
| D14Ert449e    | NM_025311          | -1.84 | 9.36E-04 |
| Kcnh2         | NM_013569          | -1.84 | 1.04E-02 |
| Efemp1        | NM_146015          | -1.85 | 2.64E-03 |
| Meis2         | NM_001136072       | -1.85 | 2.20E-03 |
| Zfp467        | NM_020589          | -1.85 | 3.70E-03 |
| S100a6        | NM_011313          | -1.85 | 4.17E-03 |
| Smpd3         | NM_021491          | -1.85 | 5.71E-04 |
| Has3          | NM_008217          | -1.85 | 3.73E-03 |
| D14Ert449e    | NM_025311          | -1.86 | 1.06E-03 |
| Cntn3         | ENSMUST00000032159 | -1.86 | 2.45E-03 |
| Acot11        | NM_025590          | -1.86 | 2.42E-04 |
| Socs6         | NM_018821          | -1.86 | 9.51E-04 |
| Arhgef4       | NM_183019          | -1.87 | 1.63E-04 |
| Epha4         | NM_007936          | -1.87 | 2.60E-04 |
| Syt9          | NM_021889          | -1.87 | 8.74E-03 |
| Agr2          | NM_011783          | -1.87 | 8.73E-04 |
| Wnt4          | NM_009523          | -1.87 | 2.84E-04 |
| Kcne4         | NM_021342          | -1.88 | 1.88E-03 |
| D14Ert449e    | NM_025311          | -1.88 | 1.05E-03 |
| Spr2a2        | ENSMUST00000090872 | -1.88 | 3.64E-04 |
| Spr2a2        | ENSMUST00000090872 | -1.88 | 3.64E-04 |
| Faim2         | NM_028224          | -1.89 | 3.87E-02 |
| Retnla        | NM_020509          | -1.89 | 4.58E-02 |
| Sorbs1        | NM_178362          | -1.89 | 1.87E-02 |
| Gata2         | NM_008090          | -1.90 | 9.91E-03 |
| Arhgef4       | ENSMUST00000159747 | -1.90 | 1.86E-04 |
| Zfp872        | NM_001033813       | -1.90 | 1.77E-03 |
| Mall          | NM_145532          | -1.90 | 6.04E-03 |
| Efh1          | NM_028889          | -1.90 | 1.82E-02 |
| F3            | NM_010171          | -1.90 | 2.07E-04 |
| Itpr2         | NM_019923          | -1.91 | 7.42E-07 |
| Hsd17b14      | NM_025330          | -1.91 | 1.09E-03 |
| Zfp185        | NM_009549          | -1.92 | 4.23E-04 |
| Dcxr          | NM_026428          | -1.92 | 2.67E-04 |
| Syp           | NM_009305          | -1.92 | 4.82E-02 |
| 4933436C20Rik | NR_033641          | -1.92 | 1.44E-03 |
| Capn5         | NM_007602          | -1.93 | 1.21E-06 |

|               |                    |       |          |
|---------------|--------------------|-------|----------|
| Acacb         | NM_133904          | -1.93 | 2.95E-05 |
| Ank2          | ENSMUST00000166157 | -1.93 | 3.87E-02 |
| Mir31         | NR_029747          | -1.93 | 6.12E-03 |
| Abca8a        | NM_153145          | -1.93 | 5.90E-05 |
| Lynx1         | NM_011838          | -1.94 | 1.10E-04 |
| Plcx3         | NM_177355          | -1.94 | 5.76E-03 |
| Ttll7         | NM_027594          | -1.94 | 5.78E-04 |
| Hmgcs2        | NM_008256          | -1.95 | 2.80E-03 |
| Camk1d        | NM_177343          | -1.95 | 2.46E-02 |
| Aldh3b2       | NM_001177438       | -1.95 | 9.36E-04 |
| 1700001C19Rik | NM_029296          | -1.95 | 1.05E-04 |
| Pcp411        | NM_025557          | -1.95 | 4.51E-02 |
| Qsox1         | NM_001024945       | -1.95 | 5.05E-04 |
| Fzd3          | NM_021458          | -1.96 | 9.19E-04 |
| Kif19a        | NM_001102615       | -1.97 | 2.20E-04 |
| Golm1         | NM_027307          | -1.97 | 4.98E-04 |
| Sp110         | NM_175397          | -1.97 | 1.86E-04 |
| Sp110         | NM_175397          | -1.97 | 1.86E-04 |
| Gm11545       | NM_001105561       | -1.97 | 2.16E-04 |
| Mst1r         | NM_009074          | -1.97 | 1.82E-03 |
| Inmt          | NM_009349          | -1.98 | 2.17E-04 |
| Dgkb          | NM_178681          | -1.98 | 3.21E-02 |
| Lepr          | NM_001122899       | -1.98 | 2.40E-04 |
| Rasgef1a      | NM_027526          | -1.98 | 1.62E-04 |
| Glde          | NM_138595          | -1.99 | 2.73E-04 |
| O3far1        | NM_181748          | -1.99 | 2.53E-03 |
| Aldh3b2       | NM_001177438       | -1.99 | 6.87E-04 |
| 2510049J12Rik | NM_001101431       | -2.00 | 6.26E-04 |
| Gm1965        | BC147526           | -2.00 | 1.81E-02 |
| Gsn           | NM_001206367       | -2.00 | 2.54E-05 |
| Cpxm2         | NM_018867          | -2.00 | 7.37E-03 |
| Mir429        | NR_029958          | -2.00 | 2.20E-04 |
| Omp           | NM_011010          | -2.00 | 3.36E-04 |
| S100a14       | NM_001163525       | -2.01 | 3.92E-03 |
| Galnt7        | NM_144731          | -2.01 | 1.03E-02 |
| Tst           | NM_009437          | -2.01 | 3.80E-04 |
| Casp1         | ENSMUST00000027015 | -2.01 | 4.30E-03 |
| Creb3l4       | NM_030080          | -2.02 | 7.46E-03 |
| Cd14          | NM_009841          | -2.02 | 4.08E-05 |
| A530032D15Rik | NM_213615          | -2.02 | 2.85E-03 |
| Aim11         | NM_001162970       | -2.02 | 2.95E-05 |
| Naip6         | NM_010871          | -2.02 | 6.57E-04 |
| Wnt4          | NM_009523          | -2.03 | 3.03E-04 |

|               |                    |       |          |
|---------------|--------------------|-------|----------|
| Upk2          | NM_009476          | -2.03 | 7.72E-04 |
| Homer2        | NM_011983          | -2.03 | 8.59E-04 |
| Abca8b        | NM_013851          | -2.03 | 4.17E-04 |
| Spire2        | NM_172287          | -2.04 | 2.51E-04 |
| 3632451O06Rik | BC023359           | -2.04 | 6.87E-03 |
| 1700055N04Rik | NM_028545          | -2.05 | 2.57E-03 |
| AI427809      | NR_033139          | -2.06 | 1.37E-02 |
| Nt5dc3        | NM_175331          | -2.06 | 1.27E-06 |
| Syt16         | NM_172804          | -2.06 | 4.73E-06 |
| Fam107a       | NM_183187          | -2.07 | 1.23E-04 |
| Ppp1r9a       | NM_181595          | -2.07 | 1.33E-06 |
| Tnfaip8       | NM_134131          | -2.07 | 1.50E-04 |
| Gmds          | NM_146041          | -2.07 | 4.93E-06 |
| Cdc42ep5      | NM_021454          | -2.08 | 3.97E-05 |
| Spock2        | ENSMUST00000121820 | -2.09 | 1.85E-03 |
| Tmprss2       | NM_015775          | -2.09 | 3.94E-05 |
| Tacstd2       | NM_020047          | -2.09 | 3.32E-05 |
| Ppargc1b      | NM_133249          | -2.09 | 4.19E-05 |
| Gabrp         | NM_146017          | -2.10 | 1.08E-02 |
| Col25a1       | NM_029838          | -2.10 | 1.53E-03 |
| Rnf150        | NM_177378          | -2.11 | 1.90E-04 |
| Klf5          | NM_009769          | -2.11 | 5.63E-04 |
| Tnfsf10       | NM_009425          | -2.12 | 1.33E-05 |
| Prodh         | NM_011172          | -2.12 | 5.92E-04 |
| Sp110         | NM_175397          | -2.13 | 2.40E-04 |
| Tox3          | ENSMUST00000109621 | -2.14 | 3.43E-03 |
| Clip4         | NM_030179          | -2.14 | 5.27E-04 |
| 1700016M24Rik | BC111897           | -2.14 | 9.13E-05 |
| Gpr83         | NM_010287          | -2.14 | 9.11E-05 |
| Sema3c        | NM_013657          | -2.15 | 2.53E-04 |
| Homer2        | NM_011983          | -2.15 | 6.13E-03 |
| Slc37a1       | NM_153062          | -2.15 | 4.86E-05 |
| Mal           | NM_010762          | -2.15 | 4.95E-05 |
| Kctd12b       | NM_175429          | -2.15 | 1.67E-03 |
| Psap11        | NM_175249          | -2.16 | 3.48E-03 |
| Igsf9b        | NM_001129787       | -2.16 | 1.20E-04 |
| Gpa33         | ENSMUST00000060833 | -2.16 | 3.37E-03 |
| Por           | NM_008898          | -2.16 | 1.02E-04 |
| Sowaha        | NM_183173          | -2.16 | 3.99E-04 |
| Arhgef4       | ENSMUST00000159747 | -2.17 | 9.85E-04 |
| 5730507C01Rik | NM_001201330       | -2.18 | 1.82E-03 |
| Ttc22         | NM_177667          | -2.18 | 1.45E-04 |
| Nrxn1         | NM_020252          | -2.19 | 1.86E-03 |

|               |                    |       |          |
|---------------|--------------------|-------|----------|
| Lrrc26        | NM_146117          | -2.19 | 3.09E-05 |
| Spats2l       | NM_144882          | -2.19 | 1.16E-03 |
| Gm16432       | NM_001034899       | -2.19 | 1.25E-04 |
| Ano9          | NM_178381          | -2.19 | 3.45E-04 |
| Rapgef1l      | NM_001080925       | -2.19 | 4.22E-04 |
| Trim31        | NM_146077          | -2.19 | 2.99E-03 |
| Adra2a        | NM_007417          | -2.20 | 9.64E-03 |
| A530040E14Rik | BC100303           | -2.21 | 7.00E-03 |
| A530040E14Rik | BC100303           | -2.21 | 7.00E-03 |
| Dhrs9         | NM_175512          | -2.21 | 5.45E-03 |
| Klk1b2l       | NM_010642          | -2.23 | 1.61E-02 |
| Rbfox3        | NM_001039167       | -2.24 | 1.35E-02 |
| Reep6         | NM_139292          | -2.26 | 4.71E-08 |
| Napepld       | NM_178728          | -2.26 | 9.23E-04 |
| Galnt4        | NM_015737          | -2.29 | 3.84E-05 |
| Naip5         | NM_010870          | -2.29 | 1.93E-04 |
| Sestd1        | NM_175465          | -2.30 | 5.89E-05 |
| Sox2          | NM_011443          | -2.31 | 1.72E-06 |
| A530040E14Rik | BC100303           | -2.32 | 5.14E-03 |
| A530040E14Rik | BC100303           | -2.32 | 5.14E-03 |
| Xkr4          | NM_001011874       | -2.32 | 1.10E-04 |
| Pparg         | NM_001127330       | -2.32 | 7.81E-05 |
| Cmbl          | NM_181588          | -2.32 | 1.18E-04 |
| Tspan2        | ENSMUST00000029451 | -2.32 | 9.01E-04 |
| Hnf4g         | NM_013920          | -2.34 | 4.01E-04 |
| 9030619P08Rik | NM_001039720       | -2.35 | 2.22E-02 |
| Paqr6         | NM_198410          | -2.35 | 3.36E-05 |
| Fut8          | NM_001252614       | -2.35 | 1.32E-05 |
| Olf893        | NM_146336          | -2.36 | 5.51E-03 |
| Ugt8a         | NM_011674          | -2.37 | 5.12E-03 |
| Hsh2d         | ENSMUST00000165324 | -2.38 | 6.33E-04 |
| Agt           | NM_007428          | -2.38 | 2.03E-02 |
| Tnip3         | NM_001001495       | -2.38 | 2.12E-03 |
| Tmie          | NM_146260          | -2.39 | 4.39E-05 |
| Ret           | NM_001080780       | -2.39 | 3.89E-02 |
| Rab6b         | NM_173781          | -2.40 | 5.20E-03 |
| Arhgef4       | ENSMUST00000159747 | -2.40 | 1.36E-04 |
| Bace2         | NM_019517          | -2.40 | 1.40E-05 |
| C130026I21Rik | NM_175219          | -2.40 | 4.04E-04 |
| Efcab4b       | NM_001033464       | -2.41 | 1.06E-03 |
| 4930452B06Rik | NM_028934          | -2.42 | 5.26E-05 |
| Adam28        | NM_010082          | -2.42 | 4.73E-05 |
| Tmem22        | NM_001101483       | -2.42 | 8.39E-04 |



|               |              |       |          |
|---------------|--------------|-------|----------|
| Plac9         | NM_207229    | -2.42 | 7.67E-05 |
| Plac9         | NM_207229    | -2.42 | 7.67E-05 |
| B3galt5       | NM_033149    | -2.43 | 1.42E-02 |
| BC005685      | BC005685     | -2.43 | 3.40E-03 |
| Plac9         | NM_207229    | -2.45 | 8.76E-05 |
| Sh3gl2        | NM_019535    | -2.46 | 3.08E-03 |
| Slc39a4       | NM_028064    | -2.46 | 2.64E-04 |
| Sh2d4a        | NM_028182    | -2.46 | 6.10E-06 |
| L1cam         | NM_008478    | -2.47 | 3.07E-03 |
| Hif3a         | NM_016868    | -2.48 | 1.47E-03 |
| Sh3rf2        | NM_001146299 | -2.49 | 5.60E-05 |
| Npnt          | NM_033525    | -2.50 | 6.27E-04 |
| Abcg8         | NM_026180    | -2.56 | 3.91E-03 |
| Upk1b         | NM_178924    | -2.58 | 1.13E-03 |
| Prss27        | NM_175440    | -2.59 | 3.81E-03 |
| BC005685      | BC005685     | -2.59 | 3.10E-03 |
| Als2cl        | NM_001146059 | -2.60 | 8.95E-05 |
| Krt23         | NM_033373    | -2.60 | 2.40E-03 |
| Tprn          | NM_175286    | -2.62 | 1.49E-05 |
| BC005685      | BC005685     | -2.62 | 3.26E-03 |
| Pde8b         | NM_172263    | -2.62 | 1.78E-04 |
| Tbx1          | NM_011532    | -2.63 | 5.85E-04 |
| Reg3g         | NM_011260    | -2.63 | 5.78E-05 |
| Chga          | NM_007693    | -2.64 | 2.41E-04 |
| Lass3         | NM_001164201 | -2.64 | 2.94E-04 |
| BC030870      | NR_033217    | -2.65 | 2.06E-05 |
| Gprc5a        | NM_181444    | -2.67 | 7.23E-05 |
| Fa2h          | NM_178086    | -2.68 | 5.80E-04 |
| Sult1e1       | NM_023135    | -2.70 | 1.02E-02 |
| Tmprss4       | NM_145403    | -2.72 | 1.67E-04 |
| Rab27a        | NM_023635    | -2.74 | 3.06E-05 |
| Cyp2f2        | NM_007817    | -2.74 | 2.35E-04 |
| BC005685      | BC005685     | -2.75 | 3.23E-03 |
| Gnao1         | NM_010308    | -2.76 | 1.02E-03 |
| Ces1d         | NM_053200    | -2.77 | 2.99E-02 |
| 1110017F19Rik | NM_001162998 | -2.80 | 2.80E-04 |
| Cln2          | NM_009900    | -2.82 | 2.78E-06 |
| Slc12a8       | NM_134251    | -2.83 | 1.82E-02 |
| Cdh19         | NM_001081386 | -2.84 | 1.30E-02 |
| Elfn1         | NM_175522    | -2.86 | 4.48E-04 |
| Lgi1          | NM_020278    | -2.87 | 3.50E-03 |
| Gsto1         | NM_010362    | -2.89 | 4.61E-07 |
| Snhg11        | NM_175692    | -2.89 | 3.21E-03 |

|               |                    |       |          |
|---------------|--------------------|-------|----------|
| Gsta3         | NM_001077353       | -2.89 | 4.33E-03 |
| Fam40b        | NM_177204          | -2.90 | 3.78E-06 |
| Fam83e        | NM_001033170       | -2.92 | 1.14E-04 |
| Styk1         | NM_172891          | -2.94 | 3.11E-05 |
| Hpse          | NM_152803          | -2.95 | 2.34E-04 |
| Chic1         | NM_009767          | -2.97 | 4.36E-05 |
| Mcoln2        | NM_026656          | -2.99 | 5.98E-06 |
| B3gnt3        | NM_028189          | -3.00 | 5.25E-05 |
| Duxbl         | NM_183389          | -3.00 | 3.26E-05 |
| Gm13235       | AB010326           | -3.00 | 3.85E-03 |
| Gm13235       | AB010326           | -3.00 | 3.85E-03 |
| LOC641050     | M11024             | -3.06 | 2.61E-03 |
| Serpinb11     | NM_025867          | -3.06 | 4.66E-05 |
| Susd4         | NM_144796          | -3.09 | 3.24E-04 |
| 2310007B03Rik | NM_172411          | -3.09 | 4.29E-04 |
| LOC641050     | M11024             | -3.10 | 3.46E-03 |
| Gm1965        | ENSMUST00000162900 | -3.10 | 1.11E-02 |
| Sult1c2       | NM_026935          | -3.12 | 3.91E-03 |
| Ces2g         | NM_197999          | -3.13 | 2.81E-07 |
| Tmc5          | NM_001105252       | -3.14 | 1.84E-04 |
| Ccnjl         | NM_001045530       | -3.15 | 4.34E-03 |
| LOC641050     | M11024             | -3.17 | 3.51E-03 |
| Mecom         | ENSMUST00000108271 | -3.18 | 2.71E-05 |
| Fgfr3         | NM_008010          | -3.22 | 3.66E-04 |
| Chic1         | NM_009767          | -3.23 | 6.73E-05 |
| Elf3          | NM_001163131       | -3.24 | 1.97E-06 |
| Arhgap40      | NM_001145015       | -3.24 | 4.52E-06 |
| Kcnh6         | NM_001037712       | -3.26 | 1.89E-02 |
| Mecom         | NM_021442          | -3.26 | 2.46E-05 |
| LOC641050     | M11024             | -3.30 | 2.44E-03 |
| Fbp2          | NM_007994          | -3.31 | 1.28E-05 |
| Atoh1         | NM_007500          | -3.33 | 3.09E-02 |
| Klk1          | NM_010639          | -3.34 | 6.51E-03 |
| Duxbl         | NM_183389          | -3.35 | 1.01E-05 |
| Duxbl         | NM_183389          | -3.35 | 1.01E-05 |
| Dgat2         | NM_026384          | -3.37 | 1.46E-04 |
| Fer1l4        | NM_001136556       | -3.39 | 8.02E-06 |
| Cnksr2        | NM_177751          | -3.40 | 1.08E-04 |
| Pcp4          | ENSMUST00000061739 | -3.40 | 1.13E-02 |
| Wdr49         | XM_003086309       | -3.41 | 2.99E-06 |
| Mgat3         | NM_010795          | -3.42 | 7.33E-05 |
| Muc4          | NM_080457          | -3.43 | 3.30E-05 |
| Acsm3         | NM_016870          | -3.46 | 1.50E-03 |

|               |                    |       |          |
|---------------|--------------------|-------|----------|
| Kcnq1         | NM_008434          | -3.46 | 2.32E-04 |
| Gm6020        | AB010317           | -3.48 | 4.24E-04 |
| Ripply3       | NM_133229          | -3.48 | 2.50E-04 |
| Ccdc129       | NM_001081665       | -3.49 | 1.89E-03 |
| Engase        | NM_172573          | -3.49 | 1.40E-05 |
| Ms4a8a        | NM_022430          | -3.49 | 1.14E-02 |
| Gsdmc         | NM_031378          | -3.50 | 7.35E-06 |
| Ttll6         | NM_172799          | -3.52 | 1.60E-04 |
| Insrr         | NM_011832          | -3.52 | 1.92E-02 |
| Hgfac         | NM_019447          | -3.53 | 1.28E-03 |
| Naip1         | NM_008670          | -3.53 | 9.11E-05 |
| Syt8          | NM_018802          | -3.53 | 2.32E-06 |
| Gsta4         | NM_010357          | -3.59 | 3.99E-06 |
| Gpc3          | NM_016697          | -3.60 | 4.11E-03 |
| Fam3b         | NM_020622          | -3.68 | 2.12E-04 |
| Pllp          | NM_026385          | -3.68 | 7.53E-06 |
| Csprs         | NM_033616          | -3.73 | 1.65E-04 |
| Ppp1r1b       | NM_144828          | -3.79 | 5.10E-07 |
| 2210407C18Rik | NM_144544          | -3.85 | 3.82E-03 |
| Tc2n          | ENSMUST00000110047 | -3.88 | 1.84E-06 |
| Chad          | NM_007689          | -3.89 | 4.01E-05 |
| Muc5b         | NM_028801          | -3.93 | 1.54E-02 |
| Tnfrsf19      | NM_013869          | -3.95 | 1.02E-06 |
| Fut9          | ENSMUST00000084770 | -3.99 | 2.66E-04 |
| Cbr2          | NM_007621          | -4.01 | 1.02E-04 |
| Gm7609        | NM_001081746       | -4.03 | 2.13E-04 |
| Scnn1a        | NM_011324          | -4.05 | 1.67E-04 |
| Krt7          | NM_033073          | -4.06 | 9.13E-06 |
| Atp2a3        | NM_016745          | -4.10 | 8.47E-05 |
| Gm7609        | NM_001081746       | -4.21 | 1.83E-04 |
| Csprs         | NM_033616          | -4.24 | 1.59E-04 |
| Lgals12       | NM_019516          | -4.34 | 1.79E-05 |
| Msln          | NM_018857          | -4.45 | 6.53E-05 |
| Capn13        | NM_001033444       | -4.51 | 2.67E-05 |
| Ctse          | NM_007799          | -4.52 | 2.44E-04 |
| Ly6d          | NM_010742          | -4.54 | 8.95E-04 |
| Muc13         | NM_010739          | -4.54 | 1.49E-03 |
| 9530053A07Rik | NM_001164655       | -4.56 | 1.89E-02 |
| BC025446      | BC025446           | -4.79 | 1.28E-05 |
| Ckmt1         | ENSMUST00000078222 | -4.89 | 1.36E-06 |
| Muc1          | NM_013605          | -4.90 | 6.57E-04 |
| Ptges         | NM_022415          | -5.02 | 1.34E-06 |
| Fer114        | NM_001136556       | -5.17 | 4.12E-05 |

|          |                    |       |          |
|----------|--------------------|-------|----------|
| Abcg5    | ENSMUST00000066175 | -5.19 | 7.16E-04 |
| Ly6g     | XM_001475753       | -5.39 | 1.19E-02 |
| Cd200r2  | NM_206535          | -5.51 | 7.82E-08 |
| Best2    | NR_052011          | -5.65 | 4.28E-03 |
| Hepacam2 | NM_178899          | -5.68 | 1.12E-03 |

2.93E-05

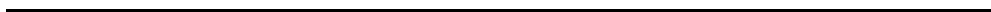

Supplement: mmc7.pdf [file mmc7.pdf]
