# Supplementary material for: Klf5 Deletion Promotes Pten Deletion–Initiated Luminal-Type Mouse Prostate Tumors through Multiple Oncogenic Signaling Pathways
Source: PubMed Central journal article supplement — Neoplasia. 2014 Nov 20;16(11):883–99. doi: 10.1016/j.neo.2014.09.006 (PMC4240924; doi:10.1016/j.neo.2014.09.006), 2014-11-20
Supplement: mmc6.pdf [file mmc6.pdf]

**Table S1.** Primer sequences used in this study.

| Gene name                                                | Forward primer/reverse primer (PCR product size in bp)                        |
|----------------------------------------------------------|-------------------------------------------------------------------------------|
| <i>Genotyping (W, wildtype allele; F, floxed allele)</i> |                                                                               |
| Klf5                                                     | 5'-ACAGATTTGAGGCAGTTTGGC-3'/5'-GGGCCAACTCCTAAGTGTTC-3' (283 for W, 349 for F) |
| Pten                                                     | 5'-ACTCAAGGCAGGGATGAGC-3'/5'-GCCCGATGCAATAAATATG-3' (987 for W, 1087 for F)   |
| Cre                                                      | 5'-CGGTCGATGCAACGAGTGAT-3'/5'-CCACCGTCAGTACGTGAGAT-3' (529)                   |
| Il-2                                                     | 5'-CTAGGCCACAGAATTGAAAGATCT-3'/5'-GTAGGTGGAAATTCTAGCATCATCC-3' (324)          |
| <i>Realtime RT-PCR</i>                                   |                                                                               |
| Klf5                                                     | 5'-ACTGCCCTCGGAGGAGCTGG-3'/5'-ATGCTCTGAAATTATCGGAACTG-3' (91)                 |
| Pten                                                     | 5'-GCCATCATCAAAGAGATCGTTAGCAG-3'/5'-CTCTGCAATTAATTTGGCGGTGTC-3' (247)         |
| Actin                                                    | 5'-CCACACCCGCCACCAGTTC-3'/5'-CCTTCTGACCCATTCCCACC-3' (173)                    |
| Gapdh                                                    | 5'-CCAGCCTCGTCCCGTAGACA-3'/5'-GCCGTTGAATTTGCCGTGAG-3' (190)                   |
| Cd24                                                     | 5'-GCAACCACAAGTCCAATGTG-3'/5'-TTTCACGCGTCTTTAATCC-3' (118)                    |
| Rab25                                                    | 5'-GATGGGGAATCGAACAGATG-3'/5'-GGGACAGCAGATTGGTCTTG-3' (92)                    |
| Sprr1a                                                   | 5'-CAGAGAACCTGCTCTTCTCTGAGT-3'/5'-TGAGGAGGTACAGTGCAGGG-3' (92)                |
| Sprr2a1                                                  | 5'-CTGCTCCGGAGAACCCTGAT-3'/5'-ACAAGGCTCAGGGCACTTC-3' (117)                    |
| Cdh2                                                     | 5'-AGAGGCCTATCCATGCTGAG-3'/5'-AGCAGCTTTAAGGCCCTCAT-3' (98)                    |
| Cdh5                                                     | 5'-TCATCAAACCCACGAAGTCC-3'/5'-GGTCTGTGGCCTCAATGTAGA-3' (72)                   |
| Gata2                                                    | 5'-GCAGAGAAGCAAGGCTCGC-3'/5'-CAGTTGACACACTCCCGGC-3' (51)                      |
| Sox2                                                     | 5'-CGAGATAAACATGGCAATCAAATG-3'/5'-AACGTTTGCCTTAAACAAGACCAC-3' (234)           |
| Ppargamma                                                | 5'-ACAGACAAGATTTGAAAGAAGCGGTGA-3'/5'-TCCGAAGTTGGTGGGCCAGA-3' (161)            |
| Hif3a                                                    | 5'-AGAGACCGGAGTGGTGCTGT-3'/5'-ATCAGCCGGAAGAGGACTTT-3' (301)                   |
| Aldh1a1                                                  | 5'-ACAAGGTGGCCTTCACTGGA-3'/5'-GCAAACACAATGCAAGGGCT-3' (121)                   |
| Aldh1a2                                                  | 5'-TGGGTGAGTTTGGCTTACGG-3'/5'-AGAAACGTGGCAGTCTTGGC-3' (121)                   |
| Cd80                                                     | 5'-GGCAAGGCAGCAATACCTTA-3'/5'-CTCTTTGTGCTGCTGATTCG-3' (94)                    |
| Upk2                                                     | 5'-GACAGCAGACCAGAGAGGCT-3'/5'-ACACTGCCTGTCCAGACCTT-3' (101)                   |
| Klf8                                                     | 5'-CAAGCCATTATGGTGCCTAC-3'/5'-ATAGAGCCCGGAGTGAGAAC-3' (77)                    |
| Cend2                                                    | 5'-AAGCCTGCCAGGAGCAA-3'/5'-ATCCGGCGTTATGCTGCTCT-3' (78)                       |
| Egf                                                      | 5'-TCTGGGTCAATCCGAGAGAT-3'/5'-TCGAGAGAAGCGAGAGAAGC-3' (91)                    |
| Krt23                                                    | 5'-TGTCATGAGCACGACAATG-3'/5'-CCCAGCCACAGAAAGGATTA-3' (109)                    |
| Hdac9                                                    | 5'-TCCTGGAGAAGCAGAAACAATA-3'/5'-GCTTCAGTTGTTCAATAGATTTTCG-3' (78)             |
| Mmp13                                                    | 5'-ATGGTCCAGGCGATGAAGACCCC-3'/5'-GTGCAGGCGCCAGAAGAATCTGT-3' (140)             |
| Elf3                                                     | 5'-GGCCCTCATGGCTGCCACCT-3'/5'-TTGGGATCTTGTCTGAGGTCCTGGA-3' (187)              |
| Dgat2                                                    | 5'-GATCGCAGTGGGTGCGAAAC-3'/5'-ATGCCATGGGGGTGGTATCC-3' (127)                   |
| Muc4                                                     | 5'-GAGGGCTACTGTCACAATGGAGGC-3'/5'-AGGGTCCGAAGAGGATCCCGTAG-3' (155)            |
| Muc1                                                     | 5'-CCCTACCTACCACACTCACGGACG-3'/5'-GTGGTCACCACAGCTGGGTTGGTA-3' (126)           |
| Krt7                                                     | 5'-CCATTCCGTCTCCAGACAAC-3'/5'-AGCTCCTGAACACCAAGCTG-3' (96)                    |
| Mmp12                                                    | 5'-TGGAATATGACCCCTGTTC-3'/5'-GCCTCTGAACCATGCACTTT-3' (304)                    |
| Spp1                                                     | 5'-AGCAAGAACTCTTCCAAGCAA-3'/5'-GTGAGATTCGTCAGATTCATCCG-3' (134)               |
| Tspan8                                                   | 5'-CTAGGAGCCGCTTTCAAACC-3'/5'-CAGCACTTGAACCTCCGACTGA-3' (143)                 |
| Lif4                                                     | 5'-ATGCAACATTTCTGCCTTC-3'/5'-AATCCAATCTCTGTGCCCTG-3' (132)                    |
| Muc20                                                    | 5'-AGTGACTCACGAGCCATCTG-3'/5'-ACCTCCACTTCAAGTACCG-3' (197)                    |
| Krt4                                                     | 5'-GATGAAGGACGCGAATTTGT-3'/5'-GAGCCTGCTGACACCTCTTC-3' (109)                   |
| PscA                                                     | 5'-GCTCACTGCAACCATGAAGA-3'/5'-GCTAAGTAGGTGGCCAGCAG-3' (54)                    |
| Muc19                                                    | 5'-TTTGTGACTGTCCATCACG-3'/5'-AATGGTCAGACGGGATCGT-3' (101)                     |
| KLF5*                                                    | 5'-AAGGAGTAACCCCGATTTGG-3'/5'-CAGCCTTCCCAGGTACTCTT-3' (147)                   |
| EGF*                                                     | 5'-CAACCAGTGGCTGGTGAGGA-3'/5'-GAGCCCTTACTACTGGATACTGGAA-3' (158)              |
| GAPDH*                                                   | 5'-GTGGTCCAGGGTCTTACTC-3'/5'-TTCAACAGCGACACCCACTC-3' (167)                    |

Note: \* indicates a human gene.
