# Supplementary material for: Klf5 Deletion Promotes Pten Deletion–Initiated Luminal-Type Mouse Prostate Tumors through Multiple Oncogenic Signaling Pathways
Source: PubMed Central journal article supplement — Neoplasia. 2014 Nov 20;16(11):883–99. doi: 10.1016/j.neo.2014.09.006 (PMC4240924; doi:10.1016/j.neo.2014.09.006), 2014-11-20
Supplement: mmc8.pdf [file mmc8.pdf]

**Table S3.** Genes upregulated or downregulated by *Klf5* deletion in more than one type of tissue. Upregulation in a tissue is indicated by "Up" or a positive fold change number, while downregulation is indicated by "Down" or a negative fold change number. Data for cornea, villus and bladder were from published studies (Ref. 41, 35 and 33).

| Gene symbol | RefSeq             | <i>Pten</i> -null<br>Prostate | Cornea | Villus | Bladder |
|-------------|--------------------|-------------------------------|--------|--------|---------|
| Tgm1        | NM_001161715       | -1.77                         | Up     |        | Up      |
| Sprr1a      | NM_009264          | -1.57                         | Up     | Down   | Down    |
| Reep6       | NM_139292          | -2.26                         | Down   | Down   | Down    |
| Dgat2       | NM_026384          | -3.37                         | Down   | Down   | Down    |
| Snx31       | NM_025712          | -1.58                         | Down   |        | Down    |
| Upk1b       | NM_178924          | -2.58                         | Down   |        | Down    |
| Gipc2       | NM_016867          | -1.55                         |        | Down   | Down    |
| Mboat1      | NM_153546          | -1.57                         |        | Down   | Down    |
| AA986860    | NM_177604          | -1.57                         |        | Down   | Down    |
| Pof1b       | NM_181579          | -1.68                         |        | Down   | Down    |
| Ppl         | NM_008909          | -1.72                         |        | Down   | Down    |
| Mgat4a      | ENSMUST00000042161 | -1.74                         |        | Down   | Down    |
| Tjp3        | NM_013769          | -1.76                         |        | Down   | Down    |
| Degs2       | NM_027299          | -1.77                         |        | Down   | Down    |
| S100a6      | NM_011313          | -1.85                         |        | Down   | Down    |
| Camk1d      | NM_177343          | -1.95                         |        | Down   | Down    |
| Tacstd2     | NM_020047          | -2.09                         |        | Down   | Down    |
| Pparg       | NM_001127330       | -2.32                         |        | Down   | Down    |
| Sh2d4a      | NM_028182          | -2.46                         |        | Down   | Down    |
| Lass3       | NM_001164201       | -2.64                         |        | Down   | Down    |
| Elf3        | NM_001163131       | -3.24                         |        | Down   | Down    |
| Acsm3       | NM_016870          | -3.46                         |        | Down   | Down    |
| Plip        | NM_026385          | -3.68                         |        | Down   | Down    |
| Tspan8      | NM_146010          | -9.67                         |        | Down   | Down    |
| Spink5      | NM_001081180       | 4.58                          | Up     |        |         |
| Cpn1        | NM_030703          | 4.08                          | Up     |        |         |
| Hdac9       | NM_024124          | 3.03                          | Up     |        |         |
| Arg1        | NM_007482          | 2.72                          | Up     |        |         |
| Arg2        | NM_009705          | 2.44                          | Up     |        |         |
| Ppbb        | NM_023785          | 2.34                          | Up     |        |         |
| Steap1      | NM_027399          | 2.19                          | Up     |        |         |
| Cntnap2     | NM_001004357       | 2.08                          | Up     |        |         |
| Olr1        | NM_138648          | 1.96                          | Up     |        |         |
| Steap4      | ENSMUST00000115421 | 1.95                          | Up     |        |         |
| Kcnn4       | NM_008433          | 1.95                          | Up     |        |         |

|          |                    |       |    |
|----------|--------------------|-------|----|
| Adamts4  | ENSMUST00000006570 | 1.81  | Up |
| Pilra    | NM_153510          | 1.81  | Up |
| Mmp8     | NM_008611          | 1.78  | Up |
| Grb14    | NM_016719          | 1.74  | Up |
| Trem3    | NM_021407          | 1.73  | Up |
| Slco2a1  | NM_033314          | 1.63  | Up |
| Igsf6    | NM_030691          | 1.63  | Up |
| Hdc      | NM_008230          | 1.62  | Up |
| Pgf      | NM_008827          | 1.62  | Up |
| Ccl2     | NM_011333          | 1.51  | Up |
| Tlr13    | NM_205820          | 1.51  | Up |
| Csf2rb   | NM_007780          | -1.50 | Up |
| Lgals3bp | NM_011150          | -1.50 | Up |
| Stard5   | NM_023377          | -1.52 | Up |
| Tnfaip2  | NM_009396          | -1.52 | Up |
| Pcbp3    | NM_021568          | -1.52 | Up |
| Lmo1     | NM_057173          | -1.53 | Up |
| Kctd14   | NM_001012434       | -1.53 | Up |
| Irx1     | NM_010573          | -1.53 | Up |
| Socs2    | NM_007706          | -1.54 | Up |
| Ms4a7    | ENSMUST00000025574 | -1.54 | Up |
| Csf3r    | NM_007782          | -1.55 | Up |
| Mbp      | NM_010777          | -1.55 | Up |
| Anxa3    | NM_013470          | -1.55 | Up |
| Irs1     | NM_010570          | -1.55 | Up |
| Adamts13 | NM_001190374       | -1.55 | Up |
| Slc11a1  | NM_013612          | -1.57 | Up |
| Fcgr4    | NM_144559          | -1.57 | Up |
| Pdgfb    | NM_011057          | -1.57 | Up |
| Mfap5    | NM_015776          | -1.59 | Up |
| Eya2     | ENSMUST00000063433 | -1.59 | Up |
| Adamts9  | NM_175314          | -1.59 | Up |
| Fam167a  | NM_177628          | -1.60 | Up |
| S100a8   | NM_013650          | -1.60 | Up |
| Sdcbp2   | NM_145535          | -1.61 | Up |
| Hmcn1    | NM_001024720       | -1.62 | Up |
| Glis3    | NM_175459          | -1.62 | Up |
| Ctsk     | NM_007802          | -1.62 | Up |
| Hmcn1    | NM_001024720       | -1.62 | Up |
| Fblim1   | ENSMUST00000006381 | -1.62 | Up |
| Cp       | NM_001042611       | -1.63 | Up |
| Pmaip1   | NM_021451          | -1.63 | Up |
| Mt1      | NM_013602          | -1.64 | Up |

|           |                    |       |    |
|-----------|--------------------|-------|----|
| Cd300ld   | NM_145437          | -1.64 | Up |
| Ap1s2     | NM_026887          | -1.64 | Up |
| Sftpd     | NM_009160          | -1.64 | Up |
| Itgax     | NM_021334          | -1.65 | Up |
| Synm      | NM_201639          | -1.65 | Up |
| Cxcl1     | NM_008176          | -1.65 | Up |
| Chst11    | NM_021439          | -1.65 | Up |
| Lyz2      | NM_017372          | -1.65 | Up |
| Rad5111   | NM_009014          | -1.65 | Up |
| Clic6     | NM_172469          | -1.66 | Up |
| Sulf2     | ENSMUST00000109249 | -1.66 | Up |
| Cntn1     | NM_007727          | -1.66 | Up |
| Noxo1     | NM_027988          | -1.68 | Up |
| Ctsz      | NM_022325          | -1.69 | Up |
| Adm       | NM_009627          | -1.70 | Up |
| Gpx3      | NM_008161          | -1.70 | Up |
| Il1b      | NM_008361          | -1.71 | Up |
| Flt1      | NM_010228          | -1.74 | Up |
| Xdh       | NM_011723          | -1.74 | Up |
| Clec7a    | NM_020008          | -1.74 | Up |
| Timp1     | NM_001044384       | -1.75 | Up |
| Smoc2     | NM_022315          | -1.78 | Up |
| Crym      | NM_016669          | -1.78 | Up |
| Soat1     | NM_009230          | -1.79 | Up |
| Ppp2r2b   | NM_028392          | -1.80 | Up |
| Vcam1     | NM_011693          | -1.82 | Up |
| Apol7a    | NM_029419          | -1.83 | Up |
| Lox       | NM_010728          | -1.83 | Up |
| Selp      | NM_011347          | -1.84 | Up |
| Crabp2    | NM_007759          | -1.84 | Up |
| Trem1     | NM_021406          | -1.85 | Up |
| Thbs2     | NM_011581          | -1.87 | Up |
| Gzmb      | NM_013542          | -1.87 | Up |
| Kcne4     | NM_021342          | -1.88 | Up |
| Serpina3n | NM_009252          | -1.88 | Up |
| Retnla    | NM_020509          | -1.89 | Up |
| Clec4d    | NM_010819          | -1.90 | Up |
| Fam132a   | NM_026125          | -1.90 | Up |
| Gjal      | NM_010288          | -1.91 | Up |
| St3gal4   | NM_009178          | -1.93 | Up |
| Il1a      | NM_010554          | -1.93 | Up |
| Qsox1     | NM_001024945       | -1.95 | Up |
| Casp1     | ENSMUST00000027015 | -2.01 | Up |

|         |                    |       |    |
|---------|--------------------|-------|----|
| Cd14    | NM_009841          | -2.02 | Up |
| Fbn1    | ENSMUST00000103234 | -2.08 | Up |
| Filip11 | NM_001040397       | -2.09 | Up |
| Tnc     | NM_011607          | -2.09 | Up |
| Slc6a2  | NM_009209          | -2.10 | Up |
| Gabrp   | NM_146017          | -2.10 | Up |
| Pla1a   | NM_134102          | -2.11 | Up |
| Tnfsf10 | NM_009425          | -2.12 | Up |
| Clec4e  | NM_019948          | -2.14 | Up |
| Clec4n  | NM_020001          | -2.14 | Up |
| Adra2a  | NM_007417          | -2.20 | Up |
| Trf     | NM_133977          | -2.23 | Up |
| Sestd1  | NM_175465          | -2.30 | Up |
| Tspan2  | ENSMUST00000029451 | -2.32 | Up |
| Adam28  | NM_010082          | -2.42 | Up |
| Rgs5    | ENSMUST00000027997 | -2.46 | Up |
| S1pr3   | NM_010101          | -2.49 | Up |
| Spon1   | NM_145584          | -2.49 | Up |
| Slc26a4 | NM_011867          | -2.56 | Up |
| Krt23   | NM_033373          | -2.60 | Up |
| Angptl2 | NM_011923          | -2.61 | Up |
| Fam55d  | ENSMUST00000093853 | -2.61 | Up |
| Ccnd2   | NM_009829          | -2.62 | Up |
| Reg3g   | NM_011260          | -2.63 | Up |
| Gprc5a  | NM_181444          | -2.67 | Up |
| Cyp2f2  | NM_007817          | -2.74 | Up |
| Plod2   | NM_001142916       | -2.74 | Up |
| Mcoln2  | NM_026656          | -2.99 | Up |
| Mecom   | ENSMUST00000108271 | -3.18 | Up |
| Mmp13   | ENSMUST00000015394 | -3.18 | Up |
| Mecom   | NM_021442          | -3.26 | Up |
| Chi3l1  | NM_007695          | -3.32 | Up |
| Clca2   | NM_030601          | -3.46 | Up |
| Gsdmc   | NM_031378          | -3.50 | Up |
| Adh6a   | NM_026945          | -3.98 | Up |
| Atp2a3  | NM_016745          | -4.10 | Up |
| Spp1    | NM_001204233       | -4.22 | Up |
| Ctse    | NM_007799          | -4.52 | Up |
| Mmp12   | NM_008605          | -4.96 | Up |
| Ptges   | NM_022415          | -5.02 | Up |
| Ttr     | NM_013697          | -5.05 | Up |
| Ltf     | NM_008522          | -5.80 | Up |
| Aspa    | NM_023113          | -6.20 | Up |

|          |                    |        |      |
|----------|--------------------|--------|------|
| Cadps    | NM_012061          | -6.69  | Up   |
| Slco1a5  | NM_001267707       | -6.90  | Up   |
| Ptprz1   | ENSMUST00000090568 | -8.35  | Up   |
| Gp2      | NM_025989          | -10.19 | Up   |
| Psca     | NM_028216          | -19.63 | Up   |
| Olfm4    | NM_001030294       | -19.63 | Up   |
| Ppp1r3c  | ENSMUST00000087321 | 4.07   | Down |
| Rasl11b  | NM_026878          | 3.09   | Down |
| Egf      | NM_010113          | 2.97   | Down |
| Papss2   | NM_011864          | 2.64   | Down |
| Aldh1a1  | NM_013467          | 2.32   | Down |
| Stc2     | NM_011491          | 2.17   | Down |
| Ednrb    | NM_007904          | 2.15   | Down |
| Fah      | NM_010176          | 2.15   | Down |
| Bok      | NM_016778          | 1.96   | Down |
| Aldh6a1  | NM_134042          | 1.94   | Down |
| Ttc7b    | NM_001033213       | 1.86   | Down |
| Sfrp1    | NM_013834          | 1.85   | Down |
| Slc16a12 | NM_172838          | 1.84   | Down |
| Prom2    | ENSMUST00000028855 | 1.77   | Down |
| Pm20d1   | NM_178079          | 1.70   | Down |
| Slc19a2  | NM_054087          | 1.70   | Down |
| Trpm3    | ENSMUST00000112704 | 1.62   | Down |
| Cd40     | NR_027852          | 1.61   | Down |
| Crlf1    | NM_018827          | 1.60   | Down |
| Rasgrf1  | NM_011245          | 1.59   | Down |
| Fabp6    | ENSMUST00000020672 | -1.54  | Down |
| Hmgcs1   | NM_145942          | -1.58  | Down |
| Acs11    | NM_007981          | -1.58  | Down |
| Slc25a10 | NM_013770          | -1.58  | Down |
| Krt78    | NM_212487          | -1.61  | Down |
| Myh14    | NM_028021          | -1.63  | Down |
| Rassf7   | NM_025886          | -1.67  | Down |
| Clic3    | NM_027085          | -1.68  | Down |
| Npy2r    | NM_008731          | -1.68  | Down |
| Ppfibp2  | NM_008905          | -1.73  | Down |
| Ndn      | NM_010882          | -1.74  | Down |
| Cdo1     | NM_033037          | -1.77  | Down |
| F3       | NM_010171          | -1.90  | Down |
| Lynx1    | NM_011838          | -1.94  | Down |
| Glde     | NM_138595          | -1.99  | Down |
| Omp      | NM_011010          | -2.00  | Down |
| Tst      | NM_009437          | -2.01  | Down |

|          |              |       |      |
|----------|--------------|-------|------|
| Homer2   | NM_011983    | -2.03 | Down |
| Klf5     | NM_009769    | -2.11 | Down |
| Clip4    | NM_030179    | -2.14 | Down |
| Sema3c   | NM_013657    | -2.15 | Down |
| Nrxn1    | NM_020252    | -2.19 | Down |
| Lrrc26   | NM_146117    | -2.19 | Down |
| Ano9     | NM_178381    | -2.19 | Down |
| Rapgef11 | NM_001080925 | -2.19 | Down |
| Galnt4   | NM_015737    | -2.29 | Down |
| Cmb1     | NM_181588    | -2.32 | Down |
| Sh3gl2   | NM_019535    | -2.46 | Down |
| Npnt     | NM_033525    | -2.50 | Down |
| Gsta3    | NM_001077353 | -2.89 | Down |
| Mgat3    | NM_010795    | -3.42 | Down |
| Ripply3  | NM_133229    | -3.48 | Down |

Down

---
