# Supplementary material for: Klf5 Deletion Promotes Pten Deletion–Initiated Luminal-Type Mouse Prostate Tumors through Multiple Oncogenic Signaling Pathways
Source: PubMed Central journal article supplement — Neoplasia. 2014 Nov 20;16(11):883–99. doi: 10.1016/j.neo.2014.09.006 (PMC4240924; doi:10.1016/j.neo.2014.09.006), 2014-11-20
Supplement: mmc9.pdf [file mmc9.pdf]

**Table S4.** Genes dysregulated by both *Klf5* deletion in *Pten*-null mouse prostates and ectopic expression of KLF5 or its acetylation-deficient mutant K369R in xenograft tumors of the DU 145 human prostate cancer cell line (DU 145-KLF5 or DU 145-K369R). Data for DU 145 xenografts were from a previous study (Ref. 24).

| Gene symbol | RefSeq             | Fold-Change                    |             |              |
|-------------|--------------------|--------------------------------|-------------|--------------|
|             |                    | Prostate with<br>Klf5 deletion | DU 145-KLF5 | DU 145-K369R |
| A2m         | ENSMUST00000032203 | 4.15                           | -2.31       | -8.19        |
| Coro6       | ENSMUST00000102493 | 2.71                           |             | -2.61        |
| Pycr1       | NM_144795          | 2.47                           |             | -1.53        |
| Phlda2      | NM_009434          | 2.44                           |             | 1.58         |
| Aldh1a1     | NM_013467          | 2.32                           |             | -13.70       |
| Tnc         | NM_011607          | 2.09                           |             | 3.06         |
| Hc          | NM_010406          | 1.93                           |             | -6.63        |
| Serpina1a   | NM_001252569       | 1.92                           |             | 3.23         |
| Gja1        | NM_010288          | 1.91                           |             | -3.16        |
| Crabp2      | NM_007759          | 1.84                           | 1.85        |              |
| Hilpda      | NM_023516          | 1.81                           |             | -2.09        |
| Adm         | NM_009627          | 1.70                           |             | -2.25        |
| Pfkfb3      | NM_001177753       | 1.69                           | 1.64        |              |
| Gstt1       | NM_008185          | 1.68                           |             | -1.66        |
| Col4a2      | ENSMUST00000033899 | 1.67                           |             | 4.19         |
| Pcsk6       | NM_011048          | 1.65                           |             | -2.38        |
| Mdk         | NM_010784          | 1.64                           | 1.56        |              |
| Slc39a14    | NM_001135151       | 1.63                           |             | 1.59         |
| Tuba4a      | NM_009447          | 1.62                           |             | 2.06         |
| Cdh3        | NM_001037809       | 1.61                           |             | 1.62         |
| S100a8      | NM_013650          | 1.60                           | -3.34       | -3.37        |
| Crlf1       | NM_018827          | 1.60                           |             | -5.52        |
| Susd2       | NM_027890          | 1.58                           |             | -4.68        |
| Fkbp10      | NM_010221          | 1.58                           |             | -2.60        |
| Ndrp1       | NM_008681          | 1.56                           |             | -1.63        |
| Cpm         | NM_027468          | 1.56                           |             | -2.60        |
| Col4a1      | NM_009931          | 1.55                           |             | 2.81         |
| Tfpi2       | NM_009364          | 1.53                           |             | -2.79        |
| Tnfaip2     | NM_009396          | 1.52                           |             | 1.94         |
| Phgdh       | NM_016966          | 1.52                           |             | -1.59        |
| Gramd1b     | ENSMUST00000165104 | -1.50                          |             | 1.55         |
| Lpgat1      | NM_001134829       | -1.51                          |             | -2.55        |
| Tmtc2       | NM_177368          | -1.51                          |             | -6.44        |
| Gpx2        | NM_030677          | -1.52                          |             | -2.10        |
| Idh2        | NM_173011          | -1.54                          |             | -2.05        |

|          |                    |       |      |        |
|----------|--------------------|-------|------|--------|
| Anxa3    | NM_013470          | -1.55 |      | 2.42   |
| Pdlim2   | NM_145978          | -1.55 |      | 1.64   |
| Arrb1    | NM_177231          | -1.55 | 1.95 |        |
| Cadm1    | NM_207675          | -1.57 |      | -2.30  |
| Il18     | NM_008360          | -1.61 |      | 2.15   |
| Pag1     | NM_001195031       | -1.62 |      | -5.06  |
| Pmaip1   | NM_021451          | -1.63 |      | 1.60   |
| Syt12    | ENSMUST00000032846 | -1.65 |      | 2.52   |
| Cfi      | NM_007686          | -1.70 |      | -3.29  |
| Crispld1 | ENSMUST00000095075 | -1.78 |      | -10.13 |
| Efemp1   | NM_146015          | -1.85 |      | 4.51   |
| S100a6   | NM_011313          | -1.85 |      | 2.45   |
| Agr2     | NM_011783          | -1.87 |      | -5.00  |
| Mall     | NM_145532          | -1.90 |      | -1.69  |
| F3       | NM_010171          | -1.90 |      | -3.07  |
| Abca8a   | NM_153145          | -1.93 |      | -3.48  |
| Abca8b   | NM_013851          | -2.03 |      | -3.48  |
| Tacstd2  | NM_020047          | -2.09 |      | 14.15  |
| Sema3c   | NM_013657          | -2.15 |      | 2.15   |
| Npnt     | NM_033525          | -2.50 |      | -9.47  |
| Chga     | NM_007693          | -2.64 | 2.75 | -6.38  |
| Ctse     | NM_007799          | -4.52 |      | -3.02  |
| Tspan8   | NM_146010          | -9.67 |      | -6.97  |

---
