# Supplementary material for: Klf5 Deletion Promotes Pten Deletion–Initiated Luminal-Type Mouse Prostate Tumors through Multiple Oncogenic Signaling Pathways
Source: PubMed Central journal article supplement — Neoplasia. 2014 Nov 20;16(11):883–99. doi: 10.1016/j.neo.2014.09.006 (PMC4240924; doi:10.1016/j.neo.2014.09.006), 2014-11-20
Supplement: mmc10.pdf [file mmc10.pdf]

**Table S5.** Differentially expressed genes that were prostate cancer-related, as identified by the MetaCore program, and had appeared in at least one PubMed publication on prostate cancer. Fold change between *Klf5* -wildtype and *Klf5* -null groups and the number of PubMed publications available are also shown for each of the genes. Positive (P) or negative (N) refers to a gene's association with the development or progression of prostate cancer based on PubMed publications, with P indicating a gene's promoting role in prostate tumorigenesis or upregulation in prostate tumors and N indicating the opposite. N/A, information is not clear.

| Gene symbol   | RefSeq             | Fold change | Publications in PubMed | Association with prostate cancer |
|---------------|--------------------|-------------|------------------------|----------------------------------|
| Cbs           | NM_144855          | 5.21        | 6                      | P                                |
| Mmp12         | NM_008605          | 4.96        | 5                      | P                                |
| Spp1          | NM_001204233       | 4.22        | 38                     | P                                |
| A2m           | ENSMUST00000032203 | 4.15        | 9                      | P                                |
| ErbB4         | NM_010154          | 3.88        | 24                     | P                                |
| Fabp5         | NM_010634          | 3.67        | 7                      | P                                |
| Chi311        | NM_007695          | 3.32        | 6                      | P                                |
| Mmp13         | ENSMUST00000015394 | 3.18        | 16                     | P                                |
| Slc1a2        | NM_001077514       | 3.01        | 1                      | P                                |
| Egf           | NM_010113          | 2.97        | 687                    | P                                |
| Aldh1a2       | NM_009022          | 2.93        | 3                      | P                                |
| Azgp1         | NM_013478          | 2.81        | 13                     | P                                |
| Arg1          | NM_007482          | 2.72        | 5                      | P                                |
| Ccnd2         | NM_009829          | 2.62        | 22                     | P                                |
| Cyp7b1        | NM_007825          | 2.56        | 9                      | P                                |
| Sema3a        | ENSMUST00000030714 | 2.48        | 6                      | P                                |
| P5CR1         | NM_144795          | 2.47        | 2                      | P                                |
| Arg2          | NM_009705          | 2.44        | 6                      | P                                |
| Htr2b         | NM_008311          | 2.40        | 2                      | P                                |
| Aldh1a1       | NM_013467          | 2.32        | 10                     | P                                |
| Bmpr1b        | NM_007560          | 2.30        | 5                      | P                                |
| Steap1        | NM_027399          | 2.19        | 34                     | P                                |
| Stc2          | NM_011491          | 2.17        | 1                      | P                                |
| Msr1          | NM_031195          | 2.12        | 43                     | P                                |
| Tnc           | NM_011607          | 2.09        | 4                      | P                                |
| Mme           | NM_008604          | 2.08        | 6                      | P                                |
| Il1a          | NM_010554          | 1.93        | 2                      | P                                |
| Eif4ebp1      | NM_007918          | 1.91        | 18                     | P                                |
| Bmp7          | NM_007557          | 1.88        | 35                     | P                                |
| Vcam1         | NM_011693          | 1.82        | 2                      | P                                |
| Cad           | NM_023525          | 1.82        | 111                    | P                                |
| Pdgfd         | NM_027924          | 1.82        | 11                     | P                                |
| PDGF receptor | NM_001146268       | 1.81        | 58                     | P                                |
| Mrc2          | NM_008626          | 1.79        | 2                      | P                                |
| Fmo4          | NM_144878          | 1.79        | 1                      | P                                |
| Mmp8          | NM_008611          | 1.78        | 1                      | P                                |

|         |                    |       |    |   |
|---------|--------------------|-------|----|---|
| Col1a1  | NM_007742          | 1.77  | 9  | P |
| Cdh5    | NM_009868          | 1.75  | 1  | P |
| Tcf7l1  | NM_001079822       | 1.74  | 1  | P |
| Flt1    | NM_010228          | 1.74  | 11 | P |
| Aqp1    | NM_007472          | 1.73  | 9  | P |
| Slc16a4 | NM_146136          | 1.72  | 4  | P |
| Cxcr2   | NM_009909          | 1.72  | 19 | P |
| Il1b    | NM_008361          | 1.71  | 7  | P |
| Adm     | NM_009627          | 1.70  | 19 | P |
| Rcn1    | NM_009037          | 1.69  | 1  | P |
| Ctsz    | NM_022325          | 1.69  | 1  | P |
| Gstt1   | NM_008185          | 1.68  | 67 | P |
| Angpt2  | NM_007426          | 1.66  | 18 | P |
| Pcsk6   | NM_011048          | 1.65  | 2  | P |
| Mdk     | NM_010784          | 1.64  | 4  | P |
| Mat2a   | NM_145569          | 1.63  | 2  | P |
| Ctnnd2  | NM_008729          | 1.63  | 3  | P |
| Ctsk    | NM_007802          | 1.62  | 13 | P |
| Cdh3    | NM_001037809       | 1.61  | 1  | P |
| S100a8  | NM_013650          | 1.60  | 15 | P |
| Fkbp10  | NM_010221          | 1.58  | 1  | P |
| Pdgfb   | NM_011057          | 1.57  | 27 | P |
| Chka    | NM_013490          | 1.56  | 3  | P |
| Sdc2    | NM_008304          | 1.55  | 3  | P |
| Irs1    | NM_010570          | 1.55  | 29 | P |
| Nrp1    | NM_008737          | 1.55  | 12 | P |
| Adarb1  | NR_004429          | 1.55  | 3  | P |
| Csf3r   | NM_007782          | 1.55  | 19 | P |
| Bnip3   | NM_009760          | 1.54  | 9  | P |
| Tek     | NM_013690          | 1.53  | 6  | P |
| Ccl2    | NM_011333          | 1.51  | 76 | P |
| Mt2     | NM_008630          | 1.51  | 9  | P |
| Igfbp5  | NM_010518          | 1.50  | 30 | P |
| Ghr     | NM_010284          | 1.50  | 17 | P |
| Stard3  | NM_021547          | -1.50 | 2  | P |
| Pde2a   | NM_001143848       | -1.52 | 1  | P |
| Sema3f  | NM_011349          | -1.52 | 1  | P |
| Prkcz   | NM_008860          | -1.54 | 2  | P |
| Aldh1a3 | NM_053080          | -1.54 | 2  | P |
| Wnt5a   | NM_009524          | -1.59 | 26 | P |
| Ptprn2  | NM_011215          | -1.61 | 1  | P |
| Nr2f2   | NM_009697          | -1.61 | 6  | P |
| Per3    | NM_011067          | -1.62 | 3  | P |
| Pag1    | NM_001195031       | -1.62 | 2  | P |
| Cant1   | ENSMUST00000017620 | -1.69 | 3  | P |

|         |                    |        |     |   |
|---------|--------------------|--------|-----|---|
| Cdh2    | NM_007664          | -1.69  | 13  | P |
| Rab3b   | NM_023537          | -1.70  | 1   | P |
| Bcl2    | NM_009741          | -1.71  | 144 | P |
| Map3k5  | NM_008580          | -1.75  | 7   | P |
| Peg10   | NM_130877          | -1.78  | 1   | P |
| Crym    | NM_016669          | -1.78  | 2   | P |
| Ick     | NM_019987          | -1.81  | 2   | P |
| Epha4   | NM_007936          | -1.87  | 5   | P |
| Agr2    | NM_011783          | -1.87  | 27  | P |
| Gata2   | NM_008090          | -1.90  | 10  | P |
| Hmgcs2  | NM_008256          | -1.95  | 1   | P |
| Fzd3    | NM_021458          | -1.96  | 3   | P |
| Lepr    | NM_001122899       | -1.98  | 5   | P |
| Gsn     | NM_001206367       | -2.00  | 1   | P |
| Tmprss2 | NM_015775          | -2.09  | 459 | P |
| Ret     | NM_001080780       | -2.39  | 31  | P |
| L1cam   | NM_008478          | -2.47  | 5   | P |
| Sult1e1 | NM_023135          | -2.70  | 2   | P |
| Tmprss4 | NM_145403          | -2.72  | 2   | P |
| Styk1   | NM_172891          | -2.94  | 2   | P |
| Insrr   | NM_011832          | -3.52  | 6   | P |
| Tff3    | NM_011575          | -18.51 | 13  | P |
| Psca    | NM_028216          | -19.63 | 208 | P |
| Nkx3-1  | NM_010921          | 2.57   | 229 | N |
| Ednrb   | NM_007904          | 2.15   | 17  | N |
| Sstr2   | NM_009217          | 2.10   | 16  | N |
| Fbn1    | ENSMUST00000103234 | 2.08   | 2   | N |
| Ccbe1   | NM_178793          | 2.07   | 1   | N |
| Hey1    | NM_010423          | 2.00   | 6   | N |
| Steap4  | Steap4             | 1.95   | 31  | N |
| Gjal    | NM_010288          | 1.91   | 5   | N |
| Thbs2   | NM_011581          | 1.87   | 1   | N |
| Crabp2  | NM_007759          | 1.84   | 2   | N |
| Lox     | NM_010728          | 1.83   | 14  | N |
| Hoxb13  | ENSMUST0000006270  | 1.79   | 62  | N |
| Bambi   | NM_026505          | 1.78   | 3   | N |
| Timp1   | NM_001044384       | 1.75   | 17  | N |
| Col1a2  | NM_007743          | 1.73   | 2   | N |
| Slc5a8  | NM_145423          | 1.72   | 3   | N |
| Lrrc3b  | NM_146052          | 1.70   | 1   | N |
| Gpx3    | NM_008161          | 1.70   | 12  | N |
| Spry2   | NM_011897          | 1.66   | 11  | N |
| Mt1     | NM_013602          | 1.64   | 58  | N |
| Cd40    | NR_027852          | 1.61   | 34  | N |
| Glipr1  | NM_028608          | 1.61   | 20  | N |

|         |                    |       |     |   |
|---------|--------------------|-------|-----|---|
| Adamts9 | NM_175314          | 1.59  | 1   | N |
| Ndrp1   | NM_008681          | 1.56  | 33  | N |
| Aox1    | NM_009676          | 1.56  | 3   | N |
| Col4a1  | NM_009931          | 1.55  | 2   | N |
| Dpysl3  | NM_009468          | 1.55  | 1   | N |
| Hhex    | NM_008245          | 1.55  | 2   | N |
| Socs2   | NM_007706          | 1.54  | 6   | N |
| Eng     | NM_001146350       | 1.50  | 34  | N |
| Fbln5   | NM_011812          | 1.50  | 1   | N |
| Hpn     | NM_001110252       | -1.53 | 12  | N |
| Unc5b   | NM_029770          | -1.53 | 1   | N |
| Mbp     | NM_010777          | -1.55 | 28  | N |
| Anxa3   | NM_013470          | -1.55 | 10  | N |
| Cadm1   | NM_207675          | -1.57 | 4   | N |
| Cdkn2c  | NM_007671          | -1.58 | 7   | N |
| Il18    | NM_008360          | -1.61 | 19  | N |
| Pmaip1  | NM_021451          | -1.63 | 6   | N |
| Idh1    | NM_010497          | -1.67 | 7   | N |
| Klf10   | NM_013692          | -1.68 | 4   | N |
| Lzts1   | ENSMUST00000034630 | -1.72 | 9   | N |
| Trim36  | NM_178872          | -1.73 | 1   | N |
| Ascl1   | NM_008553          | -1.82 | 11  | N |
| Efemp1  | NM_146015          | -1.85 | 1   | N |
| Meis2   | NM_001136072       | -1.85 | 1   | N |
| S100a6  | NM_011313          | -1.85 | 3   | N |
| Has3    | NM_008217          | -1.85 | 9   | N |
| Socs6   | NM_018821          | -1.86 | 3   | N |
| Zfp185  | NM_009549          | -1.92 | 1   | N |
| Syp     | NM_009305          | -1.92 | 6   | N |
| Casp1   | Casp1              | -2.01 | 32  | N |
| Cd14    | NM_009841          | -2.02 | 39  | N |
| Wnt4    | NM_009523          | -2.03 | 5   | N |
| Klf5    | NM_009769          | -2.11 | 13  | N |
| Tnfsf10 | NM_009425          | -2.12 | 306 | N |
| Mal     | NM_010762          | -2.15 | 23  | N |
| Pparg   | NM_001127330       | -2.32 | 121 | N |
| Chga    | NM_007693          | -2.64 | 53  | N |
| Hpse    | NM_152803          | -2.95 | 6   | N |
| Fgfr3   | NM_008010          | -3.22 | 26  | N |
| Elf3    | NM_001163131       | -3.24 | 11  | N |
| Mecom   | NM_021442          | -3.26 | 2   | N |
| Muc4    | NM_080457          | -3.43 | 9   | N |
| Ctse    | NM_007799          | -4.52 | 1   | N |
| Muc1    | NM_013605          | -4.90 | 87  | N |
| Ltf     | NM_008522          | -5.80 | 4   | N |

|          |                    |       |    |     |
|----------|--------------------|-------|----|-----|
| Wfdc2    | NM_026323          | -5.87 | 4  | N   |
| Abo      | NM_030718          | 5.36  | 1  | N/A |
| Slc26a4  | NM_011867          | 2.56  | 1  | N/A |
| Col3a1   | NM_009930          | 1.69  | 2  | N/A |
| Egr2     | NM_010118          | 1.67  | 3  | N/A |
| Itgax    | NM_021334          | 1.65  | 9  | N/A |
| Fbn2     | NM_010181          | 1.62  | 1  | N/A |
| Map2     | NM_001039934       | 1.58  | 1  | N/A |
| Alb      | NM_009654          | 1.50  | 7  | N/A |
| Pik3c2b  | NM_001099276       | -1.51 | 2  | N/A |
| Pclo     | NM_011995          | -1.52 | 2  | N/A |
| Khdrbs3  | NM_010158          | -1.53 | 1  | N/A |
| Hsd17b11 | NM_053262          | -1.54 | 2  | N/A |
| Bcas1    | NM_029815          | -1.54 | 3  | N/A |
| Sulf2    | ENSMUST00000109249 | -1.66 | 2  | N/A |
| Cntn1    | NM_007727          | -1.66 | 1  | N/A |
| Nans     | NM_053179          | -1.70 | 1  | N/A |
| Ppl      | NM_008909          | -1.72 | 1  | N/A |
| Crispld1 | ENSMUST00000095075 | -1.78 | 1  | N/A |
| Kcnh2    | NM_013569          | -1.84 | 1  | N/A |
| Syt9     | NM_021889          | -1.87 | 1  | N/A |
| F3       | NM_010171          | -1.90 | 19 | N/A |
| Ppargc1b | NM_133249          | -2.09 | 1  | N/A |
| Adra2a   | NM_007417          | -2.20 | 8  | N/A |
| Pde8b    | NM_172263          | -2.62 | 1  | N/A |
| Gsto1    | NM_010362          | -2.89 | 2  | N/A |
| Kcnq1    | NM_008434          | -3.46 | 1  | N/A |
| Engase   | NM_172573          | -3.49 | 2  | N/A |
| Gpc3     | NM_016697          | -3.60 | 2  | N/A |
| Krt7     | NM_033073          | -4.06 | 12 | N/A |
| Gsdmd    | NM_026960          | -1.67 | 1  | N/A |
| Foxp2    | NM_053242          | -1.52 | 1  | N/A |

---
