# Supplementary material for: Klf5 Deletion Promotes Pten Deletion–Initiated Luminal-Type Mouse Prostate Tumors through Multiple Oncogenic Signaling Pathways
Source: PubMed Central journal article supplement — Neoplasia. 2014 Nov 20;16(11):883–99. doi: 10.1016/j.neo.2014.09.006 (PMC4240924; doi:10.1016/j.neo.2014.09.006), 2014-11-20
Supplement: mmc11.pdf [file mmc11.pdf]

**Table S6.** Functional processes enriched by MetaCore analysis based on the differentially expressed genes between *Klf5*-wildtype and *Klf5*-null mouse dorsal prostates. Different processes with the same function are grouped together and ranked based on *p*-values (from low to high, *p*-value <0.01). Genes contributing to a process are listed.

| Process                       | <i>p</i> -Value | Genes                                                                                                                                                                                                                                                                                                                                                                                                                                                                                                                                                                       | Number |
|-------------------------------|-----------------|-----------------------------------------------------------------------------------------------------------------------------------------------------------------------------------------------------------------------------------------------------------------------------------------------------------------------------------------------------------------------------------------------------------------------------------------------------------------------------------------------------------------------------------------------------------------------------|--------|
| <b><u>Development</u></b>     |                 |                                                                                                                                                                                                                                                                                                                                                                                                                                                                                                                                                                             |        |
| Blood vessel morphogenesis    | 1.57E-08        | IL-1 beta, HEY1, Galpha(i)-specific peptide GPCRs, Lactoferrin, Galpha(q)-specific nucleotide-like GPCRs, VEGFR-1, EGF, TIE2, TBX1, Ceruloplasmin, Galpha(i)-specific amine GPCRs, IL-1 alpha, ErbB4, Galpha(q)-specific peptide GPCRs, Angiopoietin 2, F263, Transferrin, PDE3A, LEKTI, PGAR, PLGF, GRB14, KLF5, MSG1, Endomucin, L1CAM, Galpha(q)-specific amine GPCRs, G-protein alpha-i family, FOXC1, Tissue kallikreins, Neuropilin-1, Galpha(i)-specific EDG GPCRs, Protein kinase G, Galpha(s)-specific nucleotide-like GPCRs, VCAM1, EDNRB, Adenosine A2b receptor | 37     |
| Regulation of angiogenesis    | 2.37E-04        | AGTR1, IL-1 beta, Endoglin, N-cadherin, Angiotensin III, COUP-TFII, IL-1 alpha, Galpha(i)-specific peptide GPCRs, VEGFR-1, TIE2, Galpha(q)-specific peptide GPCRs, EDNRB, HOXA3, PKC, Ephrin-A, LEKTI, IL-18, Leptin receptor, PGAR, Ephrin-A receptor 4, Angiomotin (AMOT), Ephrin-B2, G-protein alpha-i family, Connexin 43, IP3 receptor, IL8RB                                                                                                                                                                                                                          | 26     |
| Neurogenesis_ Axonal guidance | 4.01E-04        | Semaphorin 3C, UNC5B, N-cadherin, Semaphorin 6A, ADAM23, PCSK5, SPOCK2, Ephrin-A3, Calyculin, CRMP4, DARPP-32, Ephrin-A, FEZ1, Syntenin 2, Semaphorin 3A, Integrin, MyHC, Ephrin-A receptor 4, Ephrin-B2, L1CAM, PPAR-gamma, NEFH, Syndecan-2, Neuropilin-1, IP3 receptor, Semaphorin 3F, Guanine deaminase                                                                                                                                                                                                                                                                 | 27     |
| Neurogenesis in               | 6.18E-04        | FZD8, WNT4, HEY1, CHRM, Myelin basic                                                                                                                                                                                                                                                                                                                                                                                                                                                                                                                                        | 23     |

|                                             |          |                                                                                                                                                                                                                                                                                                       |    |
|---------------------------------------------|----------|-------------------------------------------------------------------------------------------------------------------------------------------------------------------------------------------------------------------------------------------------------------------------------------------------------|----|
| general                                     |          | protein, EGR2 (Krox20), VEGFR-1, WNT5A, Galpha(i)-specific amine GPCRs, EDNRB, HOXA2, hASH1, Midkine, Collagen IV, ATH1, RET, ACM2, WNT, G-protein alpha-i family, PTPR-zeta, Frizzled, G-protein alpha-o, Nectin                                                                                     |    |
| Neurogenesis_<br>Synaptogenesis             | 6.20E-03 | Neurologin 1, Homer, PEP-19, SYP, ErbB4, Synaptotagmin VIII, Endophilin A1, Synaptotagmin-IX, ADAR2, Piccolo, Ephrin-B2, WNT, Neurexin 1-beta, TSLC1, Frizzled, Protocadherin 18, Thrombospondin 2                                                                                                    | 17 |
| Cartilage development                       | 9.55E-03 | COL1A1, Fibrillin 1, MMP-13, COL1A2, Aggrecanase-1, Chondroadherin, BMPR1B, Collagen III                                                                                                                                                                                                              | 8  |
| <b><u>Cell adhesion</u></b>                 |          |                                                                                                                                                                                                                                                                                                       |    |
| Platelet-endothelium-leucocyte interactions | 6.37E-07 | ITGAX, IL-1 beta, Endoglin, EGF, G-CSF receptor, VCAM1, MMP-13, PDGF-B, Collagen IV, LEKTI, PDGF receptor, IL-18, TFPI-2, ESAM, 08p22/MSR1(CD204), Protein C, LDLR, P-selectin, PDGF-D, PDGF-R-beta, Collagen III, Thrombospondin 2, KNG, Collagen I, CD40(TNFRSF5), Tetraspanin-2, COL5A2, PZP, OLR1 | 29 |
| Cell-matrix interactions                    | 1.33E-05 | COL1A1, 90K, MMP-12, Trypsin, Fibrillin 1, COL4A2, ADAM23, Collagen X, COL4A1, MMP-13, ADAM-TS9, , COL5A2, Fibulin-3, Chondroadherin, Fibulin-5, Tenascin-C, LAMB1, Integrin, SP-D, Fibrillin 2, Collagen I, TIMP1, Connexin 43, Collagen III, Tenascin-X, MMP-8, COL1A2, Aggrecanase-1               | 28 |
| Synaptic contact                            | 4.94E-05 | Neurologin 1, Homer, N-cadherin, CNTN1 (F3), Caspr2, Neurexin 1-alpha, Rab-27A, Delta-catenin, Synaptotagmin VIII, GABA-A receptor, Ephrin-A, K(+) channel, subfamily J, CaMK II beta, Ephrin-B2, GABA-A receptor epsilon subunit, Syndecan-2, L1CAM, IP3 receptor, Alpha-catenin Synaptotagmin-IX,   | 21 |

**Proteolysis**

ECM remodeling 2.50E-05 MMP-12, Osteopontin, Collagen X, MMP-8, MMP-13, Trypsin II, Aggrecanase-1, Collagen IV, Alpha 1-antitrypsin, TFPI-2, PACE4, Tenascin-C, SERPINA3 (ACT), Collagen I, TIMP1, ADAM28, Collagen III 17

Connective tissue degradation 7.01E-05 MMP-12, ADAM23, MMP-8, MMP-13, ADAM-TS9, Trypsin II, Aggrecanase-1, Collagen IV, CD23, Alpha 1-antitrypsin, TFPI-2, PACE4, Tenascin-C, SERPINA3 (ACT), Tissue kallikreins, Collagen I, ADAM28, Collagen III 18

**Chemotaxis**

Chemotaxis 4.97E-04 CCL28, CCL3L1, GRO-2, IL-1 beta, SP-D, C5a Galpha(i)-specific peptide GPCRs, Osteopontin, CCL20, IL-1 alpha, Galpha(q)-specific peptide GPCRs, CCL13, PPBP, Integrin, G-protein alpha-i family, Lymphotactin, IL8RB, CCL25, GRO-3, 19

**Inflammation**

Innate inflammatory response 6.60E-03 PKC-zeta, IL-1 beta, IL-1F9, CCL20, IL-1 alpha, PGES, PGRP-S, CD14, IL-18, Tissue factor, PLA2, IP3R2, Factor I, G-protein alpha-i family, SP-D, RIPK3, C5a, sCD14, IP3 receptor 19

---
