# Supplementary material for: Klf5 Deletion Promotes Pten Deletion–Initiated Luminal-Type Mouse Prostate Tumors through Multiple Oncogenic Signaling Pathways
Source: PubMed Central journal article supplement — Neoplasia. 2014 Nov 20;16(11):883–99. doi: 10.1016/j.neo.2014.09.006 (PMC4240924; doi:10.1016/j.neo.2014.09.006), 2014-11-20
Supplement: mmc12.pdf [file mmc12.pdf]

**Table S7.** Significant pathways identified by the MetaCore analysis based on the differentially expressed genes between *Klf5*-wildtype and *Klf5*-null mouse dorsal prostates. All pathways are ranked based on their *p*-values (from low to high, *p*-value<0.01).

| <b>Pathways</b>                                                                 | <b><i>p</i>-Value</b> | <b>Genes</b>                                                                                     | <b>Number</b> |
|---------------------------------------------------------------------------------|-----------------------|--------------------------------------------------------------------------------------------------|---------------|
| Protein folding and maturation_Bradykinin / Kallidin maturation                 | 3.55E-07              | MMP-8, Carboxypeptidase N (cat), Neprilysin, Tissue kallikreins, KNG, Carboxypeptidase M         | 6             |
| Protein folding and maturation_Angiotensin system maturation/Rodent version     | 2.84E-06              | AGTR1, Angiotensin MMP-8, Neprilysin,                                                            | 4             |
| Development_Regulation of epithelial-to-mesenchymal transition (EMT)            | 5.17E-05              | IL-1 beta, HEY1, VE-cadherin, N-cadherin, EGF, PDGF-B, WNT, PDGF-D, Frizzled, Bcl-2, PDGF-R-beta | 11            |
| Colorectal cancer (general schema)                                              | 1.70E-04              | EGF, WNT5A, Leptin receptor, Ephrin-B, WNT, Frizzled, IL8RB                                      | 7             |
| Neurophysiological process_Dopamine D2 receptor transactivation of PDGFR in CNS | 5.34E-04              | PP2A regulatory, PKC, PDGF receptor, G-protein alpha-i family, IP3 receptor, PDGF-R-beta         | 6             |
| Development_Oligodendrocyte differentiation from adult stem cells               | 1.03E-03              | PLP1, CNTN1 (F3), Myelin basic protein, FGFR3, EDNRB, PDGF-B, TAT1, BMPR1B                       | 8             |
| Glutathione metabolism                                                          | 1.14E-03              | GSTM2, GPX3, GSTM5, GPX2, MGST, GSTT1, GSTA3, GGT1, GSTO1                                        | 9             |
| Cell adhesion_ECM                                                               | 1.18E-03              | MMP-12, ErbB4, MMP-13,                                                                           | 8             |

|                                                                               |          |                                                                                                                                      |   |
|-------------------------------------------------------------------------------|----------|--------------------------------------------------------------------------------------------------------------------------------------|---|
| remodeling                                                                    |          | Collagen IV, Syndecan-2,<br>Collagen I, TIMP1, Collagen<br>III                                                                       |   |
| Development_Transcription<br>factors in segregation of<br>hepatocytic lineage | 1.20E-03 | Keratin 7, OC-2, Albumin,<br>Alpha 1-antitrypsin, A2M,<br>HHEX (PRH)                                                                 | 6 |
| Role of platelets in allograft<br>rejection                                   | 1.69E-03 | IL-1 beta, CD40(TNFRSF5),<br>Tissue factor, P-selectin,<br>Collagen I, SLC21A2,<br>Collagen III                                      | 7 |
| Muscle<br>contraction_Regulation of<br>eNOS activity in<br>cardiomyocytes     | 1.92E-03 | Phospholamban, PDE2A,<br>Adenylate cyclase type V,<br>PDE3A, Troponin T, cardiac,<br>ACM2, G-protein alpha-i<br>family, IP3 receptor | 8 |
| Cell adhesion_Endothelial cell<br>contacts by non-junctional<br>mechanisms    | 2.56E-03 | N-cadherin, Collagen IV,<br>ESAM, Alpha-catenin,<br>Collagen I                                                                       | 5 |
| Cytoskeleton<br>remodeling_Role of PDGFs in<br>cell migration                 | 2.56E-03 | PDGF-B, PDGF receptor,<br>PDGF-D, VAV-2,<br>PDGF-R-beta                                                                              | 5 |
| Transport_Alpha-2 adrenergic<br>receptor regulation of ion<br>channels        | 2.87E-03 | PKC-zeta, Adenylate cyclase<br>type V, Alpha-2A adrenergic<br>receptor, G-protein alpha-i<br>family, IP3 receptor                    | 5 |
| Development_Lipoxin<br>inhibitory action on PDGF,<br>EGF and LTD4 signaling   | 3.19E-03 | EGF, SOCS2, PDGF-B,<br>G-protein alpha-i family,<br>Adenylate cyclase,<br>PDGF-R-beta                                                | 6 |
| Development_Thromboxane<br>A2 pathway signaling                               | 3.65E-03 | EGF, MSK1/2 (RPS6KA5/4),<br>PKC, Tcf(Lef), G-protein<br>alpha-i family, Adenylate<br>cyclase, IP3 receptor                           | 7 |

|                                                                                                        |          |                                                                                               |   |
|--------------------------------------------------------------------------------------------------------|----------|-----------------------------------------------------------------------------------------------|---|
| G-protein signaling_H-RAS regulation pathway                                                           | 3.68E-03 | TIE2, RASGRF1, PDGF-B, CalDAG-GEFIII, RET, PDGF-R-beta                                        | 6 |
| Development_Retinoic acid and retinoic acid receptors in regulation of oligodendrocyte differentiation | 3.68E-03 | PLP1, UGT8, Myelin basic protein, DHA2, PGAR, Transthyretin                                   | 6 |
| Development_Neural stem cell lineage commitment (schema)                                               | 4.22E-03 | PLP1, CNTN1 (F3), Myelin basic protein, MCT1 (SLC16A1), NeuN, MAP2                            | 6 |
| Signal transduction_cAMP signaling                                                                     | 4.22E-03 | KDELRL, PKC-zeta, Phospholamban, Adenylate cyclase type V, PKC, G-protein alpha-i family      | 6 |
| Signal transduction_PKA signaling                                                                      | 4.59E-03 | KDELRL, PP2A regulatory, DARPP-32, AKAP12, PDE3A, G-protein alpha-i family, Adenylate cyclase | 7 |
| Some pathways of EMT in cancer cells                                                                   | 4.59E-03 | 4E-BP1, EGF, PDGF-B, PDGF receptor, PDGF-D, Bcl-2, PDGF-R-beta                                | 7 |
| Development_BMP7 in brown adipocyte differentiation                                                    | 4.82E-03 | PERC, Angiotensinogen, BMP7, PPAR-gamma, SERPINA3 (ACT), Necdin                               | 6 |
| Blood coagulation_Blood coagulation                                                                    | 4.82E-03 | Tissue factor, Alpha 1-antitrypsin, A2M, Protein C, Bradykinin, KNG                           | 6 |
| CFTR-dependent regulation of ion channels in CF                                                        | 6.20E-03 | KCNQ1, beta-ENaC, SK4/IK1, alpha-ENaC, IP3 receptor, CLCA2                                    | 6 |
| Breast cancer (general                                                                                 | 6.20E-03 | EGF, ErbB4, Jagged2, Leptin                                                                   | 6 |

|                                                                   |          |                                                                                                                            |   |
|-------------------------------------------------------------------|----------|----------------------------------------------------------------------------------------------------------------------------|---|
| schema)                                                           |          | receptor, GHR, Prolactin receptor                                                                                          |   |
| Muscle contraction_GPCRs in the regulation of smooth muscle tone  | 6.88E-03 | AGTR1, Adenosine A2b receptor, Angiotensin II, MyHC, ACM2, G-protein alpha-i family, Adenylate cyclase, IP3 receptor, ACM3 | 9 |
| Airway smooth muscle contraction in asthma                        | 7.72E-03 | Phospholamban, MyHC, G-protein alpha-i family, Adenylate cyclase, Bradykinin, IP3 receptor, ACM3                           | 7 |
| Impaired Lipoxin A4 signaling in CF                               | 8.78E-03 | EGF, SOCS2, PDGF-B, G-protein alpha-i family, Adenylate cyclase, PDGF-R-beta                                               | 6 |
| Development_Role of G-CSF in hematopoietic stem cell mobilization | 9.70E-03 | G-CSF receptor, C5a, Cathepsin K, Carboxypeptidase M                                                                       | 4 |
| Multiple sclerosis (general schema)                               | 9.70E-03 | WNT5A, VCAM1, Apo-2L(TNFSF10), Transthyretin                                                                               | 4 |
| G-protein signaling_Regulation of cAMP levels by ACM              | 9.79E-03 | Adenylate cyclase type V, ACM2, G-protein alpha-i family, IP3 receptor, ACM3                                               | 5 |

---
