# Supplementary material for: Klf5 Deletion Promotes Pten Deletion–Initiated Luminal-Type Mouse Prostate Tumors through Multiple Oncogenic Signaling Pathways
Source: PubMed Central journal article supplement — Neoplasia. 2014 Nov 20;16(11):883–99. doi: 10.1016/j.neo.2014.09.006 (PMC4240924; doi:10.1016/j.neo.2014.09.006), 2014-11-20
Supplement: mmc13.pdf [file mmc13.pdf]

**Table S8.** Key transcription factors significantly associated with differentially expressed genes between *Klf5*-wildtype and *Klf5*-null mouse dorsal prostates, as defined by MetaCore's interactome analysis for transcription factors. Related biological processes are also shown. The ranking is based on *p*-Values. Total nodes refer to all nodes in a transcription factor network, while seed nodes refer to the genes differentially expressed between the experimental groups.

| # | Network           | GO processes                                                                                                                                                                                                                                                     | Total nodes | Seed nodes | Pathways | <i>p</i> -Value | zScore | gScore |
|---|-------------------|------------------------------------------------------------------------------------------------------------------------------------------------------------------------------------------------------------------------------------------------------------------|-------------|------------|----------|-----------------|--------|--------|
| 1 | CREB1             | developmental process (55.5%; 3.015e-17), system development (47.6%; 4.248e-17), anatomical structure development (50.8%; 3.889e-16), multicellular organismal development (51.2%; 4.525e-16), single-multicellular organism process (63.4%; 5.535e-16)          | 276         | 275        | 0        | 0.00E+00        | 132.95 | 132.95 |
| 2 | SP1               | response to organic substance (51.5%; 1.965e-29), response to oxygen-containing compound (39.8%; 1.028e-28), response to endogenous stimulus (38.8%; 6.018e-27), response to chemical (59.7%; 1.498e-24), response to organic cyclic compound (30.6%; 1.905e-24) | 202         | 201        | 0        | 0.00E+00        | 113.52 | 113.52 |
| 3 | ESR1 (nuclear)    | response to endogenous stimulus (40.6%; 2.493e-21), response to oxygen-containing compound (39.9%; 1.125e-20), response to organic substance (50.7%; 2.572e-20), response to hormone (32.6%; 1.386e-19), response to organic cyclic compound (31.2%; 3.213e-18)  | 144         | 143        | 0        | 3.28E-262       | 95.62  | 95.62  |
| 4 | c-Myc             | system development (61.8%; 2.323e-21), multicellular organismal development (66.2%; 3.031e-21), single-organism developmental process (61.0%; 6.762e-21), developmental process (69.1%; 7.525e-21), response to organic substance (51.5%; 8.814e-21)             | 142         | 141        | 0        | 1.81E-258       | 94.94  | 94.94  |
| 5 | Androgen receptor | response to hormone (28.0%; 1.308e-12), response to endogenous stimulus (33.9%; 1.341e-12), response to organic substance (44.1%; 2.319e-12), developmental process (61.0%; 3.805e-12), response to steroid hormone (20.3%; 5.312e-12)                           | 123         | 122        | 0        | 5.09E-223       | 88.25  | 88.25  |

|    |                          |                                                                                                                                                                                                                                                                  |     |     |   |           |       |       |
|----|--------------------------|------------------------------------------------------------------------------------------------------------------------------------------------------------------------------------------------------------------------------------------------------------------|-----|-----|---|-----------|-------|-------|
| 6  | GCR-alpha                | response to organic cyclic compound (32.8%; 4.400e-17), response to hormone (31.0%; 3.520e-15), response to organic substance (47.4%; 1.212e-14), response to lipid (29.3%; 1.908e-14), response to oxygen-containing compound (36.2%; 2.171e-14)                | 120 | 119 | 0 | 1.94E-217 | 87.15 | 87.15 |
| 7  | RelA (p65 NF-kB subunit) | response to wounding (48.2%; 7.088e-33), response to oxygen-containing compound (54.4%; 1.423e-32), response to organic substance (63.2%; 8.483e-29), response to endogenous stimulus (49.1%; 2.075e-26), response to organic cyclic compound (39.5%; 8.249e-24) | 119 | 118 | 0 | 1.41E-215 | 86.78 | 86.78 |
| 8  | Oct-3/4                  | response to organic substance (47.2%; 2.474e-13), anatomical structure development (60.4%; 4.601e-13), developmental process (64.2%; 4.951e-13), system development (55.7%; 1.253e-12), single-organism developmental process (54.7%; 3.473e-12)                 | 117 | 116 | 0 | 7.34E-212 | 86.03 | 86.03 |
| 9  | c-Jun                    | response to organic cyclic compound (41.7%; 5.487e-25), response to lipid (40.7%; 7.520e-25), response to oxygen-containing compound (48.1%; 3.072e-24), response to organic substance (59.3%; 1.535e-23), response to wounding (39.8%; 7.253e-22)               | 115 | 114 | 0 | 3.82E-208 | 85.28 | 85.28 |
| 10 | HIF1A                    | response to hypoxia (20.4%; 6.416e-16), response to decreased oxygen levels (20.4%; 8.605e-16), response to oxygen levels (20.4%; 2.918e-14), response to oxygen-containing compound (37.0%; 3.747e-14), response to organic cyclic compound (30.6%; 4.952e-14)  | 115 | 114 | 0 | 3.82E-208 | 85.28 | 85.28 |
| 11 | C/EBPbeta                | response to lipid (38.3%; 4.889e-22), response to oxygen-containing compound (45.8%; 1.025e-21), response to organic cyclic compound (38.3%; 3.095e-21), response to organic substance (56.1%; 1.821e-20), response to stimulus (86.0%; 1.198e-17)               | 113 | 112 | 0 | 1.98E-204 | 84.52 | 84.52 |
| 12 | p53                      | regulation of cell proliferation (38.2%; 1.017e-15), system development (60.8%; 1.165e-15), positive regulation of cellular process (57.8%; 4.410e-15), response to endogenous stimulus (39.2%; 4.934e-15), anatomical structure development (63.7%; 7.385e-15)  | 108 | 107 | 0 | 3.74E-195 | 82.59 | 82.59 |

|    |            |                                                                                                                                                                                                                                                                                                                  |     |     |   |           |       |       |
|----|------------|------------------------------------------------------------------------------------------------------------------------------------------------------------------------------------------------------------------------------------------------------------------------------------------------------------------|-----|-----|---|-----------|-------|-------|
| 13 | LHX2       | developmental process (68.5%; 9.158e-14), anatomical structure development (64.0%; 2.432e-13), system development (57.3%; 9.390e-12), multicellular organismal development (60.7%; 4.165e-11), single-multicellular organism process (71.9%; 1.455e-10)                                                          | 101 | 100 | 0 | 3.48E-182 | 79.81 | 79.81 |
| 14 | STAT3      | positive regulation of biological process (69.2%; 4.788e-19), positive regulation of cellular process (64.8%; 2.008e-18), response to organic substance (56.0%; 1.355e-17), multicellular organismal development (70.3%; 1.451e-17), developmental process (73.6%; 1.483e-17)                                    | 96  | 95  | 0 | 6.18E-173 | 77.77 | 77.77 |
| 15 | HNF4-alpha | developmental process (69.0%; 2.252e-13), response to endogenous stimulus (38.1%; 6.573e-12), response to organic substance (48.8%; 8.620e-12), response to organic cyclic compound (31.0%; 1.705e-11), anatomical structure development (61.9%; 1.827e-11)                                                      | 91  | 90  | 0 | 1.07E-163 | 75.67 | 75.67 |
| 16 | C/EBPalpha | organ development (61.5%; 2.722e-18), response to organic substance (59.0%; 3.377e-17), response to stimulus (89.7%; 6.611e-16), system development (66.7%; 8.570e-16), developmental process (74.4%; 1.032e-15)                                                                                                 | 85  | 84  | 0 | 1.25E-152 | 73.07 | 73.07 |
| 17 | GATA-3     | regulation of multicellular organismal process (49.3%; 4.817e-13), epithelium development (32.0%; 1.089e-12), positive regulation of cellular process (60.0%; 1.283e-12), positive regulation of macromolecule metabolic process (46.7%; 1.680e-12), positive regulation of metabolic process (48.0%; 2.844e-12) | 84  | 83  | 0 | 8.71E-151 | 72.63 | 72.63 |
| 18 | PU.1       | response to wounding (38.2%; 1.277e-14), response to organic substance (55.3%; 1.894e-14), positive regulation of biological process (65.8%; 4.938e-14), defense response (40.8%; 6.809e-14), regulation of multicellular organismal process (50.0%; 1.351e-13)                                                  | 84  | 83  | 0 | 8.71E-151 | 72.63 | 72.63 |
| 19 | PPAR-gamma | response to oxygen-containing compound (47.3%; 1.847e-16), anatomical structure development (73.0%; 1.868e-16), developmental process (75.7%; 8.479e-16), response to lipid (37.8%; 2.556e-15), response to organic substance (56.8%; 5.292e-15)                                                                 | 81  | 81  | 0 | 5.22E-149 | 72.19 | 72.19 |

|    |       |                                                                                                                                                                                                                                                                                                             |    |    |   |           |       |       |
|----|-------|-------------------------------------------------------------------------------------------------------------------------------------------------------------------------------------------------------------------------------------------------------------------------------------------------------------|----|----|---|-----------|-------|-------|
| 20 | NANOG | negative regulation of macromolecule metabolic process (42.1%; 1.838e-13), positive regulation of cellular process (60.5%; 4.612e-13), response to organic substance (52.6%; 6.755e-13), response to stimulus (85.5%; 1.261e-12), negative regulation of metabolic process (42.1%; 1.459e-12)               | 83 | 82 | 0 | 6.06E-149 | 72.18 | 72.18 |
| 21 | E2F1  | negative regulation of cellular process (63.5%; 6.179e-16), positive regulation of developmental process (35.1%; 9.350e-15), regulation of signal transduction (51.4%; 1.713e-14), positive regulation of cellular process (63.5%; 1.874e-14), negative regulation of biological process (63.5%; 2.496e-14) | 82 | 81 | 0 | 4.22E-147 | 71.73 | 71.73 |

---
